# Supplementary material for: Towards more effective beryllium chelation: an investigation of second-sphere hydrogen bonding
Source: Royal Society of Chemistry journal article supplement (doi:10.1039/d0ra08706h), 2020-01-01
Supplement: d0ra08706h1.pdf [file d0ra08706h1.pdf]

## Towards more effective beryllium chelation: An investigation of second-sphere hydrogen bonding

Tyson N. Dais, David J. Nixon, Penelope J. Brothers, William Henderson, and Paul G. Plieger\*

Supporting Information:

Gibbs free energy ( $\Delta G \approx \varepsilon_0 + G_{\text{correction}}$ ) kJ/mol  
xyz cartesian coordinates

|              |              |          |          |    |          |          |          |
|--------------|--------------|----------|----------|----|----------|----------|----------|
| HL           |              |          |          | C  | 1.78992  | -0.05975 | 1.28709  |
| $\Delta G =$ | -1087.602947 |          |          | C  | 0.96116  | -0.15389 | 3.56221  |
| C            | -0.67758     | 2.14381  | 1.77255  | C  | -0.36165 | -0.11628 | 3.10568  |
| C            | 0.46667      | 1.60046  | 1.18965  | H  | 1.16036  | -0.20489 | 4.62547  |
| H            | -0.58633     | 2.88808  | 2.55707  | C  | -0.55926 | -0.05735 | 1.74607  |
| C            | 0.29262      | 0.65084  | 0.18177  | H  | -1.19734 | -0.13515 | 3.79114  |
| H            | 1.45565      | 1.89843  | 1.51066  | C  | -1.94600 | -0.02032 | 1.08831  |
| C            | 1.46317      | -0.04131 | -0.52395 | H  | -2.69303 | -0.03705 | 1.87666  |
| H            | 1.14444      | -0.17333 | -1.55970 | C  | -3.12588 | 2.19436  | 0.58407  |
| C            | 3.00516      | 1.61321  | -1.66121 | C  | -3.24695 | 3.33344  | -0.21142 |
| C            | 4.16328      | 2.38300  | -1.67317 | H  | -3.78222 | 2.03044  | 1.42798  |
| H            | 2.31342      | 1.64117  | -2.49496 | C  | -1.42491 | 2.55901  | -1.54864 |
| C            | 4.68428      | 1.46998  | 0.47066  | C  | -2.38729 | 3.51825  | -1.29001 |
| C            | 5.02676      | 2.31297  | -0.58245 | H  | -4.00858 | 4.06969  | 0.01280  |
| H            | 4.38945      | 3.02188  | -2.51924 | H  | -0.72891 | 2.65328  | -2.37140 |
| H            | 5.33248      | 1.38517  | 1.33827  | H  | -2.45454 | 4.39051  | -1.92511 |
| H            | 5.94239      | 2.89039  | -0.54692 | C  | -2.17174 | -1.24988 | 0.20243  |
| C            | 1.72866      | -1.45148 | -0.00023 | C  | -3.30188 | -3.26871 | -0.40947 |
| C            | 1.76708      | -3.12994 | 1.72134  | C  | -1.46121 | -2.44901 | -1.69312 |
| C            | 2.50854      | -3.55928 | -0.50591 | C  | -2.43956 | -3.40605 | -1.49289 |
| C            | 2.29442      | -4.02041 | 0.78980  | H  | -4.07582 | -4.00450 | -0.23047 |
| H            | 1.58179      | -3.44284 | 2.74271  | H  | -0.76235 | -2.50869 | -2.51654 |
| H            | 2.91445      | -4.22240 | -1.26466 | H  | -2.51689 | -4.24041 | -2.17598 |
| H            | 2.53091      | -5.04384 | 1.05405  | C  | -2.14755 | 1.26463  | 0.27915  |
| C            | 2.73920      | 0.79483  | -0.55750 | C  | -3.16644 | -2.17923 | 0.45047  |
| C            | 1.47927      | -1.82878 | 1.32184  | H  | -3.82326 | -2.05440 | 1.30066  |
| H            | 1.06678      | -1.11527 | 2.02342  | N  | 0.48904  | -0.03153 | 0.88300  |
| N            | -0.91459     | 0.25546  | -0.23463 | N  | -1.31313 | 1.45497  | -0.77908 |
| N            | 3.57122      | 0.72544  | 0.49144  | N  | -1.33612 | -1.39208 | -0.86196 |
| N            | 2.23444      | -2.30945 | -0.90021 | C  | 2.01997  | -0.12789 | 2.67312  |
| C            | -1.93321     | 1.73363  | 1.34999  | H  | 3.02451  | -0.16292 | 3.06196  |
| H            | -2.84017     | 2.12165  | 1.78728  | C  | 2.87603  | -0.01770 | 0.28184  |
| C            | -3.33425     | 0.29479  | -0.20885 | C  | 4.21584  | -0.00656 | 0.73456  |
| C            | -3.33696     | -0.40613 | -1.43206 | C  | 2.67766  | 0.01489  | -1.13056 |
| C            | -4.59659     | 0.51740  | 0.48235  | C  | 5.29508  | 0.02636  | -0.12944 |
| C            | -4.49046     | -0.90253 | -2.02244 | H  | 4.42309  | -0.01975 | 1.79436  |
| H            | -2.38211     | -0.55231 | -1.92309 | C  | 3.77646  | 0.04523  | -1.99519 |
| C            | -5.76356     | -0.02601 | -0.16397 | C  | 5.07299  | 0.05012  | -1.50857 |
| C            | -5.71767     | -0.70506 | -1.36543 | H  | 6.30213  | 0.03437  | 0.26797  |
| H            | -4.44397     | -1.42697 | -2.97035 | H  | 3.57494  | 0.06615  | -3.05903 |
| H            | -6.71153     | 0.12588  | 0.34458  | H  | 5.90741  | 0.07465  | -2.19954 |
| H            | -6.63663     | -1.08525 | -1.80402 | O  | 1.45820  | 0.01836  | -1.73643 |
| O            | -4.71245     | 1.13829  | 1.59961  | Al | -0.04325 | 0.02463  | -0.92287 |
| C            | -2.03699     | 0.76985  | 0.32252  |    |          |          |          |

HL Be (II)

$\Delta G = -1102.257071$

|   |          |          |          |
|---|----------|----------|----------|
| C | -1.69975 | -0.00109 | -1.30112 |
|---|----------|----------|----------|

HL Al (III)

$\Delta G = -1329.760349$

|    |          |          |          |   |          |          |          |
|----|----------|----------|----------|---|----------|----------|----------|
| C  | -0.89206 | -0.00257 | -3.58252 | C | 0.53834  | -0.00010 | -3.18065 |
| C  | 0.43005  | -0.00194 | -3.12342 | H | -0.98497 | -0.00017 | -4.70336 |
| H  | -1.09274 | -0.00338 | -4.64725 | C | 0.73975  | -0.00006 | -1.82285 |
| C  | 0.62366  | -0.00100 | -1.75672 | H | 1.37678  | -0.00012 | -3.86280 |
| H  | 1.26869  | -0.00222 | -3.80640 | C | 2.08153  | -0.00002 | -1.09883 |
| C  | 1.99153  | -0.00026 | -1.07470 | H | 2.90932  | -0.00003 | -1.80068 |
| H  | 2.77794  | -0.00046 | -1.82496 | C | 3.04125  | 2.24303  | -0.20611 |
| C  | 3.10217  | 2.20432  | -0.35380 | C | 2.89695  | 3.28404  | 0.71363  |
| C  | 3.11957  | 3.29075  | 0.51921  | H | 3.85907  | 2.22354  | -0.91322 |
| H  | 3.83759  | 2.10713  | -1.14159 | C | 0.92592  | 2.23485  | 1.57809  |
| C  | 1.20026  | 2.38197  | 1.61939  | C | 1.83328  | 3.28006  | 1.61233  |
| C  | 2.15651  | 3.38320  | 1.52026  | H | 3.61514  | 4.09429  | 0.72502  |
| H  | 3.87858  | 4.05670  | 0.41620  | H | 0.07363  | 2.16182  | 2.23906  |
| H  | 0.42446  | 2.40007  | 2.37462  | H | 1.70163  | 4.07475  | 2.33321  |
| H  | 2.14152  | 4.21353  | 2.21344  | C | 2.10934  | -1.22543 | -0.19326 |
| C  | 2.11754  | -1.24016 | -0.19212 | C | 2.89702  | -3.28396 | 0.71382  |
| C  | 3.12121  | -3.28905 | 0.52260  | C | 0.92596  | -2.23476 | 1.57822  |
| C  | 1.20141  | -2.38010 | 1.62183  | C | 1.83334  | -3.27995 | 1.61252  |
| C  | 2.15816  | -3.38097 | 1.52372  | H | 3.61522  | -4.09419 | 0.72526  |
| H  | 3.88058  | -4.05473 | 0.42038  | H | 0.07367  | -2.16171 | 2.23918  |
| H  | 0.42560  | -2.39783 | 2.37704  | H | 1.70171  | -4.07460 | 2.33344  |
| H  | 2.14355  | -4.21061 | 2.21772  | C | 2.10931  | 1.22545  | -0.19333 |
| C  | 2.11690  | 1.24064  | -0.19343 | C | 3.04129  | -2.24300 | -0.20597 |
| C  | 3.10330  | -2.20351 | -0.35149 | H | 3.85912  | -2.22352 | -0.91309 |
| H  | 3.83868  | -2.10675 | -1.13938 | N | -0.31011 | -0.00003 | -0.96014 |
| N  | -0.41013 | -0.00065 | -0.89389 | N | 1.07901  | 1.23945  | 0.68681  |
| N  | 1.18766  | 1.33610  | 0.77961  | N | 1.07904  | -1.23941 | 0.68688  |
| N  | 1.18832  | -1.33508 | 0.78099  | C | -1.84500 | -0.00011 | -2.74803 |
| C  | -1.94814 | -0.00216 | -2.68794 | H | -2.85781 | -0.00013 | -3.12008 |
| H  | -2.95877 | -0.00271 | -3.06636 | C | -2.63759 | -0.00002 | -0.32970 |
| C  | -2.75235 | -0.00042 | -0.26994 | C | -4.01030 | -0.00002 | -0.64743 |
| C  | -4.11138 | -0.00028 | -0.65212 | C | -2.27566 | 0.00001  | 1.03348  |
| C  | -2.44617 | 0.00014  | 1.12863  | C | -4.97511 | 0.00001  | 0.34537  |
| C  | -5.14151 | 0.00026  | 0.27184  | H | -4.32620 | -0.00003 | -1.68188 |
| H  | -4.37111 | -0.00052 | -1.70248 | C | -3.24423 | 0.00004  | 2.03371  |
| C  | -3.51303 | 0.00060  | 2.05181  | C | -4.58911 | 0.00004  | 1.68991  |
| C  | -4.83302 | 0.00065  | 1.63834  | H | -6.02403 | 0.00001  | 0.07770  |
| H  | -6.17160 | 0.00037  | -0.06282 | H | -2.92373 | 0.00006  | 3.06793  |
| H  | -3.25796 | 0.00095  | 3.10537  | H | -5.33964 | 0.00006  | 2.47131  |
| H  | -5.62743 | 0.00104  | 2.37670  | O | -0.97005 | 0.00002  | 1.43826  |
| O  | -1.21199 | 0.00021  | 1.62137  | B | 0.09591  | 0.00001  | 0.54027  |
| Be | 0.04205  | 0.00021  | 0.74551  |   |          |          |          |

HL Ca (II)

$\Delta G = -1765.133379$

|                           |          |          |          |   |          |          |         |
|---------------------------|----------|----------|----------|---|----------|----------|---------|
| HL B(III)                 |          |          |          | C | -1.85751 | -0.20375 | 1.23694 |
| $\Delta G = -1112.127021$ |          |          |          | C | -0.95836 | -0.51822 | 3.45991 |
| C                         | -1.60695 | -0.00005 | -1.36588 | C | 0.31193  | -0.29057 | 2.94263 |
| C                         | -0.78660 | -0.00013 | -3.63892 |   |          |          |         |

|    |          |          |          |    |          |          |          |
|----|----------|----------|----------|----|----------|----------|----------|
| H  | -1.09482 | -0.72798 | 4.51449  | C  | 0.53052  | -0.35108 | -1.71759 |
| C  | 0.44590  | -0.05987 | 1.57499  | H  | 1.17832  | -0.52362 | -3.75544 |
| H  | 1.18425  | -0.30091 | 3.58319  | C  | 1.93319  | -0.17050 | -1.14126 |
| C  | 1.86409  | 0.17022  | 1.03736  | H  | 2.64210  | -0.25523 | -1.96204 |
| H  | 2.48803  | 0.27415  | 1.92309  | C  | 2.99588  | 2.14654  | -1.02866 |
| C  | 3.54890  | -1.69820 | 0.79082  | C  | 3.09245  | 3.39569  | -0.42132 |
| C  | 4.04272  | -2.81127 | 0.11885  | H  | 3.61159  | 1.89329  | -1.88226 |
| H  | 4.03225  | -1.33813 | 1.69021  | C  | 1.39524  | 2.70969  | 1.11674  |
| C  | 2.27509  | -2.54120 | -1.46003 | C  | 2.27881  | 3.68409  | 0.67027  |
| C  | 3.39240  | -3.24584 | -1.03204 | H  | 3.79263  | 4.13177  | -0.79750 |
| H  | 4.91905  | -3.32958 | 0.48959  | H  | 0.73599  | 2.88606  | 1.95792  |
| H  | 1.74087  | -2.84829 | -2.35284 | H  | 2.32253  | 4.64274  | 1.17035  |
| H  | 3.73694  | -4.10776 | -1.58850 | C  | 2.25675  | -1.24260 | -0.11811 |
| C  | 2.03734  | 1.47738  | 0.26849  | C  | 3.54714  | -3.07304 | 0.73647  |
| C  | 3.01540  | 3.66998  | 0.10002  | C  | 1.67036  | -2.18963 | 1.92523  |
| C  | 1.57183  | 2.78474  | -1.57986 | C  | 2.71042  | -3.10341 | 1.84939  |
| C  | 2.36299  | 3.82891  | -1.11866 | H  | 4.36776  | -3.77420 | 0.64617  |
| H  | 3.64323  | 4.45757  | 0.49959  | H  | 0.98833  | -2.17038 | 2.76719  |
| H  | 1.04405  | 2.86821  | -2.52399 | H  | 2.85462  | -3.82021 | 2.64671  |
| H  | 2.46059  | 4.73587  | -1.70112 | C  | 2.08983  | 1.21998  | -0.52139 |
| C  | 2.41827  | -1.04482 | 0.29557  | C  | 3.31866  | -2.12980 | -0.26087 |
| C  | 2.85064  | 2.48026  | 0.80117  | H  | 3.95174  | -2.07862 | -1.13711 |
| H  | 3.34737  | 2.32761  | 1.75099  | N  | -0.50188 | -0.31968 | -0.84830 |
| N  | -0.60596 | -0.03229 | 0.73539  | N  | 1.30730  | 1.50384  | 0.53580  |
| N  | 1.79399  | -1.46387 | -0.81662 | N  | 1.45126  | -1.28041 | 0.95824  |
| N  | 1.40871  | 1.63349  | -0.90769 | C  | -2.03084 | -0.48534 | -2.66261 |
| C  | -2.04483 | -0.47623 | 2.60442  | H  | -3.04687 | -0.48331 | -3.02915 |
| H  | -3.04097 | -0.66702 | 2.97870  | C  | -2.89180 | -0.21349 | -0.31889 |
| C  | -3.05622 | -0.08370 | 0.37104  | C  | -4.16954 | -0.71114 | -0.64836 |
| C  | -4.20062 | 0.53616  | 0.90959  | C  | -2.73237 | 0.49018  | 0.91552  |
| C  | -3.11636 | -0.62109 | -0.95664 | C  | -5.27437 | -0.50614 | 0.16126  |
| C  | -5.39456 | 0.63473  | 0.20779  | H  | -4.29211 | -1.28775 | -1.55717 |
| H  | -4.14031 | 0.97242  | 1.90085  | C  | -3.88025 | 0.71529  | 1.71004  |
| C  | -4.36125 | -0.53358 | -1.63775 | C  | -5.12350 | 0.23075  | 1.34338  |
| C  | -5.46873 | 0.08017  | -1.07644 | H  | -6.23845 | -0.91313 | -0.11812 |
| H  | -6.24885 | 1.13546  | 0.64772  | H  | -3.74831 | 1.27278  | 2.63037  |
| H  | -4.41153 | -0.96130 | -2.63377 | H  | -5.97924 | 0.41207  | 1.98490  |
| H  | -6.39492 | 0.13593  | -1.63997 | O  | -1.57430 | 0.96570  | 1.34927  |
| O  | -2.08865 | -1.18489 | -1.53628 | Co | -0.03295 | -0.00889 | 1.02632  |
| Ca | -0.14038 | -0.16569 | -1.77373 |    |          |          |          |

HL Co (III)

$\Delta G = -2469.956572$

HL Co (II)

$\Delta G = -2470.174092$

|   |          |          |          |   |          |         |          |
|---|----------|----------|----------|---|----------|---------|----------|
| C | -1.78640 | -0.35727 | -1.28319 | C | -1.72793 | 1.08831 | -0.82966 |
| C | -0.97690 | -0.57497 | -3.55388 | C | -0.88611 | 2.39378 | -2.70139 |
| C | 0.33273  | -0.49533 | -3.08127 | C | 0.38038  | 1.84640 | -2.50280 |
| H | -1.16940 | -0.67508 | -4.61529 | H | -1.06273 | 3.09250 | -3.50919 |
|   |          |          |          | C | 0.57061  | 1.00065 | -1.43055 |
|   |          |          |          | H | 1.20662  | 2.07394 | -3.16207 |

|    |          |          |          |    |          |          |          |
|----|----------|----------|----------|----|----------|----------|----------|
| C  | 1.92603  | 0.35482  | -1.18966 | H  | 4.69418  | 0.02933  | 0.09928  |
| H  | 2.57232  | 0.58896  | -2.03076 | C  | 3.79686  | 2.20578  | 1.08652  |
| C  | 3.75515  | 1.54959  | 0.16434  | C  | 3.23426  | 3.34023  | 1.63424  |
| C  | 4.19928  | 1.98249  | 1.41187  | H  | 4.87140  | 2.09125  | 1.03038  |
| H  | 4.33554  | 1.72230  | -0.73210 | C  | 1.08069  | 2.39557  | 1.19199  |
| C  | 2.21422  | 1.07173  | 2.39198  | C  | 1.84149  | 3.43435  | 1.70379  |
| C  | 3.42043  | 1.74057  | 2.54008  | H  | 3.86228  | 4.13981  | 2.00673  |
| H  | 5.14433  | 2.50375  | 1.50012  | H  | -0.00089 | 2.45119  | 1.20217  |
| H  | 1.56691  | 0.85989  | 3.23393  | H  | 1.34865  | 4.29819  | 2.12867  |
| H  | 3.73335  | 2.06344  | 3.52365  | C  | 3.06812  | -1.28138 | -0.23717 |
| C  | 1.76694  | -1.15100 | -1.08014 | C  | 3.48714  | -3.59136 | -0.85238 |
| C  | 2.19804  | -3.42381 | -1.69392 | C  | 1.26950  | -2.74766 | -0.52179 |
| C  | 0.72010  | -2.88052 | 0.10874  | C  | 2.10845  | -3.81179 | -0.82426 |
| C  | 1.34420  | -3.83812 | -0.67607 | H  | 4.17213  | -4.39493 | -1.09278 |
| H  | 2.69333  | -4.15252 | -2.32324 | H  | 0.19481  | -2.87509 | -0.48741 |
| H  | 0.04105  | -3.14285 | 0.90882  | H  | 1.68367  | -4.78450 | -1.03269 |
| H  | 1.15172  | -4.88532 | -0.48690 | C  | 2.97761  | 1.15437  | 0.60500  |
| C  | 2.54054  | 0.88502  | 0.08982  | C  | 3.96468  | -2.32931 | -0.55807 |
| C  | 2.41208  | -2.06334 | -1.90198 | H  | 5.02714  | -2.12356 | -0.55659 |
| H  | 3.06886  | -1.70995 | -2.68561 | N  | -1.27423 | 0.88659  | -0.76802 |
| N  | -0.44136 | 0.69412  | -0.57303 | N  | 1.61360  | 1.28645  | 0.64497  |
| N  | 1.79709  | 0.65768  | 1.18230  | N  | 1.71679  | -1.51019 | -0.24474 |
| N  | 0.94458  | -1.57183 | -0.10331 | C  | -3.17155 | 1.51586  | -1.90907 |
| C  | -1.92393 | 2.00227  | -1.88546 | H  | -4.24262 | 1.54566  | -2.05938 |
| H  | -2.91202 | 2.38850  | -2.07437 | C  | -3.22438 | -0.03671 | 0.18166  |
| C  | -2.88272 | 0.53372  | -0.10902 | C  | -4.59535 | 0.04373  | 0.48240  |
| C  | -4.20112 | 0.82188  | -0.52409 | C  | -2.41422 | -1.03222 | 0.82981  |
| C  | -2.73574 | -0.37483 | 0.97338  | C  | -5.19007 | -0.81077 | 1.39616  |
| C  | -5.30274 | 0.25343  | 0.09122  | H  | -5.19392 | 0.80374  | -0.00750 |
| H  | -4.38163 | 1.48880  | -1.35384 | C  | -3.05260 | -1.89365 | 1.74763  |
| C  | -3.85908 | -0.96545 | 1.58104  | C  | -4.40536 | -1.78442 | 2.02846  |
| C  | -5.13204 | -0.64792 | 1.15005  | H  | -6.24636 | -0.72394 | 1.61964  |
| H  | -6.29647 | 0.50246  | -0.25909 | H  | -2.44537 | -2.64939 | 2.23244  |
| H  | -3.68900 | -1.65348 | 2.39945  | H  | -4.85664 | -2.46132 | 2.74578  |
| H  | -5.99331 | -1.09791 | 1.62921  | O  | -1.11200 | -1.22913 | 0.60446  |
| O  | -1.55020 | -0.65543 | 1.48876  | Cr | 0.24485  | -0.03063 | -0.11461 |
| Co | 0.08670  | -0.25692 | 0.96679  |    |          |          |          |

HL Cr(III)

$\Delta G = -2131.748214$

HL Cr(II)

$\Delta G = -2131.841939$

|   |          |          |          |   |          |         |          |
|---|----------|----------|----------|---|----------|---------|----------|
| C | -2.61311 | 0.82762  | -0.82218 | C | -1.81195 | 0.75885 | -1.05313 |
| C | -2.31369 | 2.10345  | -2.84701 | C | -0.95621 | 1.81468 | -3.06277 |
| C | -0.91571 | 1.96995  | -2.78055 | C | 0.32234  | 1.36893 | -2.73834 |
| H | -2.75251 | 2.61992  | -3.69416 | H | -1.12510 | 2.39131 | -3.96360 |
| C | -0.41397 | 1.28592  | -1.67224 | C | 0.50294  | 0.68999 | -1.54882 |
| H | -0.28191 | 2.34259  | -3.57438 | H | 1.16783  | 1.56186 | -3.38431 |
| C | 3.61325  | -0.02101 | 0.12526  | C | 1.90623  | 0.23119 | -1.16067 |
|   |          |          |          | H | 2.55049  | 0.40794 | -2.01776 |

|    |          |          |          |
|----|----------|----------|----------|
| C  | 3.55931  | 1.85265  | -0.07299 |
| C  | 3.96072  | 2.56049  | 1.05714  |
| H  | 4.10872  | 1.92405  | -1.00231 |
| C  | 2.10919  | 1.62498  | 2.24349  |
| C  | 3.22620  | 2.44469  | 2.23376  |
| H  | 4.83745  | 3.19496  | 1.01804  |
| H  | 1.50242  | 1.50399  | 3.13271  |
| H  | 3.50576  | 2.97803  | 3.13214  |
| C  | 1.95580  | -1.25276 | -0.83443 |
| C  | 2.74131  | -3.48956 | -1.17763 |
| C  | 1.21237  | -2.95745 | 0.58057  |
| C  | 1.97130  | -3.90072 | -0.09342 |
| H  | 3.34283  | -4.20365 | -1.72625 |
| H  | 0.59042  | -3.22189 | 1.42691  |
| H  | 1.95157  | -4.93279 | 0.22894  |
| C  | 2.43239  | 1.04626  | 0.00853  |
| C  | 2.73397  | -2.14902 | -1.55421 |
| H  | 3.32263  | -1.80049 | -2.39235 |
| N  | -0.53002 | 0.42784  | -0.70335 |
| N  | 1.72632  | 0.94041  | 1.14772  |
| N  | 1.21184  | -1.66190 | 0.21086  |
| C  | -2.01042 | 1.50501  | -2.22856 |
| H  | -3.00049 | 1.84988  | -2.48050 |
| C  | -2.97805 | 0.32935  | -0.25623 |
| C  | -4.26776 | 0.35723  | -0.82931 |
| C  | -2.87665 | -0.15538 | 1.07012  |
| C  | -5.39317 | -0.03659 | -0.12424 |
| H  | -4.39666 | 0.66319  | -1.85757 |
| C  | -4.01866 | -0.54207 | 1.78572  |
| C  | -5.26993 | -0.48012 | 1.19616  |
| H  | -6.36288 | -0.00813 | -0.60530 |
| H  | -3.88736 | -0.89594 | 2.80066  |
| H  | -6.14603 | -0.78795 | 1.75461  |
| O  | -1.69538 | -0.26814 | 1.68852  |
| Cr | 0.01820  | -0.25615 | 1.13320  |

HL Cu(II)

$\Delta G = -2727.87861$

|   |          |         |          |
|---|----------|---------|----------|
| C | -1.81960 | 0.07834 | -1.34054 |
| C | -0.98099 | 0.42758 | -3.58194 |
| C | 0.32469  | 0.30534 | -3.10593 |
| H | -1.16015 | 0.62046 | -4.63288 |
| C | 0.50641  | 0.07836 | -1.75037 |
| H | 1.17664  | 0.40446 | -3.76523 |
| C | 1.90869  | 0.01993 | -1.14005 |
| H | 2.61604  | 0.05808 | -1.96560 |
| C | 3.14016  | 2.18570 | -0.60788 |

|    |          |          |          |
|----|----------|----------|----------|
| C  | 3.34807  | 3.28071  | 0.22667  |
| H  | 3.71118  | 2.06514  | -1.51966 |
| C  | 1.65228  | 2.41874  | 1.67343  |
| C  | 2.59212  | 3.40187  | 1.38876  |
| H  | 4.09021  | 4.02732  | -0.02929 |
| H  | 1.03784  | 2.46963  | 2.56445  |
| H  | 2.72303  | 4.23733  | 2.06401  |
| C  | 2.16540  | -1.27415 | -0.38266 |
| C  | 3.38196  | -3.30982 | -0.01373 |
| C  | 1.57374  | -2.65193 | 1.40281  |
| C  | 2.56780  | -3.56518 | 1.08626  |
| H  | 4.16653  | -4.00340 | -0.29060 |
| H  | 0.91136  | -2.80578 | 2.24553  |
| H  | 2.69278  | -4.45379 | 1.69041  |
| C  | 2.17997  | 1.24168  | -0.25182 |
| C  | 3.17907  | -2.15119 | -0.75681 |
| H  | 3.79751  | -1.92521 | -1.61553 |
| N  | -0.54226 | -0.05300 | -0.91757 |
| N  | 1.45377  | 1.36301  | 0.87198  |
| N  | 1.38150  | -1.53352 | 0.68138  |
| C  | -2.04805 | 0.33247  | -2.70559 |
| H  | -3.05515 | 0.47764  | -3.06764 |
| C  | -2.92869 | -0.02084 | -0.37046 |
| C  | -4.21386 | -0.36814 | -0.83765 |
| C  | -2.77173 | 0.26485  | 1.02194  |
| C  | -5.32170 | -0.40606 | -0.00792 |
| H  | -4.33964 | -0.63480 | -1.87961 |
| C  | -3.92003 | 0.24701  | 1.84456  |
| C  | -5.16843 | -0.07964 | 1.34459  |
| H  | -6.28937 | -0.68867 | -0.40374 |
| H  | -3.78520 | 0.48851  | 2.89249  |
| H  | -6.02443 | -0.09399 | 2.01051  |
| O  | -1.61710 | 0.57897  | 1.60233  |
| Cu | -0.05059 | -0.20841 | 1.02135  |

HL Fe(II)

$\Delta G = -2351.116474$

|   |          |          |          |
|---|----------|----------|----------|
| C | -1.81913 | -0.40315 | -1.24833 |
| C | -1.00886 | -0.66204 | -3.51500 |
| C | 0.30060  | -0.56484 | -3.04308 |
| H | -1.20032 | -0.78125 | -4.57465 |
| C | 0.49936  | -0.39354 | -1.68369 |
| H | 1.14550  | -0.59749 | -3.71798 |
| C | 1.90998  | -0.18984 | -1.13229 |
| H | 2.59874  | -0.29128 | -1.96830 |
| C | 2.99899  | 2.11255  | -1.11497 |
| C | 3.14188  | 3.37411  | -0.54387 |

|    |          |          |          |    |          |          |          |
|----|----------|----------|----------|----|----------|----------|----------|
| H  | 3.57951  | 1.82640  | -1.98280 | C  | -1.85189 | 1.82958  | -2.10847 |
| C  | 1.48964  | 2.75967  | 1.06973  | C  | -2.92516 | 2.70608  | -2.11199 |
| C  | 2.37473  | 3.70565  | 0.56914  | H  | -4.58076 | 3.45358  | -0.95604 |
| H  | 3.84186  | 4.08638  | -0.96383 | H  | -1.18685 | 1.72687  | -2.95778 |
| H  | 0.86620  | 2.97128  | 1.93022  | H  | -3.11587 | 3.31396  | -2.98582 |
| H  | 2.45550  | 4.67499  | 1.04337  | C  | -2.02374 | -1.25016 | 0.72451  |
| C  | 2.27124  | -1.23956 | -0.09996 | C  | -2.89238 | -3.47996 | 0.78637  |
| C  | 3.61623  | -3.04167 | 0.73578  | C  | -1.21861 | -2.83408 | -0.79436 |
| C  | 1.77060  | -2.16026 | 1.97396  | C  | -2.05050 | -3.81122 | -0.27115 |
| C  | 2.81777  | -3.06275 | 1.87705  | H  | -3.55519 | -4.22224 | 1.21335  |
| H  | 4.44221  | -3.73397 | 0.62814  | H  | -0.54331 | -3.03860 | -1.61514 |
| H  | 1.12232  | -2.14089 | 2.84220  | H  | -2.03179 | -4.80735 | -0.69164 |
| H  | 2.99731  | -3.76397 | 2.68118  | C  | -2.35881 | 1.12163  | 0.05848  |
| C  | 2.09424  | 1.21605  | -0.55211 | C  | -2.88035 | -2.18233 | 1.29183  |
| C  | 3.33994  | -2.11650 | -0.26529 | H  | -3.52546 | -1.89400 | 2.11092  |
| H  | 3.94206  | -2.06926 | -1.16344 | N  | 0.48960  | 0.34295  | 0.76743  |
| N  | -0.53279 | -0.35765 | -0.80959 | N  | -1.58197 | 1.06233  | -1.03537 |
| N  | 1.35590  | 1.54087  | 0.52449  | N  | -1.21276 | -1.58304 | -0.29586 |
| N  | 1.50066  | -1.26694 | 1.00225  | C  | 1.99554  | 1.12508  | 2.44456  |
| C  | -2.06202 | -0.55889 | -2.62636 | H  | 2.99674  | 1.37803  | 2.75264  |
| H  | -3.07716 | -0.56348 | -2.99480 | C  | 2.93949  | 0.25584  | 0.31568  |
| C  | -2.93136 | -0.23282 | -0.29783 | C  | 4.25075  | 0.29327  | 0.83243  |
| C  | -4.21079 | -0.72415 | -0.63660 | C  | 2.80394  | -0.13614 | -1.03820 |
| C  | -2.78811 | 0.50006  | 0.92280  | C  | 5.35533  | -0.00791 | 0.05120  |
| C  | -5.32760 | -0.48408 | 0.14490  | H  | 4.42456  | 0.53985  | 1.86910  |
| H  | -4.32446 | -1.32460 | -1.53079 | C  | 3.92485  | -0.43345 | -1.83210 |
| C  | -3.95016 | 0.76390  | 1.68555  | C  | 5.19511  | -0.36590 | -1.29249 |
| C  | -5.19166 | 0.28534  | 1.30867  | H  | 6.34375  | 0.02897  | 0.49176  |
| H  | -6.29082 | -0.88769 | -0.14235 | H  | 3.75625  | -0.71973 | -2.86253 |
| H  | -3.82842 | 1.34613  | 2.59184  | H  | 6.05805  | -0.59954 | -1.90421 |
| H  | -6.05798 | 0.49637  | 1.92643  | O  | 1.61208  | -0.24585 | -1.61458 |
| O  | -1.63445 | 0.96853  | 1.37208  | Fe | -0.04052 | -0.18230 | -1.04051 |
| Fe | -0.05445 | 0.01118  | 1.08576  |    |          |          |          |

HL K(I)

$\Delta G = -1687.507056$

HL Fe (III)

$\Delta G = -2350.913228$

|   |          |         |          |   |          |          |          |
|---|----------|---------|----------|---|----------|----------|----------|
| C | 1.77896  | 0.57874 | 1.16603  | C | -2.02651 | -0.83465 | -0.38030 |
| C | 0.95255  | 1.34881 | 3.31741  | C | -1.20473 | -2.98018 | -1.11781 |
| C | -0.33828 | 1.01937 | 2.92006  | C | 0.08032  | -2.45583 | -1.09647 |
| H | 1.14010  | 1.76660 | 4.29837  | H | -1.37564 | -4.00841 | -1.41708 |
| C | -0.53336 | 0.53146 | 1.64125  | C | 0.25404  | -1.12721 | -0.69224 |
| H | -1.18393 | 1.15051 | 3.58101  | H | 0.93386  | -3.05565 | -1.38996 |
| C | -1.94245 | 0.19373 | 1.18256  | C | 1.67608  | -0.54991 | -0.72342 |
| H | -2.61576 | 0.33368 | 2.02368  | H | 2.11943  | -0.92851 | -1.64796 |
| C | -3.45079 | 1.97448 | 0.12054  | C | 1.85196  | 1.55839  | -2.10125 |
| C | -3.73419 | 2.77872 | -0.98125 | C | 1.90352  | 2.94420  | -2.20625 |
| H | -4.06378 | 2.00656 | 1.01132  | H | 1.91072  | 0.93566  | -2.98602 |
|   |          |         |          | C | 1.71056  | 3.04053  | 0.17014  |

|   |          |          |          |    |          |          |          |
|---|----------|----------|----------|----|----------|----------|----------|
| C | 1.83360  | 3.70787  | -1.04432 | H  | 3.45051  | 4.42285  | -0.85791 |
| H | 2.00240  | 3.41770  | -3.17629 | H  | 0.74204  | 3.05468  | 2.18244  |
| H | 1.65291  | 3.60027  | 1.09931  | H  | 2.12643  | 4.88941  | 1.22555  |
| H | 1.87522  | 4.78958  | -1.07299 | C  | 2.34919  | -1.06092 | 0.01221  |
| C | 2.55697  | -1.08570 | 0.40423  | C  | 3.91764  | -2.75919 | 0.66913  |
| C | 4.68244  | -1.92345 | 1.16303  | C  | 1.99962  | -2.21004 | 1.98158  |
| C | 2.79947  | -1.69263 | 2.61142  | C  | 3.14579  | -2.97840 | 1.80673  |
| C | 4.12865  | -2.06217 | 2.43311  | H  | 4.81862  | -3.33497 | 0.49206  |
| H | 5.71338  | -2.19992 | 0.97426  | H  | 1.36842  | -2.34791 | 2.85353  |
| H | 2.33114  | -1.78489 | 3.58711  | H  | 3.41995  | -3.72420 | 2.54205  |
| H | 4.70580  | -2.44733 | 3.26444  | C  | 1.96445  | 1.41300  | -0.36789 |
| C | 1.72501  | 0.97129  | -0.83788 | C  | 3.51456  | -1.78757 | -0.24188 |
| C | 3.88583  | -1.43073 | 0.13507  | H  | 4.09252  | -1.59425 | -1.13719 |
| H | 4.28332  | -1.31783 | -0.86664 | N  | -0.55590 | -0.15534 | -0.68947 |
| N | -0.76559 | -0.34365 | -0.32843 | N  | 1.25888  | 1.66882  | 0.74475  |
| N | 1.65518  | 1.70641  | 0.28031  | N  | 1.60596  | -1.27296 | 1.10876  |
| N | 2.02538  | -1.21402 | 1.62761  | C  | -2.01396 | -0.97938 | -2.38868 |
| C | -2.27085 | -2.16133 | -0.76154 | H  | -3.00238 | -1.27890 | -2.70787 |
| H | -3.28599 | -2.53767 | -0.77547 | C  | -2.95119 | -0.18907 | -0.18853 |
| C | -3.16916 | 0.07478  | -0.09623 | C  | -4.21798 | 0.05207  | -0.76117 |
| C | -4.15841 | 0.21419  | -1.07913 | C  | -2.82430 | -0.17868 | 1.25457  |
| C | -3.29177 | 0.77147  | 1.16184  | C  | -5.36114 | 0.27350  | -0.00749 |
| C | -5.26475 | 1.04696  | -0.91405 | H  | -4.30266 | 0.09496  | -1.84130 |
| H | -4.04265 | -0.33186 | -2.01156 | C  | -4.03291 | 0.02658  | 1.99427  |
| C | -4.43853 | 1.61970  | 1.29042  | C  | -5.25640 | 0.24795  | 1.39162  |
| C | -5.38900 | 1.75336  | 0.28910  | H  | -6.30968 | 0.47116  | -0.49287 |
| H | -6.00294 | 1.14753  | -1.70134 | H  | -3.94704 | 0.01439  | 3.07648  |
| H | -4.55089 | 2.15977  | 2.22647  | H  | -6.13700 | 0.41152  | 2.00596  |
| H | -6.23966 | 2.41148  | 0.44460  | O  | -1.71344 | -0.35735 | 1.89154  |
| O | -2.45013 | 0.62783  | 2.12853  | Li | -0.02423 | 0.05332  | 1.26671  |
| K | 0.05629  | 0.70749  | 2.46027  |    |          |          |          |

HL Mg (II)

$\Delta G = -1287.592403$

HL Li (I)

$\Delta G = -1095.118333$

|   |          |          |          |   |          |          |          |
|---|----------|----------|----------|---|----------|----------|----------|
| C | -1.81177 | -0.44621 | -1.09669 | C | -1.82719 | 0.34534  | -1.16132 |
| C | -0.93878 | -1.13848 | -3.24663 | C | -0.96648 | 0.86788  | -3.36624 |
| C | 0.34204  | -0.78946 | -2.81847 | C | 0.32238  | 0.58327  | -2.91708 |
| H | -1.09150 | -1.54170 | -4.24153 | H | -1.13162 | 1.18016  | -4.39078 |
| C | 0.48338  | -0.31690 | -1.51711 | C | 0.48276  | 0.23664  | -1.58405 |
| H | 1.20197  | -0.89971 | -3.46710 | H | 1.17681  | 0.64977  | -3.57750 |
| C | 1.87630  | 0.01144  | -0.96930 | C | 1.88989  | -0.01972 | -1.03202 |
| H | 2.56177  | -0.01300 | -1.81592 | H | 2.56241  | -0.00795 | -1.88745 |
| C | 2.76531  | 2.38526  | -0.97223 | C | 3.45349  | 1.88710  | -0.42017 |
| C | 2.83458  | 3.65441  | -0.40545 | C | 3.82993  | 2.91036  | 0.44460  |
| H | 3.32386  | 2.14958  | -1.86976 | H | 4.01115  | 1.69390  | -1.32740 |
| C | 1.32989  | 2.89266  | 1.28465  | C | 1.99413  | 2.31127  | 1.84929  |
| C | 2.10266  | 3.91762  | 0.74886  | C | 3.08705  | 3.12991  | 1.60088  |
|   |          |          |          | H | 4.69131  | 3.52666  | 0.21662  |



|    |          |          |          |    |          |          |          |
|----|----------|----------|----------|----|----------|----------|----------|
| H  | 1.38628  | 2.44151  | 2.73671  | H  | 1.34755  | 4.96056  | -1.12736 |
| H  | 3.34465  | 3.91566  | 2.29863  | C  | 2.85820  | -0.83756 | 0.19258  |
| C  | 2.03572  | -1.39321 | -0.37993 | C  | 4.50767  | -2.01693 | 1.45909  |
| C  | 3.00726  | -3.58846 | -0.30022 | C  | 2.51976  | -1.15576 | 2.48554  |
| C  | 1.42894  | -2.84422 | 1.32821  | C  | 3.73419  | -1.81579 | 2.60558  |
| C  | 2.26268  | -3.84379 | 0.84728  | H  | 5.45074  | -2.54625 | 1.52659  |
| H  | 3.66934  | -4.34302 | -0.70762 | H  | 1.86218  | -1.00368 | 3.33274  |
| H  | 0.82755  | -2.99574 | 2.21678  | H  | 4.06078  | -2.17581 | 3.57226  |
| H  | 2.32167  | -4.79371 | 1.36193  | C  | 2.06951  | 1.20160  | -1.14413 |
| C  | 2.34324  | 1.10782  | -0.10493 | C  | 4.06613  | -1.53684 | 0.23142  |
| C  | 2.89313  | -2.34831 | -0.92154 | H  | 4.63986  | -1.68418 | -0.67451 |
| H  | 3.46116  | -2.12235 | -1.81472 | N  | -1.12196 | -1.02957 | -0.96729 |
| N  | -0.55605 | 0.13123  | -0.73317 | N  | 1.19752  | 1.72753  | -0.25468 |
| N  | 1.62980  | 1.32154  | 1.01660  | N  | 2.10377  | -0.67887 | 1.30378  |
| N  | 1.31721  | -1.64602 | 0.73068  | C  | -3.26193 | -1.75758 | -1.62830 |
| C  | -2.03346 | 0.75959  | -2.49386 | H  | -4.33416 | -1.78503 | -1.49997 |
| H  | -3.02640 | 1.00977  | -2.83617 | C  | -3.04271 | -0.10898 | 0.27690  |
| C  | -2.98115 | 0.13663  | -0.25510 | C  | -4.39766 | 0.27944  | 0.19891  |
| C  | -4.23905 | -0.13182 | -0.84221 | C  | -2.27401 | 0.33615  | 1.39526  |
| C  | -2.90704 | 0.20239  | 1.17858  | C  | -5.00154 | 1.04710  | 1.17932  |
| C  | -5.39935 | -0.28546 | -0.10239 | H  | -4.98275 | -0.01142 | -0.66429 |
| H  | -4.30297 | -0.25032 | -1.91654 | C  | -2.91453 | 1.10473  | 2.39145  |
| C  | -4.11898 | 0.07338  | 1.90736  | C  | -4.24998 | 1.45240  | 2.29002  |
| C  | -5.33346 | -0.16386 | 1.29198  | H  | -6.04107 | 1.33470  | 1.08113  |
| H  | -6.33773 | -0.50248 | -0.59835 | H  | -2.31822 | 1.41964  | 3.23985  |
| H  | -4.05042 | 0.15415  | 2.98679  | H  | -4.70927 | 2.05034  | 3.06959  |
| H  | -6.23092 | -0.26874 | 1.89294  | O  | -0.99093 | 0.04740  | 1.56583  |
| O  | -1.79915 | 0.39135  | 1.85553  | Mn | 0.34125  | -0.20932 | 0.22882  |
| Mg | -0.00521 | -0.05514 | 1.33337  |    |          |          |          |

HL Mn (II)

$\Delta G = -2238.333752$

|   |          |          |          |
|---|----------|----------|----------|
| C | -2.48074 | -0.96433 | -0.77353 |
| C | -2.67945 | -2.53532 | -2.62389 |
| C | -1.28935 | -2.56583 | -2.79056 |
| H | -3.31065 | -3.13699 | -3.26877 |
| C | -0.60473 | -1.77523 | -1.89583 |
| H | -0.80131 | -3.16524 | -3.54571 |
| C | 2.20913  | -0.26771 | -1.01107 |
| H | 2.41322  | -0.79659 | -1.93663 |
| C | 2.68906  | 1.99531  | -2.11231 |
| C | 2.43362  | 3.36193  | -2.10441 |
| H | 3.35865  | 1.54852  | -2.83599 |
| C | 0.94382  | 3.04321  | -0.25444 |
| C | 1.55927  | 3.89982  | -1.15688 |
| H | 2.91273  | 4.00744  | -2.83103 |
| H | 0.23030  | 3.40111  | 0.47814  |

HL Na (I)

$\Delta G = -1249.873668$

|   |          |          |          |
|---|----------|----------|----------|
| C | -1.84766 | -0.73102 | -1.02458 |
| C | -0.90390 | -1.77723 | -2.98748 |
| C | 0.34481  | -1.29969 | -2.60178 |
| H | -1.01256 | -2.36405 | -3.89285 |
| C | 0.43948  | -0.56726 | -1.41614 |
| H | 1.22568  | -1.49365 | -3.20136 |
| C | 1.82433  | -0.05766 | -0.99094 |
| H | 2.44719  | -0.14242 | -1.88138 |
| C | 2.41708  | 2.33995  | -1.51152 |
| C | 2.44530  | 3.69023  | -1.17837 |
| H | 2.82995  | 1.99647  | -2.45231 |
| C | 1.36455  | 3.11637  | 0.86977  |
| C | 1.90870  | 4.09224  | 0.04136  |
| H | 2.88103  | 4.41323  | -1.85823 |
| H | 0.93450  | 3.38732  | 1.82929  |
| H | 1.90967  | 5.13098  | 0.34708  |

|    |          |          |          |    |          |          |          |
|----|----------|----------|----------|----|----------|----------|----------|
| C  | 2.48685  | -0.95676 | 0.05455  | C  | 3.34594  | -3.29035 | 0.27172  |
| C  | 4.33325  | -2.34946 | 0.72496  | C  | 1.42184  | -2.57119 | 1.49543  |
| C  | 2.42885  | -1.98572 | 2.11586  | C  | 2.44276  | -3.49010 | 1.31373  |
| C  | 3.66656  | -2.59061 | 1.92271  | H  | 4.15286  | -3.99265 | 0.10217  |
| H  | 5.29989  | -2.79846 | 0.52794  | H  | 0.69093  | -2.68070 | 2.28732  |
| H  | 1.87584  | -2.14667 | 3.03628  | H  | 2.51958  | -4.34286 | 1.97475  |
| H  | 4.08886  | -3.22912 | 2.68844  | C  | 2.19280  | 1.21628  | -0.29814 |
| C  | 1.84987  | 1.42448  | -0.61801 | C  | 3.20100  | -2.17869 | -0.55156 |
| C  | 3.73621  | -1.52276 | -0.22129 | H  | 3.88651  | -1.99410 | -1.36825 |
| H  | 4.22909  | -1.31940 | -1.16423 | N  | -0.53201 | -0.15542 | -0.89547 |
| N  | -0.62322 | -0.29640 | -0.64844 | N  | 1.52863  | 1.34711  | 0.86032  |
| N  | 1.33119  | 1.81439  | 0.55510  | N  | 1.28805  | -1.49778 | 0.69526  |
| N  | 1.84736  | -1.18828 | 1.20976  | C  | -2.03946 | 0.11821  | -2.71237 |
| C  | -2.00651 | -1.49552 | -2.19518 | H  | -3.05165 | 0.22340  | -3.07551 |
| H  | -2.98592 | -1.86830 | -2.46539 | C  | -2.91120 | -0.05575 | -0.36323 |
| C  | -3.04002 | -0.36529 | -0.21990 | C  | -4.20304 | -0.45979 | -0.74902 |
| C  | -4.19128 | 0.05493  | -0.90810 | C  | -2.70775 | 0.42038  | 0.96505  |
| C  | -3.06603 | -0.47075 | 1.22269  | C  | -5.28196 | -0.38044 | 0.11741  |
| C  | -5.37397 | 0.39598  | -0.25925 | H  | -4.35651 | -0.85981 | -1.74423 |
| H  | -4.14574 | 0.13816  | -1.98999 | C  | -3.82235 | 0.51858  | 1.82366  |
| C  | -4.30653 | -0.12294 | 1.84961  | C  | -5.08485 | 0.12760  | 1.40740  |
| C  | -5.41772 | 0.29806  | 1.13861  | H  | -6.26255 | -0.71154 | -0.20157 |
| H  | -6.23478 | 0.73558  | -0.82346 | H  | -3.65765 | 0.90161  | 2.82402  |
| H  | -4.34630 | -0.20351 | 2.93209  | H  | -5.92054 | 0.20422  | 2.09450  |
| H  | -6.32886 | 0.55520  | 1.67177  | O  | -1.52039 | 0.81100  | 1.41979  |
| O  | -2.06271 | -0.87501 | 1.92679  | Ni | -0.09763 | -0.21265 | 0.96915  |
| Na | -0.11198 | 0.19909  | 1.72317  |    |          |          |          |

HL V(II)

$\Delta G = -2031.393522$

HL Ni(II)

$\Delta G = -2595.691069$

|   |          |          |          |   |          |          |          |
|---|----------|----------|----------|---|----------|----------|----------|
| C | -1.81019 | -0.04967 | -1.33722 | C | -2.24791 | 0.75281  | -1.21152 |
| C | -0.97339 | 0.18746  | -3.59197 | C | -1.42338 | 1.39728  | -3.38327 |
| C | 0.32986  | 0.12695  | -3.10078 | C | -0.08955 | 1.33642  | -2.94750 |
| H | -1.15104 | 0.31680  | -4.65267 | H | -1.63080 | 1.68952  | -4.40746 |
| C | 0.51764  | -0.03288 | -1.73644 | C | 0.12743  | 0.94961  | -1.61900 |
| H | 1.18382  | 0.21548  | -3.75889 | H | 0.72192  | 1.59090  | -3.61761 |
| C | 1.92124  | -0.04553 | -1.13489 | C | 3.17594  | -1.11686 | -0.32491 |
| H | 2.62699  | -0.04720 | -1.96291 | H | 4.05429  | -1.59278 | -0.74262 |
| C | 3.09560  | 2.17979  | -0.74322 | C | 4.72682  | 0.69688  | 0.15950  |
| C | 3.31011  | 3.31085  | 0.04005  | C | 5.01410  | 1.92913  | 0.71663  |
| H | 3.61836  | 2.04652  | -1.68196 | H | 5.50852  | 0.09208  | -0.28126 |
| C | 1.73271  | 2.43794  | 1.60987  | C | 2.69028  | 2.14796  | 1.24259  |
| C | 2.61690  | 3.44528  | 1.23924  | C | 3.97759  | 2.66840  | 1.28810  |
| H | 4.00848  | 4.07354  | -0.28316 | H | 6.02780  | 2.31018  | 0.71119  |
| H | 1.16960  | 2.49885  | 2.53415  | H | 1.85995  | 2.72015  | 1.64403  |
| H | 2.75578  | 4.30739  | 1.87884  | H | 4.14991  | 3.63432  | 1.74315  |
| C | 2.15431  | -1.29331 | -0.31168 | C | 2.03517  | -1.96027 | -0.25108 |
|   |          |          |          | C | 1.15402  | -4.21237 | -0.48803 |

|   |          |          |          |   |          |          |         |
|---|----------|----------|----------|---|----------|----------|---------|
| C | -0.17590 | -2.41460 | 0.36822  | C | 5.09002  | -2.92574 | 3.68552 |
| C | -0.05664 | -3.75678 | 0.04109  | H | 5.94997  | -4.21937 | 2.17324 |
| H | 1.27891  | -5.24950 | -0.77340 | H | 4.10587  | -1.42408 | 4.88522 |
| H | -1.10587 | -2.02239 | 0.75724  | H | 5.16049  | -3.64887 | 4.48661 |
| H | -0.89972 | -4.41869 | 0.18632  | C | 5.02128  | 1.46412  | 0.96813 |
| C | 3.40365  | 0.19726  | 0.17533  | C | 5.48135  | -2.29412 | 1.38905 |
| C | 2.19331  | -3.31636 | -0.63280 | H | 5.84131  | -2.49577 | 0.38884 |
| H | 3.15092  | -3.63639 | -1.02226 | N | 1.30857  | 0.52469  | 2.67267 |
| N | -0.94533 | 0.66740  | -0.91738 | N | 4.48208  | 1.95597  | 2.14326 |
| N | 2.39295  | 0.95743  | 0.69790  | N | 4.43676  | -0.76706 | 2.93959 |
| N | 0.82088  | -1.52187 | 0.21730  | C | -0.94382 | 0.27571  | 2.63994 |
| C | -2.50765 | 1.12633  | -2.53850 | H | -1.93639 | 0.31081  | 3.06825 |
| H | -3.51999 | 1.22845  | -2.90603 | C | 0.41224  | 1.07145  | 4.75660 |
| C | -3.14785 | 0.49109  | -0.08898 | C | -0.62456 | 1.26525  | 5.67744 |
| C | -4.54083 | 0.42084  | -0.26920 | C | 1.75804  | 1.29941  | 5.18637 |
| C | -2.60509 | 0.33254  | 1.23097  | C | -0.35709 | 1.67046  | 6.97823 |
| C | -5.40408 | 0.20449  | 0.79263  | H | -1.64856 | 1.09526  | 5.36858 |
| H | -4.94616 | 0.53553  | -1.26812 | C | 2.01269  | 1.70779  | 6.50075 |
| C | -3.50713 | 0.11551  | 2.29323  | C | 0.96204  | 1.89150  | 7.38779 |
| C | -4.87540 | 0.05319  | 2.08106  | H | -1.17328 | 1.81370  | 7.67506 |
| H | -6.47314 | 0.15248  | 0.62631  | H | 3.04007  | 1.87156  | 6.80018 |
| H | -3.09390 | 0.00046  | 3.28871  | H | 1.16968  | 2.20669  | 8.40304 |
| H | -5.53797 | -0.11558 | 2.92299  | O | 2.84721  | 1.13699  | 4.38917 |
| O | -1.30401 | 0.39152  | 1.52607  | V | 3.17500  | 0.64932  | 2.68924 |
| V | 0.32637  | 0.47710  | 0.48428  |   |          |          |         |

HL Zn(II)

$\Delta G = -2866.763982$

HL V(III)

$\Delta G = -2031.169819$

|   |          |          |          |   |          |          |          |
|---|----------|----------|----------|---|----------|----------|----------|
| C | 0.18402  | 0.63359  | 3.38651  | C | -1.94475 | -0.63744 | -0.76869 |
| C | -0.77247 | -0.14856 | 1.30564  | C | -1.27179 | -1.90409 | -2.72145 |
| C | 0.47611  | -0.24365 | 0.67392  | C | 0.06729  | -1.67647 | -2.40133 |
| H | -1.65839 | -0.42396 | 0.74511  | H | -1.53009 | -2.48391 | -3.59975 |
| C | 1.56437  | 0.13284  | 1.47258  | C | 0.33834  | -0.88290 | -1.29790 |
| H | 0.57605  | -0.58623 | -0.34565 | H | 0.86887  | -2.08375 | -3.00302 |
| C | 5.10231  | 0.06579  | 0.76350  | C | 1.77988  | -0.52584 | -0.91902 |
| H | 5.40021  | -0.23227 | -0.23435 | H | 2.43248  | -1.12717 | -1.54842 |
| C | 5.51381  | 2.38100  | 0.00182  | C | 3.04127  | 1.29332  | -2.17763 |
| C | 5.59736  | 3.71178  | 0.32097  | C | 3.27070  | 2.64169  | -2.43516 |
| H | 5.85851  | 2.00229  | -0.95128 | H | 3.59543  | 0.52518  | -2.70107 |
| C | 4.59290  | 3.27670  | 2.46177  | C | 1.59880  | 3.17512  | -0.81478 |
| C | 5.16364  | 4.16474  | 1.58963  | C | 2.53744  | 3.60133  | -1.74317 |
| H | 6.00741  | 4.41709  | -0.39074 | H | 4.01229  | 2.93735  | -3.16735 |
| H | 4.18844  | 3.56893  | 3.42151  | H | 1.00219  | 3.88042  | -0.25003 |
| H | 5.25332  | 5.20556  | 1.86953  | H | 2.68452  | 4.65929  | -1.91508 |
| C | 4.99657  | -0.99440 | 1.69401  | C | 2.11716  | -0.87120 | 0.53099  |
| C | 5.54270  | -3.23799 | 2.38095  | C | 3.36765  | -2.11437 | 2.16146  |
| C | 4.52418  | -1.70314 | 3.92777  | C | 1.74636  | -0.47913 | 2.79487  |
|   |          |          |          | C | 2.69227  | -1.42484 | 3.16397  |

|    |          |          |          |   |          |          |          |
|----|----------|----------|----------|---|----------|----------|----------|
| H  | 4.11258  | -2.86024 | 2.41090  | C | -2.66742 | 0.46006  | 0.36219  |
| H  | 1.19179  | 0.08392  | 3.53517  | C | -1.30260 | -1.63407 | -1.28763 |
| H  | 2.88922  | -1.61090 | 4.21143  | H | -1.59130 | -0.74013 | -1.82179 |
| C  | 2.08234  | 0.93823  | -1.23310 | N | 0.77569  | 0.27533  | 0.62718  |
| C  | 3.07729  | -1.83447 | 0.82921  | N | -2.30216 | 1.38528  | -0.53834 |
| H  | 3.58831  | -2.35396 | 0.02894  | N | -0.88448 | -2.73188 | 0.80210  |
| N  | -0.63880 | -0.37404 | -0.52794 | C | 1.86337  | 1.84526  | 2.07572  |
| N  | 1.37902  | 1.87303  | -0.56752 | H | 2.74986  | 2.41615  | 2.32343  |
| N  | 1.46727  | -0.21009 | 1.50928  | C | 3.11302  | 0.79902  | 0.16900  |
| C  | -2.27243 | -1.38505 | -1.91893 | C | 4.27973  | 0.40592  | 0.83560  |
| H  | -3.30521 | -1.54793 | -2.18809 | C | 3.13153  | 1.04964  | -1.25913 |
| C  | -2.98874 | -0.17477 | 0.17595  | C | 5.48838  | 0.18954  | 0.17168  |
| C  | -4.22037 | -0.87160 | 0.16844  | H | 4.23065  | 0.24210  | 1.90925  |
| C  | -2.84413 | 0.91496  | 1.10126  | C | 4.39201  | 0.79945  | -1.90301 |
| C  | -5.29185 | -0.52697 | 0.97292  | C | 5.52363  | 0.38750  | -1.21528 |
| H  | -4.32883 | -1.73546 | -0.47445 | H | 6.36934  | -0.13247 | 0.71513  |
| C  | -3.96923 | 1.26125  | 1.89367  | H | 4.43665  | 0.96494  | -2.97627 |
| C  | -5.16232 | 0.56740  | 1.83742  | H | 6.44866  | 0.22084  | -1.76153 |
| H  | -6.20842 | -1.10315 | 0.93661  | O | 2.12087  | 1.49557  | -1.91264 |
| H  | -3.84745 | 2.10107  | 2.56869  | N | -0.14279 | -4.92468 | 0.91388  |
| H  | -5.98883 | 0.86418  | 2.47455  | H | -0.41487 | -4.88073 | 1.88591  |
| O  | -1.76293 | 1.65472  | 1.27058  | N | -2.81945 | 3.05536  | -2.05658 |
| Zn | 0.00396  | 1.10734  | 0.80495  | H | -1.83140 | 3.26516  | -2.04204 |
|    |          |          |          | H | -0.23351 | -5.84336 | 0.50522  |
|    |          |          |          | H | -3.41020 | 3.85354  | -2.23744 |

HL-NH2

$\Delta G = -1198.346393$

|   |          |          |          |
|---|----------|----------|----------|
| C | 1.87302  | 0.98604  | 0.96774  |
| C | 0.70793  | 1.95571  | 2.84369  |
| C | -0.41193 | 1.21679  | 2.48521  |
| H | 0.68251  | 2.60960  | 3.70884  |
| C | -0.33459 | 0.39026  | 1.35736  |
| H | -1.32842 | 1.27520  | 3.06101  |
| C | -1.57283 | -0.42201 | 0.95959  |
| H | -1.97900 | -0.83215 | 1.88778  |
| C | -3.99248 | 0.28115  | 0.75577  |
| C | -4.97098 | 1.09625  | 0.17938  |
| H | -4.25254 | -0.46843 | 1.49256  |
| C | -3.24400 | 2.16100  | -1.09258 |
| C | -4.60795 | 2.04791  | -0.75632 |
| H | -6.01110 | 0.98757  | 0.46637  |
| H | -5.34332 | 2.69463  | -1.21970 |
| C | -1.23973 | -1.64033 | 0.10255  |
| C | -0.96995 | -2.80789 | -1.96925 |
| C | -0.55923 | -3.85238 | 0.14361  |
| C | -0.58969 | -3.93463 | -1.26178 |
| H | -1.00741 | -2.83737 | -3.05279 |
| H | -0.32469 | -4.85678 | -1.76525 |

HL-NH2 Al (III)

$\Delta G = -1440.51567$

|   |          |          |          |
|---|----------|----------|----------|
| C | 1.85971  | -0.05368 | 1.47278  |
| C | 1.08015  | -0.14758 | 3.76276  |
| C | -0.25298 | -0.11383 | 3.33766  |
| H | 1.30292  | -0.19750 | 4.82151  |
| C | -0.48238 | -0.05651 | 1.98147  |
| H | -1.07243 | -0.13498 | 4.04253  |
| C | -1.87555 | -0.02599 | 1.33619  |
| H | -2.61282 | -0.04244 | 2.13369  |
| C | -3.08125 | 2.16090  | 0.85713  |
| C | -3.22618 | 3.31041  | 0.05150  |
| H | -3.72490 | 1.98891  | 1.70808  |
| C | -1.39283 | 2.57469  | -1.32160 |
| C | -2.40100 | 3.52140  | -1.02244 |
| H | -3.99580 | 4.03522  | 0.28675  |
| H | -2.49788 | 4.40020  | -1.64560 |
| C | -2.12043 | -1.26561 | 0.46463  |
| C | -3.26717 | -3.26861 | -0.13582 |
| C | -1.39974 | -2.49709 | -1.44130 |
| C | -2.42663 | -3.44108 | -1.20486 |

|    |          |          |          |    |          |          |          |
|----|----------|----------|----------|----|----------|----------|----------|
| H  | -4.05127 | -3.99186 | 0.05143  | C  | 3.09980  | 3.29696  | -0.26674 |
| H  | -2.52382 | -4.28905 | -1.86932 | C  | 1.19056  | 2.38858  | -1.41366 |
| C  | -2.10323 | 1.26208  | 0.53388  | C  | 2.16668  | 3.40252  | -1.27243 |
| C  | -3.11681 | -2.16372 | 0.72922  | H  | 3.85263  | 4.06766  | -0.14992 |
| H  | -3.76896 | -2.02621 | 1.58000  | H  | 2.16547  | 4.24083  | -1.95702 |
| N  | 0.55148  | -0.02771 | 1.10371  | C  | 2.10606  | -1.24635 | 0.42515  |
| N  | -1.27045 | 1.46235  | -0.54761 | C  | 3.08398  | 2.19692  | 0.60996  |
| N  | -1.27761 | -1.42308 | -0.61516 | H  | 3.81160  | 2.09755  | 1.40347  |
| C  | 2.12273  | -0.12046 | 2.85160  | N  | -0.42864 | -0.00021 | 1.11261  |
| H  | 3.13558  | -0.15436 | 3.21937  | N  | 1.17767  | -1.34038 | -0.56120 |
| C  | 2.91177  | -0.01241 | 0.42926  | N  | 1.17750  | 1.34062  | -0.56080 |
| C  | 4.26419  | 0.00509  | 0.83893  | C  | -1.97685 | -0.00066 | 2.89600  |
| C  | 2.66935  | 0.01151  | -0.97709 | H  | -2.98952 | -0.00082 | 3.26910  |
| C  | 5.31653  | 0.03481  | -0.05873 | C  | -2.76575 | -0.00015 | 0.47179  |
| H  | 4.50281  | -0.00074 | 1.89250  | C  | -4.12656 | -0.00014 | 0.84432  |
| C  | 3.73960  | 0.03880  | -1.87512 | C  | -2.45544 | 0.00003  | -0.92247 |
| C  | 5.05152  | 0.04915  | -1.42969 | C  | -5.15094 | 0.00001  | -0.08713 |
| H  | 6.33545  | 0.04738  | 0.30715  | H  | -4.39311 | -0.00023 | 1.89285  |
| H  | 3.50532  | 0.05256  | -2.93238 | C  | -3.51068 | 0.00017  | -1.85408 |
| H  | 5.86343  | 0.07067  | -2.14701 | C  | -4.83502 | 0.00015  | -1.45036 |
| O  | 1.42747  | 0.00855  | -1.55072 | H  | -6.18300 | 0.00002  | 0.24141  |
| N  | -0.55085 | -2.62393 | -2.47683 | H  | -3.24825 | 0.00029  | -2.90578 |
| H  | 0.27342  | -2.04855 | -2.57799 | H  | -5.62397 | 0.00026  | -2.19428 |
| N  | -0.56371 | 2.73759  | -2.36790 | O  | -1.20926 | 0.00009  | -1.41228 |
| H  | 0.24157  | 2.14785  | -2.52244 | N  | 0.26817  | 2.40789  | -2.40475 |
| H  | -0.59957 | -3.44318 | -3.06204 | H  | -0.49042 | 1.73641  | -2.38383 |
| H  | -0.60748 | 3.58586  | -2.91067 | N  | 0.26841  | -2.40725 | -2.40542 |
| Al | -0.04336 | 0.01859  | -0.67119 | H  | -0.49024 | -1.73585 | -2.38431 |
|    |          |          |          | H  | 0.15460  | 3.23936  | -2.96127 |
|    |          |          |          | H  | 0.15499  | -3.23852 | -2.96224 |
|    |          |          |          | Be | 0.05251  | 0.00005  | -0.51446 |

HL-NH2 Be (II)

$\Delta G = -1213.012537$

|   |          |          |          |
|---|----------|----------|----------|
| C | -1.71905 | -0.00035 | 1.51258  |
| C | -0.92420 | -0.00079 | 3.79658  |
| C | 0.39921  | -0.00061 | 3.34473  |
| H | -1.13074 | -0.00103 | 4.86023  |
| C | 0.60230  | -0.00032 | 1.97801  |
| H | 1.23396  | -0.00070 | 4.03256  |
| C | 1.96991  | -0.00011 | 1.29945  |
| H | 2.75265  | -0.00018 | 2.05362  |
| C | 3.08430  | -2.19676 | 0.60926  |
| C | 3.10025  | -3.29653 | -0.26778 |
| H | 3.81191  | -2.09752 | 1.40278  |
| C | 1.19084  | -2.38808 | -1.41437 |
| C | 2.16712  | -3.40192 | -1.27348 |
| H | 3.85320  | -4.06715 | -0.15121 |
| H | 2.16601  | -4.24003 | -1.95831 |
| C | 2.10588  | 1.24642  | 0.42554  |

HL-NH2 B (III)

$\Delta G = -1222.878491$

|   |          |          |          |
|---|----------|----------|----------|
| C | -1.61106 | 0.00120  | 1.57232  |
| C | -0.77955 | 0.00246  | 3.84198  |
| C | 0.53761  | 0.00187  | 3.37200  |
| H | -0.97262 | 0.00317  | 4.90739  |
| C | 0.72863  | 0.00103  | 2.01080  |
| H | 1.38395  | 0.00207  | 4.04439  |
| C | 2.05665  | 0.00025  | 1.28462  |
| H | 2.88611  | 0.00039  | 1.98440  |
| C | 3.03928  | -2.21306 | 0.48117  |
| C | 2.94507  | -3.29430 | -0.42158 |
| H | 3.82634  | -2.15660 | 1.21937  |
| C | 0.99345  | -2.27736 | -1.42771 |
| C | 1.94632  | -3.32714 | -1.35539 |

|   |          |          |          |
|---|----------|----------|----------|
| H | 3.66958  | -4.09807 | -0.37834 |
| H | 1.86244  | -4.14126 | -2.06269 |
| C | 2.10036  | 1.22952  | 0.39470  |
| C | 2.94693  | 3.29255  | -0.42492 |
| C | 0.99472  | 2.27569  | -1.43002 |
| C | 1.94818  | 3.32502  | -1.35874 |
| H | 3.67188  | 4.09596  | -0.38248 |
| H | 1.86474  | 4.13849  | -2.06684 |
| C | 2.09966  | -1.22997 | 0.39598  |
| C | 3.04055  | 2.21215  | 0.47889  |
| H | 3.82759  | 2.15598  | 1.21713  |
| N | -0.31835 | 0.00077  | 1.14801  |
| N | 1.07597  | -1.25433 | -0.52552 |
| N | 1.07666  | 1.25353  | -0.52679 |
| C | -1.84102 | 0.00212  | 2.95365  |
| H | -2.85230 | 0.00260  | 3.32908  |
| C | -2.66182 | 0.00065  | 0.55721  |
| C | -4.02898 | 0.00068  | 0.89454  |
| C | -2.32335 | 0.00005  | -0.80639 |
| C | -5.00852 | 0.00023  | -0.08477 |
| H | -4.33100 | 0.00102  | 1.93304  |
| C | -3.30211 | -0.00037 | -1.79544 |
| C | -4.64320 | -0.00026 | -1.43373 |
| H | -6.05327 | 0.00027  | 0.19869  |
| H | -3.00111 | -0.00079 | -2.83582 |
| H | -5.40379 | -0.00059 | -2.20508 |
| O | -1.01573 | -0.00017 | -1.22981 |
| N | 0.04087  | 2.29017  | -2.36819 |
| H | -0.62392 | 1.53854  | -2.45738 |
| N | 0.03954  | -2.29224 | -2.36582 |
| H | -0.62475 | -1.54027 | -2.45581 |
| H | 0.01106  | 3.04751  | -3.03201 |
| H | 0.00930  | -3.05020 | -3.02891 |
| B | 0.10120  | -0.00005 | -0.36330 |

HL-NH2 Ca (II)

$\Delta G = -1875.874369$

|   |          |          |         |
|---|----------|----------|---------|
| C | -1.96864 | 0.04572  | 1.30570 |
| C | -1.11269 | 0.08773  | 3.56529 |
| C | 0.17525  | -0.04025 | 3.05193 |
| H | -1.27167 | 0.16475  | 4.63470 |
| C | 0.33790  | -0.11406 | 1.67096 |
| H | 1.03644  | -0.06006 | 3.70735 |
| C | 1.76330  | -0.12714 | 1.10914 |
| H | 2.41150  | -0.07151 | 1.98192 |
| C | 3.37571  | -2.01540 | 0.79890 |
| C | 3.79219  | -3.17991 | 0.14810 |

|    |          |          |          |
|----|----------|----------|----------|
| H  | 3.96323  | -1.58821 | 1.60035  |
| C  | 1.80708  | -3.06422 | -1.18964 |
| C  | 3.00750  | -3.71745 | -0.84965 |
| H  | 4.71608  | -3.66730 | 0.43714  |
| H  | 3.28643  | -4.63207 | -1.35780 |
| C  | 2.06711  | 1.14670  | 0.31134  |
| C  | 3.33988  | 3.14288  | -0.03734 |
| C  | 1.38784  | 2.64621  | -1.33493 |
| C  | 2.46315  | 3.50754  | -1.04024 |
| H  | 4.16976  | 3.79206  | 0.21753  |
| H  | 2.57360  | 4.44314  | -1.57417 |
| C  | 2.19066  | -1.41238 | 0.39629  |
| C  | 3.13311  | 1.95675  | 0.67750  |
| H  | 3.78011  | 1.68101  | 1.49956  |
| N  | -0.71029 | -0.10799 | 0.82777  |
| N  | 1.42518  | -1.91218 | -0.59820 |
| N  | 1.24689  | 1.46264  | -0.70711 |
| C  | -2.18442 | 0.15704  | 2.69208  |
| H  | -3.18308 | 0.32246  | 3.07131  |
| C  | -3.12430 | 0.13312  | 0.37701  |
| C  | -4.36552 | -0.37720 | 0.80808  |
| C  | -3.05425 | 0.79176  | -0.90046 |
| C  | -5.52995 | -0.23995 | 0.06648  |
| H  | -4.40952 | -0.91456 | 1.74893  |
| C  | -4.27233 | 0.95416  | -1.61419 |
| C  | -5.47594 | 0.45079  | -1.15098 |
| H  | -6.46110 | -0.66165 | 0.42579  |
| H  | -4.22129 | 1.47863  | -2.56266 |
| H  | -6.37665 | 0.58402  | -1.74188 |
| O  | -1.93209 | 1.23096  | -1.42149 |
| N  | 0.44203  | 2.95024  | -2.28653 |
| H  | -0.49314 | 2.58459  | -2.11466 |
| N  | 1.00621  | -3.57651 | -2.18661 |
| H  | 0.01388  | -3.40590 | -2.11905 |
| H  | 0.45270  | 3.89442  | -2.64351 |
| H  | 1.21971  | -4.51631 | -2.48711 |
| Ca | -0.28866 | -0.27771 | -1.58748 |

HL-NH2 Co (II)

$\Delta G = -2580.921115$

|   |          |          |         |
|---|----------|----------|---------|
| C | 1.87922  | -0.36894 | 1.43399 |
| C | 1.13051  | -0.44466 | 3.73253 |
| C | -0.18910 | -0.35612 | 3.29230 |
| H | 1.35071  | -0.49152 | 4.79229 |
| C | -0.42508 | -0.28312 | 1.92783 |
| H | -1.01472 | -0.32289 | 3.99065 |
| C | -1.83611 | -0.09001 | 1.38190 |

|    |          |          |          |    |          |          |          |
|----|----------|----------|----------|----|----------|----------|----------|
| H  | -2.51812 | -0.11458 | 2.22922  | C  | -0.47968 | -0.00030 | 1.93758  |
| C  | -2.89250 | 2.21084  | 1.17712  | H  | -1.07497 | -0.00068 | 3.98686  |
| C  | -2.97602 | 3.43899  | 0.50567  | C  | -1.91071 | -0.00013 | 1.41940  |
| H  | -3.51500 | 1.99512  | 2.03490  | H  | -2.57941 | -0.00022 | 2.27573  |
| C  | -1.23515 | 2.70507  | -0.98070 | C  | -3.16573 | 2.14887  | 0.86790  |
| C  | -2.15202 | 3.69641  | -0.56894 | C  | -3.30804 | 3.24914  | 0.00483  |
| H  | -3.67995 | 4.19255  | 0.83912  | H  | -3.80602 | 2.01545  | 1.72844  |
| H  | -2.18627 | 4.64425  | -1.09115 | C  | -1.44527 | 2.44898  | -1.29993 |
| C  | -2.24488 | -1.19954 | 0.43058  | C  | -2.46067 | 3.40418  | -1.06578 |
| C  | -3.69258 | -2.96863 | -0.25768 | H  | -4.08047 | 3.98552  | 0.18983  |
| C  | -1.79281 | -2.30758 | -1.57875 | H  | -2.54117 | 4.25331  | -1.73186 |
| C  | -2.91951 | -3.13372 | -1.38479 | C  | -2.17654 | -1.23777 | 0.58557  |
| H  | -4.55613 | -3.60252 | -0.09513 | C  | -3.30845 | -3.24880 | 0.00384  |
| H  | -3.15237 | -3.89137 | -2.12192 | C  | -1.44544 | -2.44858 | -1.30055 |
| C  | -1.98699 | 1.27641  | 0.70928  | C  | -2.46101 | -3.40370 | -1.06673 |
| C  | -3.35383 | -1.98388 | 0.67893  | H  | -4.08101 | -3.98512 | 0.18859  |
| H  | -3.94094 | -1.83207 | 1.57408  | H  | -2.54155 | -4.25266 | -1.73303 |
| N  | 0.58428  | -0.32928 | 1.03365  | C  | -2.17638 | 1.23779  | 0.58594  |
| N  | -1.19373 | 1.50842  | -0.35830 | C  | -3.16604 | -2.14879 | 0.86722  |
| N  | -1.47646 | -1.34904 | -0.67606 | H  | -3.80635 | -2.01552 | 1.72777  |
| C  | 2.16168  | -0.42945 | 2.80941  | N  | 0.54152  | -0.00017 | 1.03666  |
| H  | 3.18781  | -0.43127 | 3.14706  | N  | -1.35069 | 1.37416  | -0.47729 |
| C  | 2.95791  | -0.29041 | 0.43075  | N  | -1.35082 | -1.37396 | -0.47766 |
| C  | 4.23225  | -0.80798 | 0.73798  | C  | 2.10075  | -0.00063 | 2.82783  |
| C  | 2.77711  | 0.37148  | -0.82169 | H  | 3.11625  | -0.00079 | 3.18655  |
| C  | 5.31380  | -0.66176 | -0.11571 | C  | 2.98364  | -0.00010 | 0.49633  |
| H  | 4.37035  | -1.35211 | 1.66450  | C  | 4.31642  | -0.00009 | 0.95871  |
| C  | 3.89865  | 0.53706  | -1.66301 | C  | 2.80575  | 0.00008  | -0.91327 |
| C  | 5.14194  | 0.03356  | -1.31903 | C  | 5.39448  | 0.00005  | 0.08892  |
| H  | 6.27654  | -1.08255 | 0.14739  | H  | 4.53333  | -0.00018 | 2.01572  |
| H  | 3.74932  | 1.06222  | -2.59949 | C  | 3.90155  | 0.00021  | -1.79321 |
| H  | 5.97956  | 0.16786  | -1.99494 | C  | 5.18987  | 0.00019  | -1.29624 |
| O  | 1.60974  | 0.85694  | -1.23157 | H  | 6.39968  | 0.00005  | 0.49119  |
| N  | -1.03382 | -2.43389 | -2.70815 | H  | 3.69839  | 0.00034  | -2.85656 |
| H  | -0.07927 | -2.10872 | -2.70673 | H  | 6.03420  | 0.00030  | -1.97473 |
| N  | -0.38795 | 2.89698  | -2.03580 | O  | 1.59256  | 0.00012  | -1.45128 |
| H  | 0.46411  | 2.34342  | -2.03888 | N  | -0.59311 | -2.56866 | -2.34696 |
| H  | -1.18110 | -3.26137 | -3.26650 | H  | 0.28336  | -2.06647 | -2.35892 |
| H  | -0.28399 | 3.84304  | -2.37053 | N  | -0.59309 | 2.56914  | -2.34646 |
| Co | 0.06024  | -0.08628 | -0.83025 | H  | 0.28332  | 2.06686  | -2.35864 |
|    |          |          |          | H  | -0.59836 | -3.43347 | -2.86588 |
|    |          |          |          | H  | -0.59830 | 3.43406  | -2.86520 |
|    |          |          |          | Co | -0.01824 | 0.00007  | -0.75284 |

HL-NH2 Co (III)

$\Delta G = -2580.701621$

|   |          |          |         |
|---|----------|----------|---------|
| C | 1.85148  | -0.00029 | 1.44132 |
| C | 1.07509  | -0.00077 | 3.74702 |
| C | -0.24193 | -0.00058 | 3.29764 |
| H | 1.29543  | -0.00102 | 4.80695 |

HL-NH2 Cr (II)

$\Delta G = -2242.635701$

|   |          |          |         |
|---|----------|----------|---------|
| C | -1.86986 | -0.44346 | 1.39430 |
|---|----------|----------|---------|

|    |          |          |          |                           |          |          |          |
|----|----------|----------|----------|---------------------------|----------|----------|----------|
| C  | -1.09025 | -0.57400 | 3.68869  | HL-NH2 Cr (III)           |          |          |          |
| C  | 0.22002  | -0.43424 | 3.23257  | $\Delta G = -2242.495839$ |          |          |          |
| H  | -1.29929 | -0.66456 | 4.74744  | C                         | -1.86913 | 0.76462  | 1.26688  |
| C  | 0.44202  | -0.29206 | 1.87367  | C                         | -1.09389 | 1.33131  | 3.49181  |
| H  | 1.05470  | -0.40416 | 3.92105  | C                         | 0.21097  | 1.01648  | 3.11449  |
| C  | 1.83901  | 0.00281  | 1.34177  | H                         | -1.30570 | 1.65725  | 4.50264  |
| H  | 2.50503  | 0.04161  | 2.20125  | C                         | 0.43554  | 0.59068  | 1.82021  |
| C  | 3.54110  | -1.75316 | 0.72753  | H                         | 1.03313  | 1.08355  | 3.81371  |
| C  | 4.01350  | -2.71784 | -0.17168 | C                         | 1.82193  | 0.16255  | 1.36182  |
| H  | 4.07501  | -1.52779 | 1.64048  | H                         | 2.47927  | 0.23579  | 2.22404  |
| C  | 2.11030  | -2.27466 | -1.57480 | C                         | 2.66131  | -2.21933 | 1.47994  |
| C  | 3.30486  | -2.98109 | -1.32173 | C                         | 2.60755  | -3.54349 | 1.00788  |
| H  | 4.92950  | -3.25769 | 0.03705  | H                         | 3.34340  | -1.93065 | 2.26719  |
| H  | 3.63986  | -3.72525 | -2.03295 | C                         | 0.83656  | -2.91088 | -0.49946 |
| C  | 1.87941  | 1.38168  | 0.68431  | C                         | 1.70701  | -3.89121 | 0.03381  |
| C  | 2.71769  | 3.61038  | 0.49365  | H                         | 3.26633  | -4.29395 | 1.42748  |
| C  | 0.94730  | 2.81038  | -0.92531 | H                         | 1.62616  | -4.90861 | -0.32570 |
| C  | 1.81759  | 3.84477  | -0.52413 | C                         | 2.39329  | 1.07443  | 0.28603  |
| H  | 3.38987  | 4.39813  | 0.81291  | C                         | 4.03006  | 2.62038  | -0.50155 |
| H  | 1.75760  | 4.80904  | -1.01277 | C                         | 2.20673  | 1.89418  | -1.90457 |
| C  | 2.37582  | -1.08061 | 0.41713  | C                         | 3.37991  | 2.66584  | -1.70580 |
| C  | 2.74901  | 2.36023  | 1.12689  | H                         | 4.92515  | 3.20982  | -0.34438 |
| H  | 3.42976  | 2.16057  | 1.94336  | H                         | 3.74146  | 3.28223  | -2.51854 |
| N  | -0.57139 | -0.34558 | 0.96542  | C                         | 1.82234  | -1.29121 | 0.91579  |
| N  | 1.66631  | -1.32509 | -0.71544 | C                         | 3.53043  | 1.80417  | 0.52843  |
| N  | 1.01653  | 1.58858  | -0.34074 | H                         | 4.02440  | 1.74506  | 1.48798  |
| C  | -2.12717 | -0.54690 | 2.76857  | N                         | -0.57501 | 0.50243  | 0.92060  |
| H  | -3.14911 | -0.58462 | 3.11667  | N                         | 0.94443  | -1.61932 | -0.07631 |
| C  | -2.97914 | -0.41037 | 0.41666  | N                         | 1.72557  | 1.10529  | -0.90444 |
| C  | -4.22406 | -0.97550 | 0.76734  | C                         | -2.12391 | 1.18696  | 2.58257  |
| C  | -2.87203 | 0.22182  | -0.85873 | H                         | -3.14042 | 1.36625  | 2.89683  |
| C  | -5.33627 | -0.89444 | -0.05519 | C                         | -2.97505 | 0.54918  | 0.31672  |
| H  | -4.31501 | -1.50875 | 1.70542  | C                         | -4.23190 | 1.14511  | 0.55397  |
| C  | -4.02069 | 0.31765  | -1.67175 | C                         | -2.85609 | -0.31230 | -0.80515 |
| C  | -5.23305 | -0.22502 | -1.28045 | C                         | -5.33280 | 0.87080  | -0.23919 |
| H  | -6.27097 | -1.34975 | 0.24916  | H                         | -4.34436 | 1.85086  | 1.36607  |
| H  | -3.91728 | 0.82299  | -2.62534 | C                         | -3.98381 | -0.60929 | -1.58511 |
| H  | -6.09542 | -0.14258 | -1.93306 | C                         | -5.20964 | -0.02830 | -1.30410 |
| O  | -1.73147 | 0.73399  | -1.32177 | H                         | -6.28031 | 1.35248  | -0.03267 |
| N  | 0.03826  | 2.98368  | -1.92772 | H                         | -3.86095 | -1.28920 | -2.41924 |
| H  | -0.77639 | 2.37502  | -1.93109 | H                         | -6.06777 | -0.26085 | -1.92410 |
| N  | 1.41420  | -2.51605 | -2.72675 | O                         | -1.68524 | -0.86328 | -1.16195 |
| H  | 0.42902  | -2.30872 | -2.77935 | N                         | 1.59610  | 1.94897  | -3.10818 |
| H  | -0.12390 | 3.92880  | -2.24040 | H                         | 0.71902  | 1.51019  | -3.32670 |
| H  | 1.68297  | -3.33185 | -3.25609 | N                         | -0.07987 | -3.22775 | -1.43828 |
| Cr | -0.05300 | -0.08247 | -0.91953 | H                         | -0.88372 | -2.62512 | -1.58279 |
|    |          |          |          | H                         | 1.94890  | 2.58941  | -3.80121 |
|    |          |          |          | H                         | -0.19574 | -4.20094 | -1.67524 |



Cr -0.02622 -0.06911 -0.90775

H -0.29854 -2.09446 -2.40609

H 0.98683 3.76719 -2.73713

H 0.48758 -3.52319 -2.90416

HL-NH2 Cu(II)

Cu -0.05179 0.21047 -0.81213

$\Delta G = -2838.629298$

C -1.90166 0.02013 1.49066

HL-NH2 Fe(II)

$\Delta G = -2461.86347$

C -1.13010 -0.30803 3.75718

C -1.90037 -0.20421 1.44799

C 0.19046 -0.24288 3.31188

C -1.13287 -0.10932 3.74351

H -1.34086 -0.47298 4.80707

C 0.18967 -0.09536 3.29397

C 0.41512 -0.04660 1.95712

H -1.34752 -0.06192 4.80458

H 1.02094 -0.36401 3.99461

C 0.42035 -0.13819 1.93040

C 1.82956 -0.06721 1.37179

H 1.01672 -0.02932 3.98905

H 2.51847 -0.12927 2.21132

C 1.83853 -0.03190 1.35927

C 3.00018 -2.26725 0.86931

H 2.51997 -0.02269 2.20863

C 3.14284 -3.39377 0.04547

C 3.31119 -2.01706 0.78415

H 3.60330 -2.14187 1.75836

C 3.61185 -3.08225 -0.07548

C 1.39127 -2.54612 -1.36104

H 3.92140 -1.81198 1.65327

C 2.34261 -3.54668 -1.06696

C 1.71204 -2.48652 -1.41793

H 3.87484 -4.15423 0.29135

C 2.81911 -3.32299 -1.17607

H 2.42280 -4.41827 -1.70420

H 4.46459 -3.71973 0.12582

C 2.17766 1.20076 0.60493

H 3.02863 -4.14216 -1.85234

C 3.53425 3.13030 0.22098

C 2.04989 1.29074 0.60303

C 1.67659 2.60498 -1.20943

C 3.12451 3.39710 0.27051

C 2.76074 3.44283 -0.87374

C 1.33235 2.66761 -1.15169

H 4.36561 3.76898 0.49455

C 2.29651 3.63818 -0.80359

H 2.96037 4.31964 -1.47605

H 3.86482 4.13511 0.55645

C 2.05819 -1.31912 0.51183

H 2.36407 4.55866 -1.36996

C 3.24383 1.99099 0.98465

C 2.21507 -1.22917 0.49479

H 3.83733 1.72931 1.84961

C 2.99824 2.20931 1.00855

N -0.61175 0.11288 1.10270

H 3.62346 2.01960 1.87078

N 1.29244 -1.44721 -0.59053

N -0.60292 -0.22605 1.04811

N 1.41202 1.50130 -0.47443

N 1.43082 -1.45654 -0.58944

C -2.17367 -0.19815 2.85310

N 1.25904 1.50476 -0.47319

H -3.19341 -0.30608 3.19288

C -2.16852 -0.14353 2.82938

C -2.97626 0.11386 0.47981

H -3.19075 -0.09073 3.17379

C -4.26750 0.50225 0.89273

C -2.98195 -0.19835 0.44652

C -2.78265 -0.22305 -0.89626

C -4.27722 -0.60883 0.83115

C -5.34777 0.53260 0.02647

C -2.80241 0.26743 -0.89020

H -4.41994 0.80588 1.92092

C -5.35966 -0.53631 -0.02577

C -3.90221 -0.21438 -1.75511

H -4.43052 -1.01678 1.82225

C -5.15929 0.15495 -1.30746

C -3.91995 0.36609 -1.73687

H -6.32148 0.84751 0.38099

C -5.17810 -0.02741 -1.31606

H -3.73950 -0.49499 -2.78921

H -6.33535 -0.87224 0.30193

H -5.99333 0.16180 -2.00070

H -3.75783 0.74699 -2.73803

O -1.61170 -0.57308 -1.43126

H -6.01929 0.04803 -1.99557

N 0.90204 2.86224 -2.29993

O -1.61279 0.62618 -1.39697

H -0.01415 2.44530 -2.37037

N 0.56316 -2.62745 -2.44630

|    |          |          |          |   |          |          |          |
|----|----------|----------|----------|---|----------|----------|----------|
| N  | 0.46270  | 2.83770  | -2.18735 | H | -3.71435 | -0.08602 | -2.85984 |
| H  | -0.39668 | 2.29796  | -2.18100 | H | -6.04971 | -0.17661 | -1.98547 |
| N  | 0.91417  | -2.66520 | -2.51126 | O | -1.61695 | 0.01848  | -1.47921 |
| H  | -0.00157 | -2.24266 | -2.53888 | N | 0.75859  | 2.68076  | -2.40768 |
| H  | 0.40973  | 3.74582  | -2.62062 | H | -0.10432 | 2.17410  | -2.53809 |
| H  | 1.02227  | -3.50471 | -3.05782 | N | 0.55879  | -2.57642 | -2.40540 |
| Fe | -0.04962 | -0.10153 | -0.79546 | H | -0.31697 | -2.07394 | -2.42853 |

HL-NH2 Fe(III)

$\Delta G = -2461.659596$

|   |          |          |          |
|---|----------|----------|----------|
| C | -1.88408 | 0.02877  | 1.44968  |
| C | -1.10223 | 0.06163  | 3.75009  |
| C | 0.21406  | 0.03564  | 3.29649  |
| H | -1.31783 | 0.08093  | 4.81088  |
| C | 0.44116  | 0.02409  | 1.93439  |
| H | 1.04897  | 0.02788  | 3.98349  |
| C | 1.86149  | 0.00066  | 1.38899  |
| H | 2.54162  | -0.02439 | 2.23637  |
| C | 3.11503  | -2.13794 | 0.81472  |
| C | 3.27582  | -3.23241 | -0.05442 |
| H | 3.76179  | -1.99606 | 1.66916  |
| C | 1.40609  | -2.45453 | -1.35792 |
| C | 2.43614  | -3.39548 | -1.12898 |
| H | 4.06200  | -3.95486 | 0.12764  |
| H | 2.53640  | -4.23632 | -1.80262 |
| C | 2.15962  | 1.25426  | 0.58052  |
| C | 3.38290  | 3.23293  | 0.06487  |
| C | 1.54662  | 2.51376  | -1.32146 |
| C | 2.58514  | 3.43165  | -1.03428 |
| H | 4.17472  | 3.93705  | 0.28957  |
| H | 2.72743  | 4.28148  | -1.68882 |
| C | 2.10946  | -1.24197 | 0.54608  |
| C | 3.17502  | 2.12049  | 0.90072  |
| H | 3.79291  | 1.94373  | 1.76980  |
| N | -0.57981 | 0.03264  | 1.03856  |
| N | 1.28221  | -1.39233 | -0.52222 |
| N | 1.36246  | 1.44432  | -0.50490 |
| C | -2.13376 | 0.05648  | 2.83535  |
| H | -3.14765 | 0.07229  | 3.19896  |
| C | -3.00622 | -0.01748 | 0.49233  |
| C | -4.33945 | -0.07484 | 0.94994  |
| C | -2.82411 | -0.02617 | -0.91756 |
| C | -5.41622 | -0.13014 | 0.08005  |
| H | -4.55552 | -0.08358 | 2.00724  |
| C | -3.91970 | -0.08289 | -1.79685 |
| C | -5.20864 | -0.13283 | -1.30430 |
| H | -6.42091 | -0.17420 | 0.48134  |

|    |          |          |          |
|----|----------|----------|----------|
| H  | -3.71435 | -0.08602 | -2.85984 |
| H  | -6.04971 | -0.17661 | -1.98547 |
| O  | -1.61695 | 0.01848  | -1.47921 |
| N  | 0.75859  | 2.68076  | -2.40768 |
| H  | -0.10432 | 2.17410  | -2.53809 |
| N  | 0.55879  | -2.57642 | -2.40540 |
| H  | -0.31697 | -2.07394 | -2.42853 |
| H  | 0.84651  | 3.53275  | -2.93951 |
| H  | 0.58932  | -3.42265 | -2.95282 |
| Fe | -0.00228 | 0.05633  | -0.77489 |

HL-NH2 K(I)

$\Delta G = -1798.254357$

|   |          |          |          |
|---|----------|----------|----------|
| C | -2.05662 | 0.24060  | 1.35134  |
| C | -1.15934 | 1.28215  | 3.33395  |
| C | 0.11591  | 1.03174  | 2.84263  |
| H | -1.29508 | 1.77641  | 4.28963  |
| C | 0.24545  | 0.39893  | 1.60267  |
| H | 0.99682  | 1.31234  | 3.40769  |
| C | 1.65681  | 0.09034  | 1.09247  |
| H | 2.26751  | -0.03013 | 1.99089  |
| C | 1.87809  | -2.41835 | 1.11407  |
| C | 1.96111  | -3.63717 | 0.43815  |
| H | 1.91517  | -2.37607 | 2.19536  |
| C | 1.81294  | -2.43246 | -1.62437 |
| C | 1.93097  | -3.65903 | -0.94502 |
| H | 2.06185  | -4.56355 | 0.99258  |
| H | 2.00646  | -4.58804 | -1.49703 |
| C | 2.29446  | 1.24728  | 0.32325  |
| C | 4.23404  | 2.51791  | -0.28156 |
| C | 2.04692  | 3.06774  | -1.08202 |
| C | 3.42664  | 3.34182  | -1.04568 |
| H | 5.30016  | 2.70703  | -0.22355 |
| H | 3.83423  | 4.18249  | -1.59399 |
| C | 1.74957  | -1.25139 | 0.36310  |
| C | 3.66863  | 1.45469  | 0.42574  |
| H | 4.27892  | 0.80705  | 1.04260  |
| N | -0.81147 | 0.02668  | 0.86892  |
| N | 1.71285  | -1.25925 | -0.97764 |
| N | 1.50223  | 2.03453  | -0.41932 |
| C | -2.25738 | 0.87770  | 2.58486  |
| H | -3.26518 | 1.05033  | 2.94105  |
| C | -3.23029 | -0.26399 | 0.58689  |
| C | -4.09596 | -1.16196 | 1.22495  |
| C | -3.51063 | 0.18957  | -0.75395 |
| C | -5.22603 | -1.68490 | 0.59667  |
| H | -3.86306 | -1.47356 | 2.23969  |

|   |          |          |          |
|---|----------|----------|----------|
| C | -4.67814 | -0.37183 | -1.36455 |
| C | -5.50387 | -1.27694 | -0.71400 |
| H | -5.86664 | -2.39206 | 1.11085  |
| H | -4.91093 | -0.05030 | -2.37586 |
| H | -6.37693 | -1.66862 | -1.22899 |
| O | -2.78198 | 1.06233  | -1.36649 |
| N | 1.18572  | 3.82778  | -1.85234 |
| H | 0.21814  | 3.81266  | -1.56120 |
| N | 1.74309  | -2.38400 | -3.00461 |
| H | 2.01383  | -1.50464 | -3.42197 |
| H | 1.50964  | 4.74516  | -2.12252 |
| H | 2.08803  | -3.19008 | -3.50512 |
| K | -0.37429 | 0.48894  | -2.00265 |

HL-NH2 Li (I)

$\Delta G = -1205.868101$

|   |          |          |          |
|---|----------|----------|----------|
| C | 1.87933  | -0.03314 | 1.36257  |
| C | 1.09064  | -0.37765 | 3.62301  |
| C | -0.22230 | -0.25463 | 3.16631  |
| H | 1.28737  | -0.56607 | 4.67259  |
| C | -0.41910 | -0.04381 | 1.80429  |
| H | -1.06302 | -0.34173 | 3.84317  |
| C | -1.83633 | -0.00622 | 1.21935  |
| H | -2.52859 | -0.03677 | 2.06018  |
| C | -3.13401 | 2.13467  | 0.91211  |
| C | -3.39484 | 3.30284  | 0.18817  |
| H | -3.68953 | 1.89883  | 1.81034  |
| C | -1.67555 | 2.66187  | -1.35308 |
| C | -2.66902 | 3.57893  | -0.95364 |
| H | -4.16264 | 3.99149  | 0.52236  |
| H | -2.84779 | 4.47538  | -1.53464 |
| C | -2.09937 | -1.25991 | 0.37951  |
| C | -3.26786 | -3.29018 | -0.09473 |
| C | -1.38570 | -2.57810 | -1.39676 |
| C | -2.40055 | -3.52470 | -1.14636 |
| H | -4.05499 | -4.00356 | 0.12287  |
| H | -2.48496 | -4.41351 | -1.75962 |
| C | -2.13916 | 1.28004  | 0.45005  |
| C | -3.12216 | -2.14538 | 0.69969  |
| H | -3.77845 | -1.95876 | 1.53975  |
| N | 0.60102  | 0.08213  | 0.94716  |
| N | -1.42481 | 1.53822  | -0.66173 |
| N | -1.27287 | -1.46652 | -0.65456 |
| C | 2.14273  | -0.28690 | 2.72539  |
| H | 3.15725  | -0.43261 | 3.07002  |
| C | 2.97440  | 0.09751  | 0.37303  |
| C | 4.23059  | 0.55110  | 0.82448  |

|    |          |          |          |
|----|----------|----------|----------|
| C  | 2.81739  | -0.24770 | -1.02597 |
| C  | 5.33946  | 0.65788  | -0.00289 |
| H  | 4.33254  | 0.85409  | 1.86089  |
| C  | 3.99219  | -0.15550 | -1.83524 |
| C  | 5.20922  | 0.28492  | -1.34847 |
| H  | 6.28130  | 1.02775  | 0.38509  |
| H  | 3.88642  | -0.43689 | -2.87859 |
| H  | 6.06343  | 0.34953  | -2.01606 |
| O  | 1.70264  | -0.63822 | -1.56404 |
| N  | -0.47969 | -2.71289 | -2.42324 |
| H  | 0.38005  | -2.17848 | -2.31582 |
| N  | -0.95285 | 2.86594  | -2.50848 |
| H  | -0.07984 | 2.36513  | -2.58894 |
| H  | -0.36623 | -3.63361 | -2.82014 |
| H  | -0.92072 | 3.80804  | -2.86875 |
| Li | 0.07061  | 0.03797  | -0.97042 |

HL-NH2 Mg (II)

$\Delta G = -1398.337895$

|   |          |          |          |
|---|----------|----------|----------|
| C | -1.92918 | 0.13708  | 1.37531  |
| C | -1.13157 | 0.43705  | 3.63900  |
| C | 0.17793  | 0.26223  | 3.19066  |
| H | -1.32659 | 0.63144  | 4.68722  |
| C | 0.37706  | 0.04516  | 1.83452  |
| H | 1.01720  | 0.31547  | 3.87163  |
| C | 1.79334  | -0.05635 | 1.25854  |
| H | 2.47094  | -0.03819 | 2.10940  |
| C | 3.03878  | -2.22086 | 1.04374  |
| C | 3.31343  | -3.41476 | 0.36400  |
| H | 3.56463  | -1.96395 | 1.95302  |
| C | 1.65894  | -2.80414 | -1.26895 |
| C | 2.63086  | -3.71164 | -0.79144 |
| H | 4.05809  | -4.10196 | 0.74809  |
| H | 2.81802  | -4.62644 | -1.33919 |
| C | 2.13453  | 1.17685  | 0.41626  |
| C | 3.43155  | 3.13123  | -0.03563 |
| C | 1.52023  | 2.55886  | -1.36854 |
| C | 2.59682  | 3.42777  | -1.09190 |
| H | 4.26045  | 3.78946  | 0.19741  |
| H | 2.74292  | 4.31493  | -1.69474 |
| C | 2.07867  | -1.37072 | 0.52811  |
| C | 3.19609  | 1.99580  | 0.75373  |
| H | 3.82132  | 1.76723  | 1.60601  |
| N | -0.64846 | -0.03242 | 0.96842  |
| N | 1.39215  | -1.65157 | -0.61333 |
| N | 1.33648  | 1.43572  | -0.64417 |
| C | -2.18114 | 0.39172  | 2.73676  |

|    |          |          |          |   |          |          |          |
|----|----------|----------|----------|---|----------|----------|----------|
| H  | -3.18959 | 0.57793  | 3.07685  | N | -1.49200 | 1.47766  | -0.58107 |
| C  | -3.03344 | 0.07244  | 0.38933  | N | -1.22457 | -1.53503 | -0.49051 |
| C  | -4.31245 | -0.31271 | 0.84388  | C | 2.17758  | 0.14018  | 2.81059  |
| C  | -2.87789 | 0.42133  | -0.99606 | H | 3.20014  | 0.09989  | 3.15640  |
| C  | -5.42512 | -0.33438 | 0.01771  | C | 3.00486  | 0.24397  | 0.44281  |
| H  | -4.42978 | -0.62630 | 1.87440  | C | 4.26928  | 0.72940  | 0.83454  |
| C  | -4.03997 | 0.42290  | -1.80699 | C | 2.86089  | -0.27760 | -0.88044 |
| C  | -5.28168 | 0.05332  | -1.32024 | C | 5.37563  | 0.67753  | 0.00140  |
| H  | -6.38646 | -0.65053 | 0.40438  | H | 4.38077  | 1.17368  | 1.81606  |
| H  | -3.91505 | 0.71189  | -2.84502 | C | 4.00894  | -0.35434 | -1.69857 |
| H  | -6.14073 | 0.05374  | -1.98326 | C | 5.24135  | 0.11162  | -1.27154 |
| O  | -1.72450 | 0.75260  | -1.54565 | H | 6.32773  | 1.07175  | 0.33518  |
| N  | 0.64302  | 2.79692  | -2.38998 | H | 3.88642  | -0.77647 | -2.68965 |
| H  | -0.27884 | 2.37702  | -2.32771 | H | 6.09763  | 0.04975  | -1.93453 |
| N  | 1.01366  | -3.07910 | -2.44134 | O | 1.70530  | -0.69709 | -1.38933 |
| H  | 0.13809  | -2.63847 | -2.67475 | N | -0.43724 | -2.83583 | -2.24043 |
| H  | 0.66601  | 3.70844  | -2.82116 | H | 0.41044  | -2.27785 | -2.23122 |
| H  | 1.11380  | -4.01173 | -2.81167 | N | -1.10458 | 2.84051  | -2.46061 |
| Mg | -0.06379 | -0.11267 | -1.05433 | H | -0.11578 | 2.63975  | -2.47027 |

HL-NH2 Mn (II)

$\Delta G = -2349.155382$

|   |          |          |          |
|---|----------|----------|----------|
| C | 1.90747  | 0.22124  | 1.43480  |
| C | 1.13943  | 0.06710  | 3.72428  |
| C | -0.17591 | 0.03409  | 3.26682  |
| H | 1.35157  | 0.00314  | 4.78474  |
| C | -0.40396 | 0.10509  | 1.90036  |
| H | -1.00678 | -0.06281 | 3.95298  |
| C | -1.82160 | -0.02371 | 1.34564  |
| H | -2.48984 | -0.05704 | 2.20370  |
| C | -3.39422 | 1.87303  | 0.83847  |
| C | -3.78076 | 2.94587  | 0.02877  |
| H | -3.97210 | 1.58943  | 1.70747  |
| C | -1.85319 | 2.53375  | -1.35198 |
| C | -3.01187 | 3.28074  | -1.06453 |
| H | -4.67179 | 3.51599  | 0.26295  |
| H | -3.27537 | 4.11359  | -1.70406 |
| C | -2.00976 | -1.34458 | 0.58992  |
| C | -3.03445 | -3.47621 | 0.26806  |
| C | -1.28437 | -2.69340 | -1.17717 |
| C | -2.21530 | -3.69229 | -0.81990 |
| H | -3.75050 | -4.23486 | 0.56195  |
| H | -2.26551 | -4.61125 | -1.39020 |
| C | -2.25073 | 1.17068  | 0.50428  |
| C | -2.93122 | -2.28750 | 1.00649  |
| H | -3.54966 | -2.11148 | 1.87620  |
| N | 0.61360  | 0.23188  | 1.01860  |

|    |         |         |          |
|----|---------|---------|----------|
| Mn | 0.08273 | 0.17345 | -0.90796 |
|----|---------|---------|----------|

HL-NH2 Na (I)

$\Delta G = -1360.620042$

|   |          |          |          |
|---|----------|----------|----------|
| C | -1.95242 | 0.10915  | 1.33816  |
| C | -1.09271 | 0.40412  | 3.57500  |
| C | 0.19462  | 0.24073  | 3.06920  |
| H | -1.24700 | 0.58921  | 4.63233  |
| C | 0.34799  | 0.02000  | 1.69863  |
| H | 1.05950  | 0.29777  | 3.71869  |
| C | 1.76883  | -0.07096 | 1.12527  |
| H | 2.43117  | -0.06299 | 1.99075  |
| C | 3.00197  | -2.25122 | 0.98725  |
| C | 3.30868  | -3.44600 | 0.33022  |
| H | 3.46591  | -2.00392 | 1.93312  |
| C | 1.78929  | -2.80128 | -1.40442 |
| C | 2.70525  | -3.73365 | -0.87735 |
| H | 4.01598  | -4.14318 | 0.76516  |
| H | 2.92119  | -4.64868 | -1.41529 |
| C | 2.13580  | 1.18509  | 0.32488  |
| C | 3.55748  | 3.06612  | -0.09075 |
| C | 1.50907  | 2.73452  | -1.28402 |
| C | 2.66304  | 3.50826  | -1.05015 |
| H | 4.45276  | 3.64161  | 0.11724  |
| H | 2.83162  | 4.42754  | -1.59803 |
| C | 2.08635  | -1.38096 | 0.39959  |

|    |          |          |          |    |          |          |          |
|----|----------|----------|----------|----|----------|----------|----------|
| C  | 3.29555  | 1.89481  | 0.62876  | H  | -4.21208 | -3.90069 | -0.00990 |
| H  | 3.96834  | 1.55482  | 1.40566  | H  | -2.67352 | -4.20797 | -1.93223 |
| N  | -0.69920 | -0.06813 | 0.86916  | C  | -2.10422 | 1.20387  | 0.62478  |
| N  | 1.48926  | -1.65202 | -0.77606 | C  | -3.18110 | -2.15174 | 0.72463  |
| N  | 1.28825  | 1.58587  | -0.62926 | H  | -3.83091 | -1.99104 | 1.57365  |
| C  | -2.17272 | 0.35607  | 2.70618  | N  | 0.61753  | -0.25531 | 1.07288  |
| H  | -3.17771 | 0.52542  | 3.07048  | N  | -1.41101 | 1.42291  | -0.50876 |
| C  | -3.10085 | 0.04092  | 0.39828  | N  | -1.27956 | -1.46809 | -0.56139 |
| C  | -4.25772 | -0.63800 | 0.81902  | C  | 2.18096  | -0.10113 | 2.85207  |
| C  | -3.08625 | 0.69596  | -0.89519 | H  | 3.20425  | -0.02497 | 3.19121  |
| C  | -5.40826 | -0.72211 | 0.04178  | C  | 2.96927  | -0.10791 | 0.46208  |
| H  | -4.24196 | -1.13536 | 1.78433  | C  | 4.27253  | -0.54476 | 0.76095  |
| C  | -4.29885 | 0.60256  | -1.65165 | C  | 2.71592  | 0.47684  | -0.81317 |
| C  | -5.41610 | -0.08322 | -1.20576 | C  | 5.31561  | -0.40026 | -0.14097 |
| H  | -6.27306 | -1.27227 | 0.39408  | H  | 4.46328  | -1.02155 | 1.71517  |
| H  | -4.31109 | 1.09949  | -2.61742 | C  | 3.79249  | 0.63581  | -1.70839 |
| H  | -6.30305 | -0.12653 | -1.83176 | C  | 5.06883  | 0.20745  | -1.37755 |
| O  | -2.06963 | 1.34568  | -1.36309 | H  | 6.30658  | -0.75787 | 0.11020  |
| N  | 0.55430  | 3.08870  | -2.21638 | H  | 3.58990  | 1.09797  | -2.66749 |
| H  | -0.37056 | 2.69973  | -2.05129 | H  | 5.87563  | 0.33451  | -2.09111 |
| N  | 1.20465  | -3.02731 | -2.63419 | O  | 1.51152  | 0.91443  | -1.18378 |
| H  | 0.35224  | -2.52579 | -2.83350 | N  | -0.63400 | -2.62059 | -2.49613 |
| H  | 0.55285  | 4.05054  | -2.52237 | H  | 0.28444  | -2.20293 | -2.47260 |
| H  | 1.19777  | -3.98104 | -2.96454 | N  | -0.82077 | 2.74499  | -2.31741 |
| Na | -0.27519 | -0.03519 | -1.48730 | H  | 0.05640  | 2.23834  | -2.34529 |
|    |          |          |          | H  | -0.68421 | -3.48015 | -3.02176 |
|    |          |          |          | H  | -0.77600 | 3.67915  | -2.69666 |
|    |          |          |          | Ni | 0.10105  | -0.14462 | -0.76410 |

HL-NH2 Ni (II)

$\Delta G = -2706.439821$

|   |          |          |          |
|---|----------|----------|----------|
| C | 1.90759  | -0.17717 | 1.47784  |
| C | 1.13945  | -0.08162 | 3.76478  |
| C | -0.17843 | -0.09368 | 3.31042  |
| H | 1.34879  | -0.02308 | 4.82604  |
| C | -0.40968 | -0.16566 | 1.94424  |
| H | -1.01030 | -0.03318 | 3.99932  |
| C | -1.82627 | -0.11069 | 1.37589  |
| H | -2.51161 | -0.14779 | 2.22013  |
| C | -3.03663 | 2.10607  | 1.10886  |
| C | -3.25019 | 3.28424  | 0.37959  |
| H | -3.58158 | 1.90428  | 2.02123  |
| C | -1.57743 | 2.57110  | -1.18788 |
| C | -2.52504 | 3.52923  | -0.76810 |
| H | -3.97815 | 4.00977  | 0.72363  |
| H | -2.66258 | 4.43911  | -1.33890 |
| C | -2.11775 | -1.30331 | 0.48935  |
| C | -3.38859 | -3.21394 | -0.16492 |
| C | -1.46670 | -2.49622 | -1.42327 |
| C | -2.53982 | -3.39073 | -1.23521 |

HL-NH2 V (II)

$\Delta G = -2142.16889$

|   |          |          |          |
|---|----------|----------|----------|
| C | 1.86745  | -0.06257 | 1.45671  |
| C | 1.02165  | -0.28661 | 3.72738  |
| C | -0.28677 | -0.19934 | 3.24292  |
| H | 1.20870  | -0.41060 | 4.78645  |
| C | -0.47960 | -0.07204 | 1.88317  |
| H | -1.13660 | -0.24805 | 3.91261  |
| C | -1.87441 | -0.04517 | 1.25732  |
| H | -2.58805 | -0.08557 | 2.07829  |
| C | -3.20941 | 2.08229  | 0.91334  |
| C | -3.43284 | 3.28256  | 0.22320  |
| H | -3.83978 | 1.79444  | 1.74412  |
| C | -1.56120 | 2.77605  | -1.19134 |
| C | -2.61182 | 3.63729  | -0.82544 |
| H | -4.24749 | 3.93401  | 0.51613  |
| H | -2.75998 | 4.56202  | -1.36873 |
| C | -2.12175 | -1.31178 | 0.42140  |

|   |          |          |          |   |          |          |          |
|---|----------|----------|----------|---|----------|----------|----------|
| C | -3.29385 | -3.34113 | -0.06186 | H | -4.39991 | 3.78350  | -0.02402 |
| C | -1.36378 | -2.69362 | -1.33578 | H | -3.02843 | 4.09029  | -2.06416 |
| C | -2.39824 | -3.60941 | -1.07785 | C | -2.03999 | -1.25089 | 0.69631  |
| H | -4.09854 | -4.03653 | 0.14470  | C | -3.16994 | -3.34478 | 0.49871  |
| H | -2.47820 | -4.50955 | -1.67417 | C | -1.32285 | -2.79464 | -0.93884 |
| C | -2.16627 | 1.27160  | 0.51693  | C | -2.32804 | -3.69754 | -0.52847 |
| C | -3.15516 | -2.17930 | 0.71126  | H | -3.94058 | -4.03274 | 0.82470  |
| H | -3.83718 | -1.96768 | 1.52408  | H | -2.40899 | -4.65724 | -1.02189 |
| N | 0.56876  | -0.00207 | 1.00664  | C | -2.19223 | 1.26618  | 0.38597  |
| N | -1.35997 | 1.60815  | -0.53517 | C | -3.02585 | -2.10046 | 1.13792  |
| N | -1.25931 | -1.55337 | -0.60923 | H | -3.67201 | -1.81229 | 1.95524  |
| C | 2.08009  | -0.22909 | 2.83321  | N | 0.61320  | 0.20817  | 1.00128  |
| H | 3.08629  | -0.32843 | 3.21122  | N | -1.43407 | 1.42082  | -0.74668 |
| C | 2.98366  | 0.03976  | 0.49141  | N | -1.21645 | -1.57678 | -0.34168 |
| C | 4.29714  | 0.23805  | 0.97758  | C | 2.15905  | 0.44347  | 2.79986  |
| C | 2.84268  | -0.04682 | -0.92437 | H | 3.17760  | 0.47125  | 3.15651  |
| C | 5.40181  | 0.31085  | 0.14907  | C | 3.01546  | 0.21813  | 0.45687  |
| H | 4.45692  | 0.35959  | 2.03983  | C | 4.30658  | 0.66568  | 0.79360  |
| C | 3.96975  | 0.01952  | -1.75588 | C | 2.85250  | -0.34071 | -0.83018 |
| C | 5.23930  | 0.19072  | -1.23351 | C | 5.37283  | 0.53856  | -0.08504 |
| H | 6.38459  | 0.46816  | 0.57593  | H | 4.47739  | 1.14325  | 1.74883  |
| H | 3.80808  | -0.06393 | -2.82389 | C | 3.92268  | -0.48769 | -1.71347 |
| H | 6.09565  | 0.24260  | -1.89549 | C | 5.18480  | -0.05033 | -1.33843 |
| O | 1.64834  | -0.19559 | -1.55767 | H | 6.35021  | 0.90425  | 0.20434  |
| N | -0.45364 | -2.88019 | -2.33397 | H | 3.74001  | -0.93434 | -2.68266 |
| H | 0.41654  | -2.36547 | -2.31942 | H | 6.01664  | -0.15501 | -2.02444 |
| N | -0.73344 | 3.06729  | -2.23475 | O | 1.62068  | -0.74836 | -1.23343 |
| H | 0.13674  | 2.57194  | -2.35183 | N | -0.45973 | -3.10038 | -1.93659 |
| H | -0.43382 | -3.76637 | -2.81266 | H | 0.42178  | -2.61223 | -2.01333 |
| H | -0.78671 | 3.97579  | -2.66613 | N | -0.96950 | 2.60970  | -2.71629 |
| V | -0.01745 | 0.04908  | -0.85250 | H | -0.12318 | 2.09858  | -2.90405 |
|   |          |          |          | H | -0.47585 | -4.03488 | -2.31520 |
|   |          |          |          | H | -1.17326 | 3.37949  | -3.33358 |
|   |          |          |          | V | 0.02252  | -0.07642 | -0.92666 |

HL-NH2 V(III)

$\Delta G = -2141.996018$

|   |          |         |          |
|---|----------|---------|----------|
| C | 1.90512  | 0.30241 | 1.42791  |
| C | 1.11494  | 0.52302 | 3.70391  |
| C | -0.19609 | 0.43470 | 3.24223  |
| H | 1.31764  | 0.63657 | 4.76144  |
| C | -0.41111 | 0.26031 | 1.88608  |
| H | -1.03685 | 0.48525 | 3.92097  |
| C | -1.82332 | 0.12101 | 1.32785  |
| H | -2.50456 | 0.18697 | 2.17245  |
| C | -3.24966 | 2.09062 | 0.67565  |
| C | -3.56427 | 3.12458 | -0.22632 |
| H | -3.82928 | 1.93940 | 1.57541  |
| C | -1.71944 | 2.43436 | -1.61026 |
| C | -2.81213 | 3.29963 | -1.35791 |

HL-NH2 Zn(II)

$\Delta G = -2977.513327$

|   |          |          |         |
|---|----------|----------|---------|
| C | -1.88443 | 0.09970  | 1.48198 |
| C | -1.10221 | 0.52669  | 3.73135 |
| C | 0.21751  | 0.40048  | 3.29390 |
| H | -1.30949 | 0.74903  | 4.77155 |
| C | 0.42913  | 0.14858  | 1.94671 |
| H | 1.05035  | 0.51872  | 3.97446 |
| C | 1.83992  | 0.09931  | 1.34856 |
| H | 2.53891  | 0.17352  | 2.17871 |
| C | 3.17049  | -2.02403 | 1.12141 |
| C | 3.45722  | -3.21874 | 0.44533 |

|    |          |          |          |   |              |              |              |
|----|----------|----------|----------|---|--------------|--------------|--------------|
| H  | 3.72713  | -1.73302 | 2.00142  | H | 0.815120000  | -1.344319000 | 1.492745000  |
| C  | 1.71011  | -2.70340 | -1.12279 | N | 0.225135000  | -1.878071000 | -0.429515000 |
| C  | 2.73677  | -3.56393 | -0.67335 | C | -0.483361000 | -0.598246000 | -0.529778000 |
| H  | 4.24500  | -3.87026 | 0.80447  | H | -1.043423000 | -0.585180000 | -1.469205000 |
| H  | 2.93695  | -4.47982 | -1.21433 | H | -1.229406000 | -0.481005000 | 0.269696000  |
| C  | 2.08629  | 1.32111  | 0.45683  | C | -0.350752000 | -2.964383000 | -1.212608000 |
| C  | 3.19592  | 3.36420  | -0.08695 | H | -0.391517000 | -2.653927000 | -2.263118000 |
| C  | 1.35794  | 2.55354  | -1.40122 | H | 0.341518000  | -3.810361000 | -1.178382000 |
| C  | 2.34570  | 3.53170  | -1.15901 | C | -1.766618000 | -3.520233000 | -0.865892000 |
| H  | 3.95661  | 4.10864  | 0.11707  | O | -2.128012000 | -4.502230000 | -1.576867000 |
| H  | 2.41268  | 4.39940  | -1.80260 | O | -2.436306000 | -2.979155000 | 0.049482000  |
| C  | 2.15828  | -1.21839 | 0.63892  | C | -1.766618000 | 3.208435000  | 1.143156000  |
| C  | 3.06679  | 2.24827  | 0.75469  | O | -1.847097000 | 3.699685000  | 2.306332000  |
| H  | 3.70815  | 2.11810  | 1.61567  | O | -2.574973000 | 3.404929000  | 0.201722000  |
| N  | -0.59535 | -0.01039 | 1.09259  | C | -0.558290000 | 2.253827000  | 0.939874000  |
| N  | 1.43712  | -1.55384 | -0.46590 | H | 0.303746000  | 2.694183000  | 1.461002000  |
| N  | 1.27436  | 1.46235  | -0.61452 | H | -0.815120000 | 1.344319000  | 1.492745000  |
| C  | -2.14898 | 0.39556  | 2.83331  | N | -0.225135000 | 1.878071000  | -0.429515000 |
| H  | -3.16408 | 0.54360  | 3.17147  | C | 0.483361000  | 0.598246000  | -0.529778000 |
| C  | -2.97331 | -0.08091 | 0.49159  | H | 1.043423000  | 0.585180000  | -1.469205000 |
| C  | -4.23912 | -0.47665 | 0.97784  | H | 1.229406000  | 0.481005000  | 0.269696000  |
| C  | -2.83604 | 0.14791  | -0.92048 | C | 0.350752000  | 2.964383000  | -1.212608000 |
| C  | -5.35116 | -0.61015 | 0.16326  | H | 0.391517000  | 2.653927000  | -2.263118000 |
| H  | -4.34514 | -0.70860 | 2.03039  | H | -0.341518000 | 3.810361000  | -1.178382000 |
| C  | -3.99718 | 0.03565  | -1.72241 | C | 1.766618000  | 3.520233000  | -0.865892000 |
| C  | -5.22512 | -0.33311 | -1.20299 | O | 2.128012000  | 4.502230000  | -1.576867000 |
| H  | -6.29843 | -0.92874 | 0.58118  | O | 2.436306000  | 2.979155000  | 0.049482000  |
| H  | -3.88089 | 0.23582  | -2.78181 |   |              |              |              |
| H  | -6.08326 | -0.42078 | -1.86099 |   |              |              |              |
| O  | -1.70947 | 0.48320  | -1.53861 |   |              |              |              |
| N  | 0.47812  | 2.64796  | -2.43985 |   |              |              |              |
| H  | -0.38932 | 2.12509  | -2.37445 |   |              |              |              |
| N  | 1.01319  | -3.00820 | -2.25172 |   |              |              |              |
| H  | 0.13607  | -2.55737 | -2.46039 |   |              |              |              |
| H  | 0.41101  | 3.53416  | -2.91667 |   |              |              |              |
| H  | 1.11601  | -3.93525 | -2.63390 |   |              |              |              |
| Zn | -0.01439 | -0.14544 | -0.88385 |   |              |              |              |

EDTA Al (III)

$\Delta G = -1342.623362$

EDTA-4H

$\Delta G = -1100.357742$

|   |              |              |             |   |              |              |              |
|---|--------------|--------------|-------------|---|--------------|--------------|--------------|
| C | 1.766618000  | -3.208435000 | 1.143156000 | C | -1.452641000 | 2.267944000  | 0.800801000  |
| O | 1.847097000  | -3.699685000 | 2.306332000 | O | -0.676602000 | 1.510414000  | 1.525453000  |
| O | 2.574973000  | -3.404929000 | 0.201722000 | O | -2.240399000 | 3.094593000  | 1.239352000  |
| C | 0.558290000  | -2.253827000 | 0.939874000 | C | -1.305796000 | 2.074756000  | -0.733249000 |
| H | -0.303746000 | -2.694183000 | 1.461002000 | H | -2.119236000 | 1.436563000  | -1.081261000 |
|   |              |              |             | H | -1.380391000 | 3.039065000  | -1.240968000 |
|   |              |              |             | N | 0.000000000  | 1.412269000  | -0.965332000 |
|   |              |              |             | C | 0.249019000  | 0.722682000  | -2.264541000 |
|   |              |              |             | H | -0.199540000 | 1.269030000  | -3.098677000 |
|   |              |              |             | H | 1.328426000  | 0.732984000  | -2.418005000 |
|   |              |              |             | C | 1.110584000  | 2.367071000  | -0.689960000 |
|   |              |              |             | H | 1.505075000  | 2.798159000  | -1.611389000 |
|   |              |              |             | H | 0.747280000  | 3.193329000  | -0.077422000 |
|   |              |              |             | C | 2.213125000  | 1.669071000  | 0.104356000  |
|   |              |              |             | O | 3.330433000  | 2.167319000  | 0.191157000  |
|   |              |              |             | O | 1.834894000  | 0.566809000  | 0.666296000  |
|   |              |              |             | C | 1.452641000  | -2.267944000 | 0.800801000  |
|   |              |              |             | O | 0.676602000  | -1.510414000 | 1.525453000  |

|    |              |              |              |    |              |              |              |
|----|--------------|--------------|--------------|----|--------------|--------------|--------------|
| O  | 2.240399000  | -3.094593000 | 1.239352000  | O  | 4.762152000  | -0.923813000 | -0.039338000 |
| C  | 1.305796000  | -2.074756000 | -0.733249000 | O  | 2.694145000  | -1.792873000 | 0.114360000  |
| H  | 2.119236000  | -1.436563000 | -1.081261000 | Be | -1.266367000 | 0.395529000  | 0.794144000  |
| H  | 1.380391000  | -3.039065000 | -1.240968000 |    |              |              |              |
| N  | 0.000000000  | -1.412269000 | -0.965332000 |    |              |              |              |
| C  | -0.249019000 | -0.722682000 | -2.264541000 |    |              |              |              |
| H  | 0.199540000  | -1.269030000 | -3.098677000 |    |              |              |              |
| H  | -1.328426000 | -0.732984000 | -2.418005000 |    |              |              |              |
| C  | -1.110584000 | -2.367071000 | -0.689960000 |    |              |              |              |
| H  | -1.505075000 | -2.798159000 | -1.611389000 |    |              |              |              |
| H  | -0.747280000 | -3.193329000 | -0.077422000 |    |              |              |              |
| C  | -2.213125000 | -1.669071000 | 0.104356000  |    |              |              |              |
| O  | -3.330433000 | -2.167319000 | 0.191157000  |    |              |              |              |
| O  | -1.834894000 | -0.566809000 | 0.666296000  |    |              |              |              |
| Al | 0.000000000  | 0.000000000  | 0.615776000  |    |              |              |              |

EDTA Be (II)

$\Delta G = -1115.033923$

|   |              |              |              |
|---|--------------|--------------|--------------|
| C | -0.888592000 | -2.024787000 | 1.223534000  |
| O | -1.241350000 | -0.905024000 | 1.774078000  |
| O | -0.805149000 | -3.106009000 | 1.802771000  |
| C | -0.515180000 | -1.888953000 | -0.254367000 |
| H | 0.576896000  | -1.820769000 | -0.280680000 |
| H | -0.833892000 | -2.765147000 | -0.825304000 |
| N | -1.107212000 | -0.628860000 | -0.769761000 |
| C | -0.416235000 | -0.076895000 | -1.973898000 |
| H | -0.613649000 | -0.725667000 | -2.835589000 |
| H | -0.894391000 | 0.881855000  | -2.189796000 |
| C | -2.558881000 | -0.796247000 | -1.084561000 |
| H | -2.734415000 | -0.863560000 | -2.159639000 |
| H | -2.925445000 | -1.723882000 | -0.638489000 |
| C | -3.378418000 | 0.345395000  | -0.473441000 |
| O | -4.525093000 | 0.568344000  | -0.854739000 |
| O | -2.755839000 | 0.976729000  | 0.466853000  |
| C | 0.510671000  | 2.409541000  | 0.908343000  |
| O | -0.356501000 | 1.563263000  | 1.357200000  |
| O | 0.853528000  | 3.421652000  | 1.523756000  |
| C | 1.100114000  | 2.111169000  | -0.476287000 |
| H | 0.310418000  | 2.337543000  | -1.199268000 |
| H | 1.913637000  | 2.819299000  | -0.672863000 |
| N | 1.529401000  | 0.719515000  | -0.616002000 |
| C | 1.100295000  | 0.084072000  | -1.854930000 |
| H | 1.430791000  | 0.637728000  | -2.753743000 |
| H | 1.575001000  | -0.895705000 | -1.899331000 |
| C | 2.962800000  | 0.575146000  | -0.359995000 |
| H | 3.565088000  | 0.998209000  | -1.182703000 |
| H | 3.207195000  | 1.165665000  | 0.528433000  |
| C | 3.504388000  | -0.851847000 | -0.075531000 |

EDTA B (III)

$\Delta G = -1124.913382$

|   |              |              |              |
|---|--------------|--------------|--------------|
| C | -0.694813000 | -2.204090000 | 0.892591000  |
| O | -1.375338000 | -1.227260000 | 1.499642000  |
| O | -0.498086000 | -3.289519000 | 1.380914000  |
| C | -0.185614000 | -1.749455000 | -0.465309000 |
| H | 0.884159000  | -1.524172000 | -0.358991000 |
| H | -0.320110000 | -2.512886000 | -1.229683000 |
| N | -0.961307000 | -0.504707000 | -0.770705000 |
| C | -0.255006000 | 0.510966000  | -1.652127000 |
| H | -0.409470000 | 0.201142000  | -2.686475000 |
| H | -0.794280000 | 1.451840000  | -1.523718000 |
| C | -2.313374000 | -0.808383000 | -1.365675000 |
| H | -2.343308000 | -0.588619000 | -2.430450000 |
| H | -2.552890000 | -1.863665000 | -1.227704000 |
| C | -3.327992000 | 0.023294000  | -0.593319000 |
| O | -4.470851000 | 0.205352000  | -0.930556000 |
| O | -2.781299000 | 0.508424000  | 0.518587000  |
| C | -0.190431000 | 2.200723000  | 0.903204000  |
| O | -0.557367000 | 0.981313000  | 1.347086000  |
| O | -0.895058000 | 3.176466000  | 0.995841000  |
| C | 1.241651000  | 2.249209000  | 0.385029000  |
| H | 1.308092000  | 3.080551000  | -0.334064000 |
| H | 1.846328000  | 2.536339000  | 1.251344000  |
| N | 1.728349000  | 0.980021000  | -0.127471000 |
| C | 1.253429000  | 0.680918000  | -1.473791000 |
| H | 1.530215000  | 1.475929000  | -2.191319000 |
| H | 1.754268000  | -0.227654000 | -1.804521000 |
| C | 3.184314000  | 0.844030000  | -0.030211000 |
| H | 3.708237000  | 1.452502000  | -0.785902000 |
| H | 3.496776000  | 1.225783000  | 0.945096000  |
| C | 3.743383000  | -0.602313000 | -0.124854000 |
| O | 4.998845000  | -0.668652000 | -0.142925000 |
| O | 2.936754000  | -1.567051000 | -0.158344000 |
| B | -1.414281000 | 0.028746000  | 0.745689000  |

EDTA Ca (II)

$\Delta G = -1777.944127$

|   |              |             |              |
|---|--------------|-------------|--------------|
| C | -0.195087000 | 3.138674000 | 0.446157000  |
| O | -0.043987000 | 2.382880000 | 1.456799000  |
| O | -0.516273000 | 4.343572000 | 0.465770000  |
| C | 0.000000000  | 2.488892000 | -0.946404000 |
| H | -0.999891000 | 2.239308000 | -1.311523000 |
| H | 0.414299000  | 3.235143000 | -1.638413000 |



|                           |              |              |              |                           |              |              |              |
|---------------------------|--------------|--------------|--------------|---------------------------|--------------|--------------|--------------|
| N                         | 0.817298000  | 1.268386000  | -0.892491000 | O                         | 2.324376000  | -3.108983000 | 1.230673000  |
| C                         | 0.654475000  | 0.394140000  | -2.071641000 | C                         | 1.315938000  | -2.064600000 | -0.684249000 |
| H                         | 0.717788000  | 0.970287000  | -3.007947000 | H                         | 2.109647000  | -1.393207000 | -1.013228000 |
| H                         | 1.498759000  | -0.299156000 | -2.081531000 | H                         | 1.412526000  | -3.016492000 | -1.217088000 |
| C                         | 2.238216000  | 1.596917000  | -0.683778000 | N                         | 0.000000000  | -1.426078000 | -0.910174000 |
| H                         | 2.753332000  | 1.792569000  | -1.633184000 | C                         | -0.252817000 | -0.720979000 | -2.204046000 |
| H                         | 2.302521000  | 2.516894000  | -0.095949000 | H                         | 0.184691000  | -1.268118000 | -3.046361000 |
| C                         | 3.020595000  | 0.535714000  | 0.119891000  | H                         | -1.334041000 | -0.724617000 | -2.346868000 |
| O                         | 4.257950000  | 0.504388000  | -0.033570000 | C                         | -1.089982000 | -2.413275000 | -0.675356000 |
| O                         | 2.343350000  | -0.187557000 | 0.915719000  | H                         | -1.333763000 | -2.939144000 | -1.603167000 |
| C                         | 0.195087000  | -3.138674000 | 0.446157000  | H                         | -0.744522000 | -3.160927000 | 0.039637000  |
| O                         | 0.043987000  | -2.382880000 | 1.456799000  | C                         | -2.349685000 | -1.768228000 | -0.069648000 |
| O                         | 0.516273000  | -4.343572000 | 0.465770000  | O                         | -3.413894000 | -2.416083000 | -0.141931000 |
| C                         | 0.000000000  | -2.488892000 | -0.946404000 | O                         | -2.175451000 | -0.644204000 | 0.485740000  |
| H                         | 0.999891000  | -2.239308000 | -1.311523000 | Co                        | 0.000000000  | 0.000000000  | 0.508012000  |
| H                         | -0.414299000 | -3.235143000 | -1.638413000 |                           |              |              |              |
| N                         | -0.817298000 | -1.268386000 | -0.892491000 | EDTA Co(III)              |              |              |              |
| C                         | -0.654475000 | -0.394140000 | -2.071641000 | $\Delta G = -2482.822977$ |              |              |              |
| H                         | -0.717788000 | -0.970287000 | -3.007947000 | C                         | -0.803201000 | 2.503143000  | 1.083008000  |
| H                         | -1.498759000 | 0.299156000  | -2.081531000 | O                         | -0.210773000 | 1.489871000  | 1.635941000  |
| C                         | -2.238216000 | -1.596917000 | -0.683778000 | O                         | -1.221410000 | 3.487067000  | 1.685709000  |
| H                         | -2.753332000 | -1.792569000 | -1.633184000 | C                         | -0.975771000 | 2.402938000  | -0.447768000 |
| H                         | -2.302521000 | -2.516894000 | -0.095949000 | H                         | -1.987552000 | 2.055838000  | -0.651604000 |
| C                         | -3.020595000 | -0.535714000 | 0.119891000  | H                         | -0.831555000 | 3.375121000  | -0.921737000 |
| O                         | -4.257950000 | -0.504388000 | -0.033570000 | N                         | 0.000000000  | 1.396868000  | -0.949692000 |
| O                         | -2.343350000 | 0.187557000  | 0.915719000  | C                         | -0.355795000 | 0.678591000  | -2.215388000 |
| Ca                        | 0.000000000  | 0.000000000  | 1.239290000  | H                         | -1.437699000 | 0.552642000  | -2.237141000 |
|                           |              |              |              | H                         | -0.071293000 | 1.266665000  | -3.090996000 |
| EDTA Co(II)               |              |              |              | C                         | 1.377988000  | 1.989671000  | -1.010540000 |
| $\Delta G = -2482.948385$ |              |              |              | H                         | 1.690497000  | 2.120602000  | -2.047520000 |
| C                         | -1.481875000 | 2.285615000  | 0.846467000  | H                         | 1.363145000  | 2.979019000  | -0.552788000 |
| O                         | -0.716975000 | 1.584573000  | 1.603157000  | C                         | 2.402471000  | 1.148344000  | -0.254830000 |
| O                         | -2.324376000 | 3.108983000  | 1.230673000  | O                         | 3.595350000  | 1.429185000  | -0.311687000 |
| C                         | -1.315938000 | 2.064600000  | -0.684249000 | O                         | 1.903263000  | 0.169021000  | 0.425184000  |
| H                         | -2.109647000 | 1.393207000  | -1.013228000 | C                         | 0.803201000  | -2.503143000 | 1.083008000  |
| H                         | -1.412526000 | 3.016492000  | -1.217088000 | O                         | 0.210773000  | -1.489871000 | 1.635941000  |
| N                         | 0.000000000  | 1.426078000  | -0.910174000 | O                         | 1.221410000  | -3.487067000 | 1.685709000  |
| C                         | 0.252817000  | 0.720979000  | -2.204046000 | C                         | 0.975771000  | -2.402938000 | -0.447768000 |
| H                         | -0.184691000 | 1.268118000  | -3.046361000 | H                         | 1.987552000  | -2.055838000 | -0.651604000 |
| H                         | 1.334041000  | 0.724617000  | -2.346868000 | H                         | 0.831555000  | -3.375121000 | -0.921737000 |
| C                         | 1.089982000  | 2.413275000  | -0.675356000 | N                         | 0.000000000  | -1.396868000 | -0.949692000 |
| H                         | 1.333763000  | 2.939144000  | -1.603167000 | C                         | 0.355795000  | -0.678591000 | -2.215388000 |
| H                         | 0.744522000  | 3.160927000  | 0.039637000  | H                         | 1.437699000  | -0.552642000 | -2.237141000 |
| C                         | 2.349685000  | 1.768228000  | -0.069648000 | H                         | 0.071293000  | -1.266665000 | -3.090996000 |
| O                         | 3.413894000  | 2.416083000  | -0.141931000 | C                         | -1.377988000 | -1.989671000 | -1.010540000 |
| O                         | 2.175451000  | 0.644204000  | 0.485740000  | H                         | -1.690497000 | -2.120602000 | -2.047520000 |
| C                         | 1.481875000  | -2.285615000 | 0.846467000  | H                         | -1.363145000 | -2.979019000 | -0.552788000 |
| O                         | 0.716975000  | -1.584573000 | 1.603157000  | C                         | -2.402471000 | -1.148344000 | -0.254830000 |

|                           |              |              |              |                           |              |              |              |
|---------------------------|--------------|--------------|--------------|---------------------------|--------------|--------------|--------------|
| O                         | -3.595350000 | -1.429185000 | -0.311687000 | N                         | 0.000000000  | 1.438107000  | -0.950717000 |
| O                         | -1.903263000 | -0.169021000 | 0.425184000  | C                         | 0.265017000  | 0.714724000  | -2.239752000 |
| Co                        | 0.000000000  | 0.000000000  | 0.425301000  | H                         | -0.154860000 | 1.266727000  | -3.085468000 |
|                           |              |              |              | H                         | 1.347325000  | 0.702973000  | -2.369026000 |
| EDTA Cr(II)               |              |              |              | C                         | 1.121559000  | 2.389597000  | -0.690656000 |
| $\Delta G = -2144.673999$ |              |              |              | H                         | 1.460476000  | 2.855226000  | -1.618268000 |
| C                         | -0.296469000 | 2.883306000  | 0.665401000  | H                         | 0.778217000  | 3.185426000  | -0.029351000 |
| O                         | 0.000000000  | 1.985912000  | 1.523298000  | C                         | 2.266300000  | 1.670136000  | 0.020801000  |
| O                         | -0.668853000 | 4.044133000  | 0.913682000  | O                         | 3.388232000  | 2.163037000  | 0.057039000  |
| C                         | -0.190248000 | 2.464951000  | -0.826800000 | O                         | 1.917695000  | 0.554496000  | 0.580917000  |
| H                         | -1.193505000 | 2.204275000  | -1.171926000 | C                         | 1.477832000  | -2.359038000 | 0.766000000  |
| H                         | 0.165679000  | 3.310349000  | -1.426955000 | O                         | 0.709132000  | -1.639298000 | 1.528320000  |
| N                         | 0.688935000  | 1.285127000  | -0.939342000 | O                         | 2.291079000  | -3.188422000 | 1.158266000  |
| C                         | 0.590856000  | 0.484400000  | -2.192025000 | C                         | 1.303323000  | -2.121830000 | -0.757556000 |
| H                         | 0.532132000  | 1.129638000  | -3.078196000 | H                         | 2.115694000  | -1.482239000 | -1.104503000 |
| H                         | 1.520941000  | -0.081245000 | -2.274686000 | H                         | 1.350309000  | -3.070214000 | -1.298710000 |
| C                         | 2.101879000  | 1.650942000  | -0.680771000 | N                         | 0.000000000  | -1.438107000 | -0.950717000 |
| H                         | 2.637435000  | 1.882067000  | -1.607229000 | C                         | -0.265017000 | -0.714724000 | -2.239752000 |
| H                         | 2.132984000  | 2.547567000  | -0.059198000 | H                         | 0.154860000  | -1.266727000 | -3.085468000 |
| C                         | 2.828675000  | 0.548074000  | 0.101101000  | H                         | -1.347325000 | -0.702973000 | -2.369026000 |
| O                         | 4.069416000  | 0.550524000  | 0.126206000  | C                         | -1.121559000 | -2.389597000 | -0.690656000 |
| O                         | 2.067131000  | -0.283081000 | 0.704833000  | H                         | -1.460476000 | -2.855226000 | -1.618268000 |
| C                         | 0.296469000  | -2.883306000 | 0.665401000  | H                         | -0.778217000 | -3.185426000 | -0.029351000 |
| O                         | 0.000000000  | -1.985912000 | 1.523298000  | C                         | -2.266300000 | -1.670136000 | 0.020801000  |
| O                         | 0.668853000  | -4.044133000 | 0.913682000  | O                         | -3.388232000 | -2.163037000 | 0.057039000  |
| C                         | 0.190248000  | -2.464951000 | -0.826800000 | O                         | -1.917695000 | -0.554496000 | 0.580917000  |
| H                         | 1.193505000  | -2.204275000 | -1.171926000 | Cr                        | 0.000000000  | 0.000000000  | 0.580917000  |
| H                         | -0.165679000 | -3.310349000 | -1.426955000 |                           |              |              |              |
| N                         | -0.688935000 | -1.285127000 | -0.939342000 | EDTA Cu(II)               |              |              |              |
| C                         | -0.590856000 | -0.484400000 | -2.192025000 | $\Delta G = -2740.670145$ |              |              |              |
| H                         | -0.532132000 | -1.129638000 | -3.078196000 | C                         | -0.225914000 | 2.873470000  | 0.376440000  |
| H                         | -1.520941000 | 0.081245000  | -2.274686000 | O                         | -0.094584000 | 1.995823000  | 1.294569000  |
| C                         | -2.101879000 | -1.650942000 | -0.680771000 | O                         | -0.534688000 | 4.063040000  | 0.566018000  |
| H                         | -2.637435000 | -1.882067000 | -1.607229000 | C                         | 0.000000000  | 2.408850000  | -1.077894000 |
| H                         | -2.132984000 | -2.547567000 | -0.059198000 | H                         | -0.988391000 | 2.190711000  | -1.491704000 |
| C                         | -2.828675000 | -0.548074000 | 0.101101000  | H                         | 0.408787000  | 3.251230000  | -1.653661000 |
| O                         | -4.069416000 | -0.550524000 | 0.126206000  | N                         | 0.835191000  | 1.214967000  | -1.152540000 |
| O                         | -2.067131000 | 0.283081000  | 0.704833000  | C                         | 0.656478000  | 0.394735000  | -2.355135000 |
| Cr                        | 0.000000000  | 0.000000000  | 0.637333000  | H                         | 0.697497000  | 0.996742000  | -3.277048000 |
|                           |              |              |              | H                         | 1.497790000  | -0.299878000 | -2.403599000 |
| EDTA Cr(III)              |              |              |              | C                         | 2.236888000  | 1.478545000  | -0.820840000 |
| $\Delta G = -2144.591144$ |              |              |              | H                         | 2.893415000  | 1.320335000  | -1.682863000 |
| C                         | -1.477832000 | 2.359038000  | 0.766000000  | H                         | 2.364681000  | 2.528421000  | -0.538846000 |
| O                         | -0.709132000 | 1.639298000  | 1.528320000  | C                         | 2.800159000  | 0.654071000  | 0.353198000  |
| O                         | -2.291079000 | 3.188422000  | 1.158266000  | O                         | 4.027953000  | 0.704948000  | 0.541404000  |
| C                         | -1.303323000 | 2.121830000  | -0.757556000 | O                         | 1.986638000  | -0.015745000 | 1.076150000  |
| H                         | -2.115694000 | 1.482239000  | -1.104503000 | C                         | 0.225914000  | -2.873470000 | 0.376440000  |
| H                         | -1.350309000 | 3.070214000  | -1.298710000 | O                         | 0.094584000  | -1.995823000 | 1.294569000  |

|                           |              |              |              |                           |              |              |              |
|---------------------------|--------------|--------------|--------------|---------------------------|--------------|--------------|--------------|
| O                         | 0.534688000  | -4.063040000 | 0.566018000  | O                         | 4.185226000  | 1.337817000  | -0.296363000 |
| C                         | 0.000000000  | -2.408850000 | -1.077894000 | O                         | 2.217719000  | 2.158416000  | 0.419462000  |
| H                         | 0.988391000  | -2.190711000 | -1.491704000 | Fe                        | -0.351537000 | -0.369143000 | -0.583891000 |
| H                         | -0.408787000 | -3.251230000 | -1.653661000 |                           |              |              |              |
| N                         | -0.835191000 | -1.214967000 | -1.152540000 | EDTA Fe(III)              |              |              |              |
| C                         | -0.656478000 | -0.394735000 | -2.355135000 | $\Delta G = -2363.750482$ |              |              |              |
| H                         | -0.697497000 | -0.996742000 | -3.277048000 | C                         | -1.454624000 | 2.304328000  | 0.764023000  |
| H                         | -1.497790000 | 0.299878000  | -2.403599000 | O                         | -0.676279000 | 1.567054000  | 1.496159000  |
| C                         | -2.236888000 | -1.478545000 | -0.820840000 | O                         | -2.246933000 | 3.138676000  | 1.188713000  |
| H                         | -2.893415000 | -1.320335000 | -1.682863000 | C                         | -1.308910000 | 2.075244000  | -0.760300000 |
| H                         | -2.364681000 | -2.528421000 | -0.538846000 | H                         | -2.119225000 | 1.430395000  | -1.099916000 |
| C                         | -2.800159000 | -0.654071000 | 0.353198000  | H                         | -1.357646000 | 3.021819000  | -1.303298000 |
| O                         | -4.027953000 | -0.704948000 | 0.541404000  | N                         | 0.000000000  | 1.397932000  | -0.958141000 |
| O                         | -1.986638000 | 0.015745000  | 1.076150000  | C                         | 0.267278000  | 0.709896000  | -2.264239000 |
| Cu                        | 0.000000000  | 0.000000000  | 0.857639000  | H                         | -0.154581000 | 1.281207000  | -3.095292000 |
|                           |              |              |              | H                         | 1.349376000  | 0.698493000  | -2.393512000 |
| EDTA Fe(II)               |              |              |              | C                         | 1.109956000  | 2.364576000  | -0.689585000 |
| $\Delta G = -2363.901456$ |              |              |              | H                         | 1.462517000  | 2.815532000  | -1.618517000 |
| C                         | -0.806342000 | 2.419850000  | -1.012091000 | H                         | 0.751469000  | 3.168462000  | -0.047482000 |
| O                         | -0.564087000 | 1.369057000  | -1.708592000 | C                         | 2.234485000  | 1.652318000  | 0.050806000  |
| O                         | -0.917603000 | 3.572041000  | -1.454515000 | O                         | 3.357648000  | 2.140768000  | 0.123570000  |
| C                         | -0.907778000 | 2.199795000  | 0.509774000  | O                         | 1.869104000  | 0.538557000  | 0.597597000  |
| H                         | 0.089011000  | 2.406586000  | 0.900482000  | C                         | 1.454624000  | -2.304328000 | 0.764023000  |
| H                         | -1.625262000 | 2.892108000  | 0.958873000  | O                         | 0.676279000  | -1.567054000 | 1.496159000  |
| N                         | -1.257144000 | 0.786754000  | 0.798749000  | O                         | 2.246933000  | -3.138676000 | 1.188713000  |
| C                         | -0.738422000 | 0.259979000  | 2.097879000  | C                         | 1.308910000  | -2.075244000 | -0.760300000 |
| H                         | -1.003350000 | 0.929000000  | 2.925340000  | H                         | 2.119225000  | -1.430395000 | -1.099916000 |
| H                         | -1.249487000 | -0.689190000 | 2.274180000  | H                         | 1.357646000  | -3.021819000 | -1.303298000 |
| C                         | -2.724258000 | 0.568185000  | 0.697156000  | N                         | 0.000000000  | -1.397932000 | -0.958141000 |
| H                         | -3.221424000 | 0.733771000  | 1.657127000  | C                         | -0.267278000 | -0.709896000 | -2.264239000 |
| H                         | -3.135004000 | 1.291925000  | -0.011061000 | H                         | 0.154581000  | -1.281207000 | -3.095292000 |
| C                         | -3.055829000 | -0.824459000 | 0.142321000  | H                         | -1.349376000 | -0.698493000 | -2.393512000 |
| O                         | -4.192067000 | -1.282579000 | 0.305212000  | C                         | -1.109956000 | -2.364576000 | -0.689585000 |
| O                         | -2.101954000 | -1.391419000 | -0.505558000 | H                         | -1.462517000 | -2.815532000 | -1.618517000 |
| C                         | 1.116418000  | -2.643763000 | -0.631819000 | H                         | -0.751469000 | -3.168462000 | -0.047482000 |
| O                         | 0.586851000  | -1.861861000 | -1.509057000 | C                         | -2.234485000 | -1.652318000 | 0.050806000  |
| O                         | 1.566310000  | -3.772230000 | -0.852765000 | O                         | -3.357648000 | -2.140768000 | 0.123570000  |
| C                         | 1.141072000  | -2.090088000 | 0.815250000  | O                         | -1.869104000 | -0.538557000 | 0.597597000  |
| H                         | 0.216528000  | -2.401974000 | 1.309055000  | Fe                        | 0.000000000  | 0.000000000  | 0.493266000  |
| H                         | 1.979599000  | -2.523914000 | 1.369855000  |                           |              |              |              |
| N                         | 1.210663000  | -0.598819000 | 0.791084000  | EDTA K(I)                 |              |              |              |
| C                         | 0.777219000  | 0.051160000  | 2.064742000  | $\Delta G = -1700.279805$ |              |              |              |
| H                         | 1.085859000  | -0.540635000 | 2.934340000  | C                         | 3.392361000  | -0.867552000 | -0.794682000 |
| H                         | 1.283489000  | 1.011909000  | 2.108347000  | O                         | 2.755068000  | -0.453995000 | -1.798094000 |
| C                         | 2.620340000  | -0.244773000 | 0.434809000  | O                         | 4.570322000  | -1.317305000 | -0.790264000 |
| H                         | 3.278916000  | -0.606087000 | 1.236773000  | C                         | 2.664765000  | -0.908552000 | 0.576821000  |
| H                         | 2.880090000  | -0.810041000 | -0.460171000 | H                         | 2.235047000  | -1.912881000 | 0.647992000  |
| C                         | 3.018113000  | 1.229912000  | 0.159743000  | H                         | 3.426741000  | -0.835396000 | 1.370957000  |

|                           |              |              |              |                           |              |              |              |
|---------------------------|--------------|--------------|--------------|---------------------------|--------------|--------------|--------------|
| N                         | 1.584649000  | 0.063462000  | 0.755940000  | O                         | 3.555082000  | -1.602023000 | 1.333739000  |
| C                         | 0.687426000  | -0.338679000 | 1.847475000  | C                         | 1.960760000  | -1.138076000 | -0.396049000 |
| H                         | 0.553615000  | -1.419939000 | 1.791492000  | H                         | 2.216559000  | -0.126476000 | -0.723180000 |
| H                         | 1.152222000  | -0.131797000 | 2.830903000  | H                         | 2.555413000  | -1.848224000 | -0.989097000 |
| C                         | 2.122099000  | 1.415379000  | 0.941568000  | N                         | 0.514210000  | -1.345987000 | -0.572501000 |
| H                         | 2.383767000  | 1.595803000  | 1.997056000  | C                         | 0.000000000  | -0.767385000 | -1.824668000 |
| H                         | 3.055318000  | 1.488374000  | 0.373619000  | H                         | 0.577896000  | -1.112040000 | -2.699879000 |
| C                         | 1.270073000  | 2.614002000  | 0.439376000  | H                         | -1.016699000 | -1.139083000 | -1.948173000 |
| O                         | 1.410406000  | 3.685197000  | 1.090896000  | C                         | 0.208589000  | -2.779574000 | -0.477918000 |
| O                         | 0.572081000  | 2.458263000  | -0.595398000 | H                         | 0.636114000  | -3.328503000 | -1.333106000 |
| C                         | -3.392351000 | 0.867571000  | -0.794682000 | H                         | 0.706659000  | -3.171324000 | 0.414829000  |
| O                         | -2.755060000 | 0.454011000  | -1.798094000 | C                         | -1.280419000 | -3.194699000 | -0.349128000 |
| O                         | -4.570305000 | 1.317340000  | -0.790264000 | O                         | -1.482529000 | -4.431780000 | -0.499230000 |
| C                         | -2.664759000 | 0.908553000  | 0.576825000  | O                         | -2.142124000 | -2.320902000 | -0.088587000 |
| H                         | -2.235036000 | 1.912879000  | 0.648008000  | Li                        | 0.000000000  | 0.000000000  | 1.057774000  |
| H                         | -3.426739000 | 0.835393000  | 1.370957000  |                           |              |              |              |
| N                         | -1.584650000 | -0.063469000 | 0.755938000  | EDTA Mg (II)              |              |              |              |
| C                         | -0.687427000 | 0.338656000  | 1.847480000  | $\Delta G = -1300.400923$ |              |              |              |
| H                         | -0.553616000 | 1.419917000  | 1.791512000  | C                         | -1.755553000 | 2.314459000  | 0.580830000  |
| H                         | -1.152224000 | 0.131761000  | 2.830904000  | O                         | -1.099980000 | 1.695484000  | 1.480550000  |
| C                         | -2.122109000 | -1.415384000 | 0.941552000  | O                         | -2.685615000 | 3.119171000  | 0.769079000  |
| H                         | -2.383795000 | -1.595812000 | 1.997035000  | C                         | -1.357747000 | 2.012630000  | -0.886441000 |
| H                         | -3.055321000 | -1.488371000 | 0.373588000  | H                         | -2.075329000 | 1.282241000  | -1.270135000 |
| C                         | -1.270083000 | -2.614008000 | 0.439366000  | H                         | -1.468997000 | 2.922932000  | -1.488963000 |
| O                         | -1.410417000 | -3.685202000 | 1.090887000  | N                         | 0.000000000  | 1.453738000  | -0.954677000 |
| O                         | -0.572087000 | -2.458271000 | -0.595406000 | C                         | 0.312027000  | 0.697577000  | -2.183435000 |
| K                         | 0.000000000  | -0.000005000 | -1.644625000 | H                         | -0.006856000 | 1.235818000  | -3.087413000 |
|                           |              |              |              | H                         | 1.399360000  | 0.610170000  | -2.240387000 |
|                           |              |              |              | C                         | 1.022975000  | 2.479707000  | -0.676605000 |
| EDTA Li (I)               |              |              |              | H                         | 1.480581000  | 2.856588000  | -1.597461000 |
| $\Delta G = -1107.883008$ |              |              |              | H                         | 0.552524000  | 3.338164000  | -0.190655000 |
| C                         | -2.395817000 | 1.201730000  | 1.087010000  | C                         | 2.124365000  | 1.997229000  | 0.287569000  |
| O                         | -1.548372000 | 0.785611000  | 1.937073000  | O                         | 3.172918000  | 2.666007000  | 0.341883000  |
| O                         | -3.555082000 | 1.602023000  | 1.333739000  | O                         | 1.854806000  | 0.966566000  | 0.983007000  |
| C                         | -1.960760000 | 1.138076000  | -0.396049000 | C                         | 1.755553000  | -2.314459000 | 0.580830000  |
| H                         | -2.216559000 | 0.126476000  | -0.723180000 | O                         | 1.099980000  | -1.695484000 | 1.480550000  |
| H                         | -2.555413000 | 1.848224000  | -0.989097000 | O                         | 2.685615000  | -3.119171000 | 0.769079000  |
| N                         | -0.514210000 | 1.345987000  | -0.572501000 | C                         | 1.357747000  | -2.012630000 | -0.886441000 |
| C                         | 0.000000000  | 0.767385000  | -1.824668000 | H                         | 2.075329000  | -1.282241000 | -1.270135000 |
| H                         | -0.577896000 | 1.112040000  | -2.699879000 | H                         | 1.468997000  | -2.922932000 | -1.488963000 |
| H                         | 1.016699000  | 1.139083000  | -1.948173000 | N                         | 0.000000000  | -1.453738000 | -0.954677000 |
| C                         | -0.208589000 | 2.779574000  | -0.477918000 | C                         | -0.312027000 | -0.697577000 | -2.183435000 |
| H                         | -0.636114000 | 3.328503000  | -1.333106000 | H                         | 0.006856000  | -1.235818000 | -3.087413000 |
| H                         | -0.706659000 | 3.171324000  | 0.414829000  | H                         | -1.399360000 | -0.610170000 | -2.240387000 |
| C                         | 1.280419000  | 3.194699000  | -0.349128000 | C                         | -1.022975000 | -2.479707000 | -0.676605000 |
| O                         | 1.482529000  | 4.431780000  | -0.499230000 | H                         | -1.480581000 | -2.856588000 | -1.597461000 |
| O                         | 2.142124000  | 2.320902000  | -0.088587000 | H                         | -0.552524000 | -3.338164000 | -0.190655000 |
| C                         | 2.395817000  | -1.201730000 | 1.087010000  | C                         | -2.124365000 | -1.997229000 | 0.287569000  |
| O                         | 1.548372000  | -0.785611000 | 1.937073000  |                           |              |              |              |

|                           |              |              |              |                           |              |              |              |
|---------------------------|--------------|--------------|--------------|---------------------------|--------------|--------------|--------------|
| O                         | -3.172918000 | -2.666007000 | 0.341883000  | N                         | 0.822430000  | 1.292283000  | -0.802749000 |
| O                         | -1.854806000 | -0.966566000 | 0.983007000  | C                         | 0.653203000  | 0.401595000  | -1.956676000 |
| Mg                        | 0.000000000  | 0.000000000  | 0.871684000  | H                         | 0.708493000  | 0.957754000  | -2.910725000 |
|                           |              |              |              | H                         | 1.500506000  | -0.288942000 | -1.962264000 |
| EDTA Mn (II)              |              |              |              | C                         | 2.229383000  | 1.633792000  | -0.593474000 |
| $\Delta G = -2251.190128$ |              |              |              | H                         | 2.740999000  | 1.865915000  | -1.540863000 |
| C                         | -1.529869000 | 2.357161000  | 0.919424000  | H                         | 2.277065000  | 2.541006000  | 0.016089000  |
| O                         | -0.884544000 | 1.576279000  | 1.707300000  | C                         | 3.060669000  | 0.579600000  | 0.181659000  |
| O                         | -2.269975000 | 3.293911000  | 1.232872000  | O                         | 4.301080000  | 0.589140000  | -0.042124000 |
| C                         | -1.340172000 | 2.056478000  | -0.603481000 | O                         | 2.453144000  | -0.154224000 | 1.004019000  |
| H                         | -2.109499000 | 1.332711000  | -0.880063000 | C                         | 0.223763000  | -3.167909000 | 0.538721000  |
| H                         | -1.464685000 | 2.979041000  | -1.185155000 | O                         | 0.000000000  | -2.491859000 | 1.576611000  |
| N                         | 0.000000000  | 1.454695000  | -0.804493000 | O                         | 0.636917000  | -4.357540000 | 0.492917000  |
| C                         | 0.255261000  | 0.723692000  | -2.073527000 | C                         | 0.021687000  | -2.483138000 | -0.841381000 |
| H                         | -0.180839000 | 1.256669000  | -2.933825000 | H                         | 1.021754000  | -2.204685000 | -1.185397000 |
| H                         | 1.337307000  | 0.720554000  | -2.210476000 | H                         | -0.352172000 | -3.238051000 | -1.553364000 |
| C                         | 1.056939000  | 2.478575000  | -0.610002000 | N                         | -0.822430000 | -1.292283000 | -0.802749000 |
| H                         | 1.138311000  | 3.121153000  | -1.497559000 | C                         | -0.653203000 | -0.401595000 | -1.956676000 |
| H                         | 0.770457000  | 3.107877000  | 0.234443000  | H                         | -0.708493000 | -0.957754000 | -2.910725000 |
| C                         | 2.433709000  | 1.846465000  | -0.273712000 | H                         | -1.500506000 | 0.288942000  | -1.962264000 |
| O                         | 3.438412000  | 2.536367000  | -0.533426000 | C                         | -2.229383000 | -1.633792000 | -0.593474000 |
| O                         | 2.365148000  | 0.698167000  | 0.245558000  | H                         | -2.740999000 | -1.865915000 | -1.540863000 |
| C                         | 1.529869000  | -2.357161000 | 0.919424000  | H                         | -2.277065000 | -2.541006000 | 0.016089000  |
| O                         | 0.884544000  | -1.576279000 | 1.707300000  | C                         | -3.060669000 | -0.579600000 | 0.181659000  |
| O                         | 2.269975000  | -3.293911000 | 1.232872000  | O                         | -4.301080000 | -0.589140000 | -0.042124000 |
| C                         | 1.340172000  | -2.056478000 | -0.603481000 | O                         | -2.453144000 | 0.154224000  | 1.004019000  |
| H                         | 2.109499000  | -1.332711000 | -0.880063000 | Na                        | 0.000000000  | 0.000000000  | 1.187508000  |
| H                         | 1.464685000  | -2.979041000 | -1.185155000 |                           |              |              |              |
| N                         | 0.000000000  | -1.454695000 | -0.804493000 | EDTA Ni (II)              |              |              |              |
| C                         | -0.255261000 | -0.723692000 | -2.073527000 | $\Delta G = -2608.484744$ |              |              |              |
| H                         | 0.180839000  | -1.256669000 | -2.933825000 | C                         | -0.926894000 | 2.415074000  | 1.336422000  |
| H                         | -1.337307000 | -0.720554000 | -2.210476000 | O                         | -0.313992000 | 1.417187000  | 1.895749000  |
| C                         | -1.056939000 | -2.478575000 | -0.610002000 | O                         | -1.400834000 | 3.376620000  | 1.940374000  |
| H                         | -1.138311000 | -3.121153000 | -1.497559000 | C                         | -1.067009000 | 2.304127000  | -0.190737000 |
| H                         | -0.770457000 | -3.107877000 | 0.234443000  | H                         | -2.035595000 | 1.847940000  | -0.396401000 |
| C                         | -2.433709000 | -1.846465000 | -0.273712000 | H                         | -1.014227000 | 3.287654000  | -0.664287000 |
| O                         | -3.438412000 | -2.536367000 | -0.533426000 | N                         | 0.000000000  | 1.385545000  | -0.688285000 |
| O                         | -2.365148000 | -0.698167000 | 0.245558000  | C                         | -0.321616000 | 0.694407000  | -1.981567000 |
| Mn                        | 0.000000000  | 0.000000000  | 0.698675000  | H                         | -1.403137000 | 0.613362000  | -2.049824000 |
|                           |              |              |              | H                         | 0.035970000  | 1.283365000  | -2.831103000 |
| EDTA Na (I)               |              |              |              | C                         | 1.276617000  | 2.169437000  | -0.777554000 |
| $\Delta G = -1262.648833$ |              |              |              | H                         | 1.205686000  | 2.828547000  | -1.646989000 |
| C                         | -0.223763000 | 3.167909000  | 0.538721000  | H                         | 1.329526000  | 2.803883000  | 0.110409000  |
| O                         | 0.000000000  | 2.491859000  | 1.576611000  | C                         | 2.626333000  | 1.405843000  | -0.819958000 |
| O                         | -0.636917000 | 4.357540000  | 0.492917000  | O                         | 3.539118000  | 2.003775000  | -1.439567000 |
| C                         | -0.021687000 | 2.483138000  | -0.841381000 | O                         | 2.710184000  | 0.322301000  | -0.192076000 |
| H                         | -1.021754000 | 2.204685000  | -1.185397000 | C                         | 0.926894000  | -2.415074000 | 1.336422000  |
| H                         | 0.352172000  | 3.238051000  | -1.553364000 | O                         | 0.313992000  | -1.417187000 | 1.895749000  |

|                           |              |              |              |                           |              |              |              |
|---------------------------|--------------|--------------|--------------|---------------------------|--------------|--------------|--------------|
| O                         | 1.400834000  | -3.376620000 | 1.940374000  | O                         | -4.128188000 | -0.510581000 | 0.167995000  |
| C                         | 1.067009000  | -2.304127000 | -0.190737000 | O                         | -2.116245000 | 0.241514000  | 0.822639000  |
| H                         | 2.035595000  | -1.847940000 | -0.396401000 | V                         | 0.000000000  | 0.000000000  | 0.750194000  |
| H                         | 1.014227000  | -3.287654000 | -0.664287000 |                           |              |              |              |
| N                         | 0.000000000  | -1.385545000 | -0.688285000 | EDTA V(III)               |              |              |              |
| C                         | 0.321616000  | -0.694407000 | -1.981567000 | $\Delta G = -2044.090265$ |              |              |              |
| H                         | 1.403137000  | -0.613362000 | -2.049824000 | C                         | -2.123270000 | 1.875022000  | -0.559059000 |
| H                         | -0.035970000 | -1.283365000 | -2.831103000 | O                         | -1.526600000 | 1.052757000  | -1.381704000 |
| C                         | -1.276617000 | -2.169437000 | -0.777554000 | O                         | -2.785718000 | 2.845401000  | -0.892407000 |
| H                         | -1.205686000 | -2.828547000 | -1.646989000 | C                         | -1.908404000 | 1.513491000  | 0.917295000  |
| H                         | -1.329526000 | -2.803883000 | 0.110409000  | H                         | -1.163456000 | 2.194352000  | 1.333105000  |
| C                         | -2.626333000 | -1.405843000 | -0.819958000 | H                         | -2.835458000 | 1.641681000  | 1.484051000  |
| O                         | -3.539118000 | -2.003775000 | -1.439567000 | N                         | -1.406455000 | 0.119688000  | 0.961690000  |
| O                         | -2.710184000 | -0.322301000 | -0.192076000 | C                         | -0.710177000 | -0.259332000 | 2.222718000  |
| Ni                        | 0.000000000  | 0.000000000  | 0.661480000  | H                         | -1.256200000 | 0.110764000  | 3.096386000  |
|                           |              |              |              | H                         | -0.714782000 | -1.348686000 | 2.278528000  |
| EDTA V(II)                |              |              |              | C                         | -2.530117000 | -0.834560000 | 0.713381000  |
| $\Delta G = -2044.230718$ |              |              |              | H                         | -2.950662000 | -1.194153000 | 1.654622000  |
| C                         | -0.233302000 | 2.936012000  | 0.580076000  | H                         | -3.329332000 | -0.319158000 | 0.177897000  |
| O                         | 0.000000000  | 2.051859000  | 1.472105000  | C                         | -2.087831000 | -2.001354000 | -0.172068000 |
| O                         | -0.576529000 | 4.112550000  | 0.785175000  | O                         | -2.747877000 | -3.041548000 | -0.188353000 |
| C                         | -0.086465000 | 2.467593000  | -0.889955000 | O                         | -1.050752000 | -1.755147000 | -0.892540000 |
| H                         | -1.086657000 | 2.230058000  | -1.260742000 | C                         | 2.123263000  | -1.875028000 | -0.559058000 |
| H                         | 0.310923000  | 3.284403000  | -1.504158000 | O                         | 1.526589000  | -1.052763000 | -1.381704000 |
| N                         | 0.758196000  | 1.259752000  | -0.945233000 | O                         | 2.785705000  | -2.845409000 | -0.892407000 |
| C                         | 0.627289000  | 0.434189000  | -2.173514000 | C                         | 1.908408000  | -1.513489000 | 0.917297000  |
| H                         | 0.636603000  | 1.057688000  | -3.077441000 | H                         | 1.163460000  | -2.194346000 | 1.333112000  |
| H                         | 1.512249000  | -0.203630000 | -2.222296000 | H                         | 2.835466000  | -1.641681000 | 1.484046000  |
| C                         | 2.179971000  | 1.594251000  | -0.698201000 | N                         | 1.406465000  | -0.119685000 | 0.961689000  |
| H                         | 2.726230000  | 1.755128000  | -1.633515000 | C                         | 0.710191000  | 0.259347000  | 2.222714000  |
| H                         | 2.234730000  | 2.527268000  | -0.133280000 | H                         | 1.256214000  | -0.110740000 | 3.096386000  |
| C                         | 2.885784000  | 0.527470000  | 0.154515000  | H                         | 0.714797000  | 1.348702000  | 2.278514000  |
| O                         | 4.128188000  | 0.510581000  | 0.167995000  | C                         | 2.530126000  | 0.834560000  | 0.713367000  |
| O                         | 2.116245000  | -0.241514000 | 0.822639000  | H                         | 2.950685000  | 1.194150000  | 1.654603000  |
| C                         | 0.233302000  | -2.936012000 | 0.580076000  | H                         | 3.329332000  | 0.319155000  | 0.177872000  |
| O                         | 0.000000000  | -2.051859000 | 1.472105000  | C                         | 2.087831000  | 2.001354000  | -0.172077000 |
| O                         | 0.576529000  | -4.112550000 | 0.785175000  | O                         | 2.747870000  | 3.041552000  | -0.188361000 |
| C                         | 0.086465000  | -2.467593000 | -0.889955000 | O                         | 1.050752000  | 1.755142000  | -0.892547000 |
| H                         | 1.086657000  | -2.230058000 | -1.260742000 | V                         | -0.000001000 | 0.000000000  | -0.752158000 |
| H                         | -0.310923000 | -3.284403000 | -1.504158000 |                           |              |              |              |
| N                         | -0.758196000 | -1.259752000 | -0.945233000 | EDTA Zn(II)               |              |              |              |
| C                         | -0.627289000 | -0.434189000 | -2.173514000 | $\Delta G = -2879.561167$ |              |              |              |
| H                         | -0.636603000 | -1.057688000 | -3.077441000 | C                         | 2.884977000  | -0.982581000 | 1.085463000  |
| H                         | -1.512249000 | 0.203630000  | -2.222296000 | O                         | 2.239743000  | -1.506826000 | 0.115758000  |
| C                         | -2.179971000 | -1.594251000 | -0.698201000 | O                         | 3.916429000  | -1.412205000 | 1.613972000  |
| H                         | -2.726230000 | -1.755128000 | -1.633515000 | C                         | 2.267589000  | 0.302767000  | 1.703836000  |
| H                         | -2.234730000 | -2.527268000 | -0.133280000 | H                         | 1.720511000  | -0.029356000 | 2.591294000  |
| C                         | -2.885784000 | -0.527470000 | 0.154515000  | H                         | 3.081740000  | 0.948082000  | 2.057587000  |

|                           |              |              |              |    |              |              |              |
|---------------------------|--------------|--------------|--------------|----|--------------|--------------|--------------|
| N                         | 1.348600000  | 1.014303000  | 0.809548000  | H  | 0.879533000  | 1.912597000  | 1.086058000  |
| C                         | 0.138623000  | 1.530880000  | 1.472195000  | H  | -1.138599000 | 2.423262000  | -0.241590000 |
| H                         | 0.384353000  | 2.027430000  | 2.425277000  | H  | -2.175794000 | 1.785144000  | 1.013468000  |
| H                         | -0.314870000 | 2.286280000  | 0.829122000  | H  | 1.788141000  | -0.405331000 | 1.641051000  |
| C                         | 2.020788000  | 1.975114000  | -0.078842000 | H  | 1.812485000  | -0.009135000 | -1.401907000 |
| H                         | 1.842893000  | 3.009979000  | 0.236298000  | H  | 2.375336000  | 1.194401000  | -0.264641000 |
| H                         | 3.100616000  | 1.809561000  | -0.023646000 | H  | 1.259703000  | -1.566981000 | 0.436739000  |
| C                         | 1.669598000  | 1.872000000  | -1.592071000 | H  | -1.830510000 | -1.519206000 | -0.657778000 |
| O                         | 2.050610000  | 2.806863000  | -2.299740000 | H  | -0.572603000 | -2.577745000 | -0.049909000 |
| O                         | 1.059714000  | 0.816058000  | -1.986227000 | H  | -0.617136000 | -1.278988000 | 2.149424000  |
| C                         | -3.502757000 | 1.078583000  | 0.444777000  | H  | -1.894231000 | -0.281027000 | 1.475814000  |
| O                         | -4.577610000 | 1.385861000  | -0.293160000 |    |              |              |              |
| O                         | -3.390383000 | 2.104674000  | 1.300242000  |    |              |              |              |
| C                         | -2.258216000 | 0.634935000  | -0.315108000 |    |              |              |              |
| H                         | -2.563543000 | 0.057459000  | -1.189905000 |    |              |              |              |
| H                         | -1.707764000 | 1.514280000  | -0.687253000 |    |              |              |              |
| N                         | -1.291935000 | -0.222235000 | 0.460963000  |    |              |              |              |
| C                         | -0.883159000 | 0.418171000  | 1.729799000  |    |              |              |              |
| H                         | -1.744066000 | 0.835166000  | 2.262360000  |    |              |              |              |
| H                         | -0.431768000 | -0.354099000 | 2.360574000  |    |              |              |              |
| C                         | -1.831522000 | -1.589728000 | 0.617517000  |    |              |              |              |
| H                         | -1.382243000 | -2.053913000 | 1.501745000  |    |              |              |              |
| H                         | -2.914616000 | -1.571256000 | 0.766915000  |    |              |              |              |
| C                         | -1.489974000 | -2.520128000 | -0.580133000 |    |              |              |              |
| O                         | -2.161176000 | -3.546182000 | -0.705294000 |    |              |              |              |
| O                         | -0.503073000 | -2.162668000 | -1.323004000 |    |              |              |              |
| Zn                        | 0.578747000  | -0.607626000 | -0.677630000 |    |              |              |              |
| NTP                       |              |              |              |    |              |              |              |
| $\Delta G = -856.858734$  |              |              |              |    |              |              |              |
| O                         | -2.385782000 | 4.270424000  | 1.428849000  |    |              |              |              |
| O                         | 3.854655000  | -1.661436000 | -0.033913000 |    |              |              |              |
| O                         | -3.339688000 | -2.438816000 | 1.644167000  |    |              |              |              |
| C                         | -1.003363000 | -0.847586000 | 1.206990000  |    |              |              |              |
| C                         | -1.426350000 | -1.970025000 | 0.257806000  |    |              |              |              |
| C                         | -2.514987000 | -2.915577000 | 0.817777000  |    |              |              |              |
| C                         | 1.337363000  | -0.498428000 | 0.635845000  |    |              |              |              |
| C                         | 3.685357000  | -0.496032000 | -0.483871000 |    |              |              |              |
| C                         | -0.052164000 | 1.388585000  | 1.297924000  |    |              |              |              |
| C                         | -1.213245000 | 2.273523000  | 0.842936000  |    |              |              |              |
| C                         | -1.271673000 | 3.677416000  | 1.489085000  |    |              |              |              |
| N                         | -0.018110000 | 0.078407000  | 0.623616000  |    |              |              |              |
| O                         | 4.572219000  | 0.221787000  | -1.026547000 |    |              |              |              |
| O                         | -0.215492000 | 4.142522000  | 1.996507000  |    |              |              |              |
| O                         | -2.513992000 | -4.098309000 | 0.374255000  |    |              |              |              |
| C                         | 2.267018000  | 0.116926000  | -0.411075000 |    |              |              |              |
| H                         | -0.086337000 | 1.257151000  | 2.394905000  |    |              |              |              |
| NTP Al (III)              |              |              |              |    |              |              |              |
| $\Delta G = -1099.072397$ |              |              |              |    |              |              |              |
| H                         | -2.563543000 | 0.057459000  | -1.189905000 | Al | 0.122183000  | -0.185893000 | -0.894401000 |
| H                         | -1.707764000 | 1.514280000  | -0.687253000 | O  | -0.411880000 | 1.417531000  | -1.383907000 |
| N                         | -1.291935000 | -0.222235000 | 0.460963000  | O  | 1.781233000  | -0.554987000 | -1.332485000 |
| C                         | -0.883159000 | 0.418171000  | 1.729799000  | O  | -1.005148000 | -1.486647000 | -1.257385000 |
| H                         | -1.744066000 | 0.835166000  | 2.262360000  | C  | -0.970821000 | -0.965043000 | 1.656453000  |
| H                         | -0.431768000 | -0.354099000 | 2.360574000  | C  | -2.234383000 | -1.167455000 | 0.805046000  |
| C                         | -1.831522000 | -1.589728000 | 0.617517000  | C  | -2.034729000 | -1.898475000 | -0.520117000 |
| H                         | -1.382243000 | -2.053913000 | 1.501745000  | C  | 1.467233000  | -0.607801000 | 1.574675000  |
| H                         | -2.914616000 | -1.571256000 | 0.766915000  | C  | 2.890120000  | -0.486400000 | -0.599622000 |
| C                         | -1.489974000 | -2.520128000 | -0.580133000 | C  | -0.022189000 | 1.359451000  | 1.510696000  |
| O                         | -2.161176000 | -3.546182000 | -0.705294000 | C  | -1.110873000 | 2.181628000  | 0.812752000  |
| O                         | -0.503073000 | -2.162668000 | -1.323004000 | C  | -0.931866000 | 2.421820000  | -0.684742000 |
| Zn                        | 0.578747000  | -0.607626000 | -0.677630000 | N  | 0.128113000  | -0.084945000 | 1.070245000  |
|                           |              |              |              | O  | 3.982851000  | -0.716690000 | -1.070981000 |
|                           |              |              |              | O  | -1.271879000 | 3.459923000  | -1.211012000 |
|                           |              |              |              | O  | -2.776063000 | -2.782315000 | -0.892130000 |
|                           |              |              |              | C  | 2.711339000  | -0.069637000 | 0.858170000  |
|                           |              |              |              | H  | -0.205812000 | 1.355889000  | 2.587057000  |
|                           |              |              |              | H  | 0.938226000  | 1.846722000  | 1.348914000  |
|                           |              |              |              | H  | -2.103056000 | 1.747206000  | 0.961240000  |
|                           |              |              |              | H  | -1.139394000 | 3.157273000  | 1.299564000  |
|                           |              |              |              | H  | 1.534247000  | -0.375660000 | 2.640126000  |
|                           |              |              |              | H  | 2.763519000  | 1.023182000  | 0.892486000  |
|                           |              |              |              | H  | 3.581845000  | -0.424489000 | 1.411088000  |
|                           |              |              |              | H  | 1.440003000  | -1.692620000 | 1.475518000  |
|                           |              |              |              | H  | -2.931720000 | -1.751837000 | 1.406063000  |
|                           |              |              |              | H  | -2.740768000 | -0.223100000 | 0.588003000  |
|                           |              |              |              | H  | -0.525023000 | -1.941084000 | 1.842052000  |
|                           |              |              |              | H  | -1.251888000 | -0.546783000 | 2.624190000  |
| NTP Be (II)               |              |              |              |    |              |              |              |
| $\Delta G = -871.529719$  |              |              |              |    |              |              |              |
|                           |              |              |              | Be | 0.118668000  | -0.174950000 | -0.717336000 |
|                           |              |              |              | O  | -0.584340000 | 1.167640000  | -1.283168000 |

|                          |              |              |              |                           |              |              |              |
|--------------------------|--------------|--------------|--------------|---------------------------|--------------|--------------|--------------|
| O                        | 1.627064000  | -0.297429000 | -1.253679000 | H                         | 1.167705000  | 1.795433000  | 1.103064000  |
| O                        | -0.708496000 | -1.499922000 | -1.120608000 | H                         | -1.872944000 | 2.041671000  | 1.373853000  |
| C                        | -1.046827000 | -0.798575000 | 1.668233000  | H                         | -0.714502000 | 3.316966000  | 1.086807000  |
| C                        | -2.204833000 | -1.070368000 | 0.698468000  | H                         | 1.352980000  | -0.728214000 | 2.614131000  |
| C                        | -1.795453000 | -1.885856000 | -0.527684000 | H                         | 2.972269000  | 0.598645000  | 1.343358000  |
| C                        | 1.392720000  | -0.725703000 | 1.555099000  | H                         | 3.397129000  | -1.079755000 | 1.134461000  |
| C                        | 2.749068000  | -0.290905000 | -0.610595000 | H                         | 1.129164000  | -1.848393000 | 1.266835000  |
| C                        | 0.121119000  | 1.374755000  | 1.461956000  | H                         | -2.912419000 | -1.769045000 | 1.143494000  |
| C                        | -1.033902000 | 2.175580000  | 0.864587000  | H                         | -2.719479000 | -0.297654000 | 0.203598000  |
| C                        | -1.106995000 | 2.177162000  | -0.665329000 | H                         | -0.793456000 | -1.538145000 | 2.236130000  |
| N                        | 0.131146000  | -0.069673000 | 1.070756000  | H                         | -1.580958000 | 0.021626000  | 2.364722000  |
| O                        | 3.849549000  | -0.324359000 | -1.165213000 |                           |              |              |              |
| O                        | -1.670232000 | 3.109661000  | -1.242507000 | NTP Ca(II)                |              |              |              |
| O                        | -2.477647000 | -2.838903000 | -0.907653000 | $\Delta G = -1534.405089$ |              |              |              |
| C                        | 2.680942000  | -0.208390000 | 0.916243000  | Ca                        | 0.188943000  | -0.293071000 | -1.537647000 |
| H                        | 0.100682000  | 1.448770000  | 2.555469000  | O                         | -0.799160000 | 1.738000000  | -1.320203000 |
| H                        | 1.058449000  | 1.815178000  | 1.123338000  | O                         | 2.395905000  | -0.612004000 | -1.144740000 |
| H                        | -1.999255000 | 1.825644000  | 1.243674000  | O                         | -1.271631000 | -1.966682000 | -1.045634000 |
| H                        | -0.943661000 | 3.210970000  | 1.198553000  | C                         | -0.995974000 | -0.722849000 | 1.700645000  |
| H                        | 1.454971000  | -0.621790000 | 2.644745000  | C                         | -2.272446000 | -0.905675000 | 0.856020000  |
| H                        | 2.885199000  | 0.829383000  | 1.196674000  | C                         | -2.184863000 | -2.062869000 | -0.151772000 |
| H                        | 3.512357000  | -0.789308000 | 1.320854000  | C                         | 1.401830000  | -0.699092000 | 1.586659000  |
| H                        | 1.292096000  | -1.789410000 | 1.332970000  | C                         | 3.255906000  | -0.290074000 | -0.256210000 |
| H                        | -2.984510000 | -1.609180000 | 1.238846000  | C                         | 0.195047000  | 1.405806000  | 1.375635000  |
| H                        | -2.650596000 | -0.137292000 | 0.342601000  | C                         | -1.044208000 | 2.236941000  | 1.033871000  |
| H                        | -0.684752000 | -1.755908000 | 2.044377000  | C                         | -1.392460000 | 2.460764000  | -0.448993000 |
| H                        | -1.409111000 | -0.238056000 | 2.533885000  | N                         | 0.166408000  | -0.046507000 | 1.047574000  |
|                          |              |              |              | O                         | 4.463993000  | -0.087423000 | -0.476940000 |
|                          |              |              |              | O                         | -2.242467000 | 3.332099000  | -0.708270000 |
|                          |              |              |              | O                         | -2.981124000 | -3.013711000 | -0.052067000 |
|                          |              |              |              | C                         | 2.769327000  | -0.131057000 | 1.194179000  |
|                          |              |              |              | H                         | 0.381739000  | 1.519113000  | 2.456385000  |
|                          |              |              |              | H                         | 1.049185000  | 1.845883000  | 0.859176000  |
|                          |              |              |              | H                         | -1.939349000 | 1.848035000  | 1.527810000  |
|                          |              |              |              | H                         | -0.891538000 | 3.228047000  | 1.471692000  |
|                          |              |              |              | H                         | 1.351948000  | -0.678079000 | 2.687255000  |
|                          |              |              |              | H                         | 2.858006000  | 0.927834000  | 1.453366000  |
|                          |              |              |              | H                         | 3.507028000  | -0.634756000 | 1.826145000  |
|                          |              |              |              | H                         | 1.357905000  | -1.749153000 | 1.287687000  |
|                          |              |              |              | H                         | -3.099197000 | -1.106480000 | 1.540478000  |
|                          |              |              |              | H                         | -2.518719000 | 0.009433000  | 0.312090000  |
|                          |              |              |              | H                         | -0.666252000 | -1.714224000 | 2.018551000  |
|                          |              |              |              | H                         | -1.251577000 | -0.182275000 | 2.621915000  |
|                          |              |              |              |                           |              |              |              |
|                          |              |              |              | NTP Co(II)                |              |              |              |
|                          |              |              |              | $\Delta G = -2239.423535$ |              |              |              |
|                          |              |              |              | Co                        | 0.133854000  | -0.276550000 | -0.944932000 |
|                          |              |              |              | O                         | -0.546707000 | 1.637212000  | -1.116555000 |
|                          |              |              |              |                           |              |              |              |
| NTP B(III)               |              |              |              |                           |              |              |              |
| $\Delta G = -881.410107$ |              |              |              |                           |              |              |              |
| B                        | 0.070017000  | -0.111478000 | -0.570820000 |                           |              |              |              |
| O                        | -0.813407000 | 0.912263000  | -1.127370000 |                           |              |              |              |
| O                        | 1.395077000  | 0.084144000  | -1.142987000 |                           |              |              |              |
| O                        | -0.406500000 | -1.434507000 | -0.963549000 |                           |              |              |              |
| C                        | -1.139258000 | -0.681278000 | 1.662048000  |                           |              |              |              |
| C                        | -2.178932000 | -1.142897000 | 0.636939000  |                           |              |              |              |
| C                        | -1.561801000 | -1.931236000 | -0.500073000 |                           |              |              |              |
| C                        | 1.315592000  | -0.807270000 | 1.527181000  |                           |              |              |              |
| C                        | 2.590013000  | -0.145983000 | -0.595523000 |                           |              |              |              |
| C                        | 0.211101000  | 1.420170000  | 1.460810000  |                           |              |              |              |
| C                        | -0.918552000 | 2.265271000  | 0.886111000  |                           |              |              |              |
| C                        | -1.144743000 | 2.096038000  | -0.603963000 |                           |              |              |              |
| N                        | 0.103788000  | -0.029452000 | 1.046022000  |                           |              |              |              |
| O                        | 3.593425000  | -0.126910000 | -1.272910000 |                           |              |              |              |
| O                        | -1.671548000 | 2.946947000  | -1.284698000 |                           |              |              |              |
| O                        | -2.040060000 | -2.939350000 | -0.967430000 |                           |              |              |              |
| C                        | 2.626027000  | -0.342532000 | 0.906823000  |                           |              |              |              |
| H                        | 0.217689000  | 1.463688000  | 2.550491000  |                           |              |              |              |



|   |              |              |              |                           |              |              |              |
|---|--------------|--------------|--------------|---------------------------|--------------|--------------|--------------|
| O | 2.022653000  | -0.033422000 | -1.206869000 | H                         | 1.512348000  | 1.072469000  | 1.320982000  |
| O | -1.523364000 | -1.197678000 | -1.253446000 | H                         | -1.405250000 | 1.749563000  | 1.928859000  |
| C | -0.999901000 | -1.044523000 | 1.671802000  | H                         | -0.017793000 | 2.791741000  | 1.987327000  |
| C | -2.350679000 | -0.839465000 | 0.973448000  | H                         | 1.283446000  | -1.849828000 | 2.215524000  |
| C | -2.471932000 | -1.462754000 | -0.417610000 | H                         | 3.094157000  | -0.350986000 | 1.620814000  |
| C | 1.398680000  | -1.202570000 | 1.437235000  | H                         | 3.379451000  | -1.888853000 | 0.863030000  |
| C | 3.028834000  | -0.313876000 | -0.446064000 | H                         | 1.064939000  | -2.390988000 | 0.557824000  |
| C | 0.385921000  | 1.022421000  | 1.590030000  | H                         | -3.190802000 | -1.209546000 | 1.570640000  |
| C | -0.700957000 | 2.051537000  | 1.278900000  | H                         | -2.584796000 | 0.349281000  | 1.075715000  |
| C | -0.958955000 | 2.424934000  | -0.194245000 | H                         | -0.960959000 | -2.236868000 | 1.409347000  |
| N | 0.200618000  | -0.371690000 | 1.070813000  | H                         | -1.049862000 | -0.975942000 | 2.632954000  |
| O | 4.200401000  | -0.268506000 | -0.836065000 |                           |              |              |              |
| O | -1.570466000 | 3.486092000  | -0.407274000 | NTP Cr(II)                |              |              |              |
| O | -3.457009000 | -2.153067000 | -0.702513000 | $\Delta G = -1901.138845$ |              |              |              |
| C | 2.769813000  | -0.664844000 | 1.024959000  | Cr                        | 0.121480000  | -0.286493000 | -1.082600000 |
| H | 0.510603000  | 0.963477000  | 2.679339000  | O                         | -0.458638000 | 1.709706000  | -1.096503000 |
| H | 1.321610000  | 1.392178000  | 1.175028000  | O                         | 2.095015000  | -0.060904000 | -1.223796000 |
| H | -1.658126000 | 1.784226000  | 1.732661000  | O                         | -1.654619000 | -1.142190000 | -1.290702000 |
| H | -0.401003000 | 2.973901000  | 1.783922000  | C                         | -1.005439000 | -1.093785000 | 1.625844000  |
| H | 1.403853000  | -1.344605000 | 2.525706000  | C                         | -2.375008000 | -0.828967000 | 0.979867000  |
| H | 3.037577000  | 0.221899000  | 1.607204000  | C                         | -2.577616000 | -1.401214000 | -0.425063000 |
| H | 3.504363000  | -1.422786000 | 1.307218000  | C                         | 1.386115000  | -1.272927000 | 1.386499000  |
| H | 1.240198000  | -2.183276000 | 0.984311000  | C                         | 3.078171000  | -0.352965000 | -0.442938000 |
| H | -3.115197000 | -1.284307000 | 1.613061000  | C                         | 0.405775000  | 0.955299000  | 1.599457000  |
| H | -2.600345000 | 0.218239000  | 0.876954000  | C                         | -0.651500000 | 2.022319000  | 1.312167000  |
| H | -0.788126000 | -2.115018000 | 1.686062000  | C                         | -0.882337000 | 2.460292000  | -0.147943000 |
| H | -1.082806000 | -0.725462000 | 2.717053000  | N                         | 0.198863000  | -0.417347000 | 1.036760000  |
|   |              |              |              | O                         | 4.265313000  | -0.296552000 | -0.788741000 |
|   |              |              |              | O                         | -1.481337000 | 3.535141000  | -0.324758000 |
|   |              |              |              | O                         | -3.600349000 | -2.045633000 | -0.686000000 |
|   |              |              |              | C                         | 2.774230000  | -0.744655000 | 1.011598000  |
|   |              |              |              | H                         | 0.520894000  | 0.865472000  | 2.688905000  |
|   |              |              |              | H                         | 1.353150000  | 1.318539000  | 1.204912000  |
|   |              |              |              | H                         | -1.621108000 | 1.766324000  | 1.744978000  |
|   |              |              |              | H                         | -0.334376000 | 2.918272000  | 1.853647000  |
|   |              |              |              | H                         | 1.381987000  | -1.451592000 | 2.470693000  |
|   |              |              |              | H                         | 3.045555000  | 0.117761000  | 1.627886000  |
|   |              |              |              | H                         | 3.488987000  | -1.524246000 | 1.287140000  |
|   |              |              |              | H                         | 1.221675000  | -2.237955000 | 0.902424000  |
|   |              |              |              | H                         | -3.127383000 | -1.271434000 | 1.635686000  |
|   |              |              |              | H                         | -2.597249000 | 0.237939000  | 0.927512000  |
|   |              |              |              | H                         | -0.817305000 | -2.168120000 | 1.579055000  |
|   |              |              |              | H                         | -1.059818000 | -0.830620000 | 2.689300000  |
|   |              |              |              |                           |              |              |              |
|   |              |              |              | NTP Cr(III)               |              |              |              |
|   |              |              |              | $\Delta G = -1901.030028$ |              |              |              |
|   |              |              |              | Cr                        | 0.083660000  | -0.253277000 | -1.035576000 |
|   |              |              |              | O                         | -0.427837000 | 1.546705000  | -0.969278000 |

|                           |              |              |              |                           |              |              |              |
|---------------------------|--------------|--------------|--------------|---------------------------|--------------|--------------|--------------|
| O                         | 1.981465000  | 0.009005000  | -1.184346000 | H                         | 1.145823000  | 1.627301000  | 1.115345000  |
| O                         | -1.661344000 | -0.987828000 | -1.286550000 | H                         | -1.867005000 | 1.772045000  | 1.631044000  |
| C                         | -1.041004000 | -1.178134000 | 1.555575000  | H                         | -0.728975000 | 3.074437000  | 1.611529000  |
| C                         | -2.412623000 | -0.797872000 | 0.990276000  | H                         | 1.495496000  | -0.943575000 | 2.683397000  |
| C                         | -2.660708000 | -1.187030000 | -0.463378000 | H                         | 2.949333000  | 0.667599000  | 1.500145000  |
| C                         | 1.352195000  | -1.443769000 | 1.240127000  | H                         | 3.584469000  | -0.949432000 | 1.504264000  |
| C                         | 3.017885000  | -0.362087000 | -0.478138000 | H                         | 1.385396000  | -1.962955000 | 1.249448000  |
| C                         | 0.474892000  | 0.823963000  | 1.659498000  | H                         | -3.035861000 | -1.421583000 | 1.604543000  |
| C                         | -0.521411000 | 1.953887000  | 1.427344000  | H                         | -2.614107000 | 0.063643000  | 0.776314000  |
| C                         | -0.712456000 | 2.407737000  | -0.016851000 | H                         | -0.649750000 | -2.013450000 | 1.880360000  |
| N                         | 0.190688000  | -0.495943000 | 0.986800000  | H                         | -1.136830000 | -0.574624000 | 2.760304000  |
| O                         | 4.167797000  | -0.236136000 | -0.875876000 |                           |              |              |              |
| O                         | -1.129302000 | 3.526293000  | -0.270410000 | NTP Fe(II)                |              |              |              |
| O                         | -3.738490000 | -1.634942000 | -0.826517000 | $\Delta G = -2120.369928$ |              |              |              |
| C                         | 2.753897000  | -0.929803000 | 0.917472000  | Fe                        | 0.139783000  | -0.236832000 | -0.915757000 |
| H                         | 0.557782000  | 0.628259000  | 2.732734000  | O                         | -0.642763000 | 1.597003000  | -1.247352000 |
| H                         | 1.449524000  | 1.156747000  | 1.311365000  | O                         | 2.079364000  | -0.326023000 | -1.216684000 |
| H                         | -1.505139000 | 1.736824000  | 1.847893000  | O                         | -1.265793000 | -1.601464000 | -1.122739000 |
| H                         | -0.156217000 | 2.818955000  | 1.985154000  | C                         | -0.999256000 | -0.831396000 | 1.721917000  |
| H                         | 1.317664000  | -1.723659000 | 2.297169000  | C                         | -2.304697000 | -0.900537000 | 0.920543000  |
| H                         | 3.078911000  | -0.172870000 | 1.635995000  | C                         | -2.246535000 | -1.811329000 | -0.308664000 |
| H                         | 3.436938000  | -1.770613000 | 1.058514000  | C                         | 1.413223000  | -0.870087000 | 1.552396000  |
| H                         | 1.142354000  | -2.347710000 | 0.664434000  | C                         | 3.075508000  | -0.325298000 | -0.397169000 |
| H                         | -3.158332000 | -1.304903000 | 1.604777000  | C                         | 0.262092000  | 1.295180000  | 1.471080000  |
| H                         | -2.621581000 | 0.269120000  | 1.080948000  | C                         | -0.918214000 | 2.185156000  | 1.089852000  |
| H                         | -0.894385000 | -2.247872000 | 1.405763000  | C                         | -1.177231000 | 2.413304000  | -0.409067000 |
| H                         | -1.032498000 | -0.998167000 | 2.633751000  | N                         | 0.179707000  | -0.149542000 | 1.066489000  |
|                           |              |              |              | O                         | 4.257901000  | -0.301224000 | -0.757141000 |
|                           |              |              |              | O                         | -1.895478000 | 3.369596000  | -0.732525000 |
|                           |              |              |              | O                         | -3.119583000 | -2.667781000 | -0.488211000 |
|                           |              |              |              | C                         | 2.766978000  | -0.323360000 | 1.104092000  |
|                           |              |              |              | H                         | 0.399644000  | 1.333795000  | 2.558653000  |
|                           |              |              |              | H                         | 1.161307000  | 1.705015000  | 1.013454000  |
|                           |              |              |              | H                         | -1.850668000 | 1.843419000  | 1.546931000  |
|                           |              |              |              | H                         | -0.730141000 | 3.167185000  | 1.531925000  |
|                           |              |              |              | H                         | 1.390153000  | -0.876482000 | 2.648818000  |
|                           |              |              |              | H                         | 2.934477000  | 0.693819000  | 1.469733000  |
|                           |              |              |              | H                         | 3.531758000  | -0.931658000 | 1.593193000  |
|                           |              |              |              | H                         | 1.312740000  | -1.904571000 | 1.218859000  |
|                           |              |              |              | H                         | -3.078396000 | -1.275218000 | 1.593327000  |
|                           |              |              |              | H                         | -2.628233000 | 0.087722000  | 0.586459000  |
|                           |              |              |              | H                         | -0.690243000 | -1.852169000 | 1.949910000  |
|                           |              |              |              | H                         | -1.185111000 | -0.337087000 | 2.680346000  |
|                           |              |              |              |                           |              |              |              |
|                           |              |              |              | NTP Fe(III)               |              |              |              |
|                           |              |              |              | $\Delta G = -2120.186371$ |              |              |              |
|                           |              |              |              | Fe                        | 0.074797000  | -0.219388000 | -0.903351000 |
|                           |              |              |              | O                         | -0.408047000 | 1.541614000  | -1.040971000 |
|                           |              |              |              |                           |              |              |              |
| NTP Cu(II)                |              |              |              |                           |              |              |              |
| $\Delta G = -2497.136548$ |              |              |              |                           |              |              |              |
| Cu                        | 0.174503000  | -0.268772000 | -0.885018000 |                           |              |              |              |
| O                         | -0.571261000 | 1.675956000  | -1.207919000 |                           |              |              |              |
| O                         | 2.031598000  | -0.054157000 | -1.214781000 |                           |              |              |              |
| O                         | -1.342626000 | -1.357823000 | -1.211962000 |                           |              |              |              |
| C                         | -0.958552000 | -0.974581000 | 1.755840000  |                           |              |              |              |
| C                         | -2.278824000 | -0.956269000 | 0.971183000  |                           |              |              |              |
| C                         | -2.267729000 | -1.694875000 | -0.368297000 |                           |              |              |              |
| C                         | 1.466251000  | -0.927948000 | 1.586116000  |                           |              |              |              |
| C                         | 3.040816000  | -0.231766000 | -0.421853000 |                           |              |              |              |
| C                         | 0.245571000  | 1.205027000  | 1.557470000  |                           |              |              |              |
| C                         | -0.933860000 | 2.096499000  | 1.165411000  |                           |              |              |              |
| C                         | -1.204839000 | 2.359452000  | -0.333792000 |                           |              |              |              |
| N                         | 0.202475000  | -0.239844000 | 1.158855000  |                           |              |              |              |
| O                         | 4.205284000  | -0.270245000 | -0.825687000 |                           |              |              |              |
| O                         | -2.035162000 | 3.248991000  | -0.595115000 |                           |              |              |              |
| O                         | -3.129969000 | -2.538583000 | -0.621035000 |                           |              |              |              |
| C                         | 2.785305000  | -0.332597000 | 1.088019000  |                           |              |              |              |
| H                         | 0.366336000  | 1.243129000  | 2.648242000  |                           |              |              |              |

|                           |              |              |              |                           |              |              |              |
|---------------------------|--------------|--------------|--------------|---------------------------|--------------|--------------|--------------|
| O                         | 1.899372000  | -0.100500000 | -1.192728000 | H                         | 0.874579000  | 1.869742000  | 0.940341000  |
| O                         | -1.549276000 | -1.013213000 | -1.272334000 | H                         | -2.135135000 | 1.628721000  | 1.412065000  |
| C                         | -1.092628000 | -1.033345000 | 1.637272000  | H                         | -1.218013000 | 3.075712000  | 1.699457000  |
| C                         | -2.427237000 | -0.737377000 | 0.950128000  | H                         | 1.315857000  | -0.729008000 | 2.678338000  |
| C                         | -2.547365000 | -1.294795000 | -0.460663000 | H                         | 2.712248000  | 1.042149000  | 1.439046000  |
| C                         | 1.297283000  | -1.366279000 | 1.345808000  | H                         | 3.444698000  | -0.464737000 | 1.882076000  |
| C                         | 2.941033000  | -0.449962000 | -0.466524000 | H                         | 1.359865000  | -1.703383000 | 1.198914000  |
| C                         | 0.456844000  | 0.936571000  | 1.649410000  | H                         | -3.115945000 | -1.270465000 | 1.260531000  |
| C                         | -0.540984000 | 2.046815000  | 1.347328000  | H                         | -2.401616000 | -0.210036000 | 0.036226000  |
| C                         | -0.691808000 | 2.442588000  | -0.117078000 | H                         | -0.693891000 | -1.791853000 | 1.981788000  |
| N                         | 0.159434000  | -0.411175000 | 1.045593000  | H                         | -1.428284000 | -0.299795000 | 2.540671000  |
| O                         | 4.075790000  | -0.391944000 | -0.910930000 |                           |              |              |              |
| O                         | -1.080767000 | 3.553392000  | -0.432018000 | NTP Li (I)                |              |              |              |
| O                         | -3.519850000 | -1.931404000 | -0.829763000 | $\Delta G = -864.376645$  |              |              |              |
| C                         | 2.698207000  | -0.896137000 | 0.971881000  | Li                        | 0.155086000  | -0.144506000 | -1.073810000 |
| H                         | 0.532619000  | 0.799100000  | 2.731946000  | O                         | -0.625312000 | 1.587054000  | -1.405866000 |
| H                         | 1.434837000  | 1.244745000  | 1.288196000  | O                         | 2.031409000  | -0.355924000 | -1.372510000 |
| H                         | -1.535681000 | 1.831217000  | 1.743958000  | O                         | -0.924555000 | -1.719111000 | -1.368221000 |
| H                         | -0.204993000 | 2.937794000  | 1.881459000  | C                         | -1.004431000 | -0.859469000 | 1.578798000  |
| H                         | 1.269348000  | -1.583182000 | 2.417468000  | C                         | -2.162696000 | -1.144919000 | 0.601386000  |
| H                         | 3.040439000  | -0.085943000 | 1.620976000  | C                         | -1.796076000 | -2.119063000 | -0.534252000 |
| H                         | 3.377747000  | -1.728070000 | 1.169312000  | C                         | 1.409852000  | -0.669355000 | 1.482006000  |
| H                         | 1.059824000  | -2.293920000 | 0.822470000  | C                         | 3.005398000  | -0.198624000 | -0.576851000 |
| H                         | -3.209244000 | -1.189403000 | 1.561618000  | C                         | 0.047256000  | 1.352614000  | 1.398754000  |
| H                         | -2.645735000 | 0.330888000  | 0.904189000  | C                         | -1.178925000 | 2.116936000  | 0.891741000  |
| H                         | -0.935329000 | -2.111421000 | 1.628074000  | C                         | -1.338152000 | 2.297385000  | -0.634753000 |
| H                         | -1.142435000 | -0.721526000 | 2.682903000  | N                         | 0.128948000  | -0.074976000 | 1.027921000  |
|                           |              |              |              | O                         | 4.210658000  | -0.116558000 | -0.915887000 |
|                           |              |              |              | O                         | -2.185336000 | 3.144881000  | -1.006201000 |
|                           |              |              |              | O                         | -2.371816000 | -3.233152000 | -0.567245000 |
|                           |              |              |              | C                         | 2.708115000  | -0.064961000 | 0.931904000  |
|                           |              |              |              | H                         | 0.083895000  | 1.453095000  | 2.499038000  |
|                           |              |              |              | H                         | 0.935479000  | 1.850232000  | 1.007761000  |
|                           |              |              |              | H                         | -2.106379000 | 1.675868000  | 1.270188000  |
|                           |              |              |              | H                         | -1.142900000 | 3.119189000  | 1.329822000  |
|                           |              |              |              | H                         | 1.467666000  | -0.629072000 | 2.584709000  |
|                           |              |              |              | H                         | 2.788550000  | 0.998122000  | 1.181225000  |
|                           |              |              |              | H                         | 3.533104000  | -0.543316000 | 1.467445000  |
|                           |              |              |              | H                         | 1.380937000  | -1.727314000 | 1.208713000  |
|                           |              |              |              | H                         | -2.987429000 | -1.570259000 | 1.178478000  |
|                           |              |              |              | H                         | -2.518084000 | -0.213394000 | 0.154673000  |
|                           |              |              |              | H                         | -0.617610000 | -1.819804000 | 1.929861000  |
|                           |              |              |              | H                         | -1.407559000 | -0.355780000 | 2.469120000  |
|                           |              |              |              |                           |              |              |              |
|                           |              |              |              | NTP Mg (II)               |              |              |              |
|                           |              |              |              | $\Delta G = -1056.867946$ |              |              |              |
|                           |              |              |              | Mg                        | 0.183655000  | -0.150163000 | -1.142281000 |
|                           |              |              |              | O                         | -0.945811000 | 1.443574000  | -1.390774000 |
|                           |              |              |              |                           |              |              |              |
| NTP K (I)                 |              |              |              |                           |              |              |              |
| $\Delta G = -1456.764343$ |              |              |              |                           |              |              |              |
| K                         | 0.139517000  | -0.235488000 | -1.754900000 |                           |              |              |              |
| O                         | -0.696003000 | 2.178144000  | -1.267036000 |                           |              |              |              |
| O                         | 2.585406000  | -0.743410000 | -1.107014000 |                           |              |              |              |
| O                         | -1.643897000 | -2.150550000 | -1.422458000 |                           |              |              |              |
| C                         | -1.052906000 | -0.817342000 | 1.639855000  |                           |              |              |              |
| C                         | -2.216574000 | -1.085500000 | 0.661446000  |                           |              |              |              |
| C                         | -1.989091000 | -2.352739000 | -0.221643000 |                           |              |              |              |
| C                         | 1.354406000  | -0.674229000 | 1.567660000  |                           |              |              |              |
| C                         | 3.302633000  | -0.192207000 | -0.228193000 |                           |              |              |              |
| C                         | 0.040059000  | 1.375030000  | 1.438958000  |                           |              |              |              |
| C                         | -1.234066000 | 2.161075000  | 1.094381000  |                           |              |              |              |
| C                         | -1.466471000 | 2.634829000  | -0.378104000 |                           |              |              |              |
| N                         | 0.094315000  | -0.056620000 | 1.089749000  |                           |              |              |              |
| O                         | 4.470023000  | 0.242767000  | -0.351707000 |                           |              |              |              |
| O                         | -2.413052000 | 3.440981000  | -0.522613000 |                           |              |              |              |
| O                         | -2.160745000 | -3.454229000 | 0.349675000  |                           |              |              |              |
| C                         | 2.700597000  | -0.026134000 | 1.205543000  |                           |              |              |              |
| H                         | 0.209223000  | 1.477238000  | 2.535212000  |                           |              |              |              |

|                          |              |              |              |                           |              |              |              |
|--------------------------|--------------|--------------|--------------|---------------------------|--------------|--------------|--------------|
| O                        | 2.134047000  | -0.278422000 | -1.287546000 | H                         | 0.356646000  | 2.354210000  | 0.853156000  |
| O                        | -0.776941000 | -1.875701000 | -1.189574000 | H                         | -2.494624000 | 1.347350000  | 1.337636000  |
| C                        | -0.909509000 | -0.867416000 | 1.674093000  | H                         | -1.985527000 | 2.994194000  | 1.118818000  |
| C                        | -2.066573000 | -1.307131000 | 0.756453000  | H                         | 1.541483000  | 0.595807000  | 2.700701000  |
| C                        | -1.661744000 | -2.292780000 | -0.348793000 | H                         | 2.377695000  | 1.888497000  | 0.580068000  |
| C                        | 1.473208000  | -0.395030000 | 1.587538000  | H                         | 3.537935000  | 0.982633000  | 1.519089000  |
| C                        | 3.090073000  | -0.045466000 | -0.455738000 | H                         | 1.802905000  | -0.872914000 | 1.765345000  |
| C                        | -0.114347000 | 1.453830000  | 1.407899000  | H                         | -2.469943000 | -1.909356000 | 1.731929000  |
| C                        | -1.424234000 | 2.066377000  | 0.904066000  | H                         | -2.444134000 | -0.660763000 | 0.498978000  |
| C                        | -1.605562000 | 2.229943000  | -0.614341000 | H                         | -0.035455000 | -1.526875000 | 2.176209000  |
| N                        | 0.132839000  | 0.021976000  | 1.061433000  | H                         | -1.121318000 | -0.255962000 | 2.698908000  |
| O                        | 4.288573000  | -0.053600000 | -0.763640000 |                           |              |              |              |
| O                        | -2.395469000 | 3.094350000  | -1.015650000 | NTP Na (I)                |              |              |              |
| O                        | -2.187651000 | -3.412087000 | -0.394744000 | $\Delta G = -1019.130644$ |              |              |              |
| C                        | 2.710928000  | 0.291725000  | 0.994630000  | Na                        | 0.174696000  | -0.120978000 | -1.500385000 |
| H                        | -0.081348000 | 1.561031000  | 2.501644000  | O                         | -0.296427000 | 2.110850000  | -1.270186000 |
| H                        | 0.712459000  | 2.039640000  | 1.004561000  | O                         | 2.290995000  | -0.913451000 | -1.257120000 |
| H                        | -2.290871000 | 1.513351000  | 1.279315000  | O                         | -1.512670000 | -1.667848000 | -1.570543000 |
| H                        | -1.507300000 | 3.062028000  | 1.346237000  | C                         | -1.140258000 | -0.777085000 | 1.576046000  |
| H                        | 1.488179000  | -0.241432000 | 2.675876000  | C                         | -2.302343000 | -0.918154000 | 0.572862000  |
| H                        | 2.637752000  | 1.381746000  | 1.064246000  | C                         | -2.042992000 | -2.021071000 | -0.473342000 |
| H                        | 3.560306000  | 0.017854000  | 1.624025000  | C                         | 1.268148000  | -0.928007000 | 1.475872000  |
| H                        | 1.557722000  | -1.470136000 | 1.416301000  | C                         | 3.052734000  | -0.363489000 | -0.409441000 |
| H                        | -2.819708000 | -1.784532000 | 1.385665000  | C                         | 0.206591000  | 1.271179000  | 1.453865000  |
| H                        | -2.542133000 | -0.443265000 | 0.284530000  | C                         | -0.949656000 | 2.192991000  | 1.061150000  |
| H                        | -0.409089000 | -1.766378000 | 2.038175000  | C                         | -1.163700000 | 2.506613000  | -0.438077000 |
| H                        | -1.327122000 | -0.371015000 | 2.557338000  | N                         | 0.088363000  | -0.141410000 | 1.037960000  |
|                          |              |              |              | O                         | 4.143263000  | 0.206456000  | -0.665817000 |
|                          |              |              |              | O                         | -2.196853000 | 3.167057000  | -0.715397000 |
|                          |              |              |              | O                         | -2.352898000 | -3.197910000 | -0.158627000 |
|                          |              |              |              | C                         | 2.655224000  | -0.412536000 | 1.083563000  |
|                          |              |              |              | H                         | 0.325389000  | 1.326985000  | 2.552811000  |
|                          |              |              |              | H                         | 1.119025000  | 1.675004000  | 1.014765000  |
|                          |              |              |              | H                         | -1.901231000 | 1.846936000  | 1.472280000  |
|                          |              |              |              | H                         | -0.766691000 | 3.158798000  | 1.547488000  |
|                          |              |              |              | H                         | 1.259777000  | -1.020779000 | 2.577766000  |
|                          |              |              |              | H                         | 2.860450000  | 0.567608000  | 1.519900000  |
|                          |              |              |              | H                         | 3.378333000  | -1.086599000 | 1.559274000  |
|                          |              |              |              | H                         | 1.143314000  | -1.936096000 | 1.073081000  |
|                          |              |              |              | H                         | -3.197771000 | -1.186276000 | 1.141605000  |
|                          |              |              |              | H                         | -2.491225000 | 0.033790000  | 0.073577000  |
|                          |              |              |              | H                         | -0.886241000 | -1.778802000 | 1.932930000  |
|                          |              |              |              | H                         | -1.489108000 | -0.223822000 | 2.459569000  |
|                          |              |              |              |                           |              |              |              |
|                          |              |              |              | NTP Ni (II)               |              |              |              |
|                          |              |              |              | $\Delta G = -2364.937718$ |              |              |              |
|                          |              |              |              | Ni                        | 0.255064000  | -0.425342000 | -0.887668000 |
|                          |              |              |              | O                         | -0.601524000 | 1.814438000  | -1.193758000 |
|                          |              |              |              |                           |              |              |              |
| NTP Mn (II)              |              |              |              |                           |              |              |              |
| $\Delta G = -2007.66298$ |              |              |              |                           |              |              |              |
| Mn                       | 0.232416000  | -0.087413000 | -0.952540000 |                           |              |              |              |
| O                        | -1.354600000 | 1.010451000  | -1.378613000 |                           |              |              |              |
| O                        | 2.173826000  | -0.444984000 | -1.088776000 |                           |              |              |              |
| O                        | -0.521679000 | -2.029065000 | -0.910889000 |                           |              |              |              |
| C                        | -0.693786000 | -0.737520000 | 1.812912000  |                           |              |              |              |
| C                        | -1.827064000 | -1.401948000 | 1.010174000  |                           |              |              |              |
| C                        | -1.375860000 | -2.432409000 | -0.038128000 |                           |              |              |              |
| C                        | 1.559480000  | 0.186402000  | 1.683062000  |                           |              |              |              |
| C                        | 3.102092000  | 0.117457000  | -0.386038000 |                           |              |              |              |
| C                        | -0.343490000 | 1.665784000  | 1.328094000  |                           |              |              |              |
| C                        | -1.754627000 | 1.968188000  | 0.823478000  |                           |              |              |              |
| C                        | -2.036747000 | 1.858439000  | -0.682215000 |                           |              |              |              |
| N                        | 0.174481000  | 0.276313000  | 1.104248000  |                           |              |              |              |
| O                        | 4.301070000  | 0.085435000  | -0.686810000 |                           |              |              |              |
| O                        | -2.935060000 | 2.560878000  | -1.160243000 |                           |              |              |              |
| O                        | -1.856477000 | -3.575718000 | -0.007421000 |                           |              |              |              |
| C                        | 2.663496000  | 0.873762000  | 0.875030000  |                           |              |              |              |
| H                        | -0.315034000 | 1.869406000  | 2.406732000  |                           |              |              |              |

|                   |              |              |              |                   |              |              |              |
|-------------------|--------------|--------------|--------------|-------------------|--------------|--------------|--------------|
| O                 | 2.005614000  | 0.061756000  | -1.183987000 | H                 | 1.371438000  | 1.388525000  | 1.135486000  |
| O                 | -1.359101000 | -1.250926000 | -1.161383000 | H                 | -1.595338000 | 1.863644000  | 1.696970000  |
| C                 | -0.848023000 | -1.045089000 | 1.700462000  | H                 | -0.309333000 | 3.025439000  | 1.751025000  |
| C                 | -2.230633000 | -0.944565000 | 1.055873000  | H                 | 1.340925000  | -1.363515000 | 2.504616000  |
| C                 | -2.345023000 | -1.501614000 | -0.358678000 | H                 | 3.032679000  | 0.172839000  | 1.621015000  |
| C                 | 1.557362000  | -0.989379000 | 1.492403000  | H                 | 3.458726000  | -1.492315000 | 1.387018000  |
| C                 | 3.062222000  | -0.067332000 | -0.444672000 | H                 | 1.178584000  | -2.179080000 | 0.951449000  |
| C                 | 0.345338000  | 1.147940000  | 1.443626000  | H                 | -3.154182000 | -1.084993000 | 1.659136000  |
| C                 | -0.880835000 | 2.022744000  | 1.196877000  | H                 | -2.578786000 | 0.325638000  | 0.795662000  |
| C                 | -1.353684000 | 2.225744000  | -0.263676000 | H                 | -0.849521000 | -2.038355000 | 1.689888000  |
| N                 | 0.286982000  | -0.307866000 | 1.042874000  | H                 | -1.099690000 | -0.623455000 | 2.695462000  |
| O                 | 4.203492000  | 0.078238000  | -0.884925000 |                   |              |              |              |
| O                 | -2.449540000 | 2.818655000  | -0.402948000 | NTP V(III)        |              |              |              |
| O                 | -3.349670000 | -2.122292000 | -0.708988000 | ΔG = -1800.530723 |              |              |              |
| C                 | 2.866468000  | -0.344654000 | 1.047143000  | V                 | 0.097783000  | -0.011387000 | -1.029691000 |
| H                 | 0.582195000  | 1.167788000  | 2.514572000  | O                 | -0.809598000 | 1.577872000  | -1.181670000 |
| H                 | 1.185641000  | 1.580015000  | 0.906793000  | O                 | 1.989474000  | 0.267457000  | -1.106606000 |
| H                 | -1.730112000 | 1.730579000  | 1.815874000  | O                 | -0.071338000 | -1.864169000 | -1.053846000 |
| H                 | -0.600400000 | 3.017966000  | 1.561623000  | C                 | -1.098871000 | -1.147210000 | 1.607860000  |
| H                 | 1.544777000  | -1.029096000 | 2.587922000  | C                 | -1.842191000 | -1.970812000 | 0.547648000  |
| H                 | 3.038547000  | 0.602803000  | 1.566023000  | C                 | -0.927946000 | -2.675690000 | -0.437257000 |
| H                 | 3.677511000  | -1.002799000 | 1.366378000  | C                 | 1.208517000  | -0.353374000 | 1.692233000  |
| H                 | 1.503976000  | -2.014394000 | 1.124528000  | C                 | 2.870566000  | 0.482996000  | -0.151196000 |
| H                 | -2.924890000 | -1.496662000 | 1.692383000  | C                 | -0.626509000 | 1.278331000  | 1.597424000  |
| H                 | -2.595703000 | 0.082817000  | 1.023087000  | C                 | -1.908434000 | 1.794797000  | 0.946214000  |
| H                 | -0.558570000 | -2.096383000 | 1.728870000  | C                 | -1.754802000 | 2.231205000  | -0.501982000 |
| H                 | -0.906951000 | -0.699715000 | 2.738284000  | N                 | -0.152733000 | -0.063335000 | 1.102453000  |
|                   |              |              |              | O                 | 4.056497000  | 0.649675000  | -0.395064000 |
|                   |              |              |              | O                 | -2.430714000 | 3.096443000  | -1.012766000 |
|                   |              |              |              | O                 | -0.965401000 | -3.867395000 | -0.664328000 |
|                   |              |              |              | C                 | 2.360133000  | 0.567701000  | 1.285753000  |
| NTP V(II)         |              |              |              | H                 | -0.772988000 | 1.204932000  | 2.679251000  |
| ΔG = -1800.685837 |              |              |              | H                 | 0.168481000  | 2.001378000  | 1.427547000  |
| V                 | 0.111201000  | -0.304990000 | -1.129177000 | H                 | -2.710412000 | 1.049711000  | 0.980797000  |
| O                 | -0.540206000 | 1.626673000  | -1.131753000 | H                 | -2.268575000 | 2.653926000  | 1.514184000  |
| O                 | 2.148155000  | -0.153752000 | -1.235374000 | H                 | 1.114070000  | -0.323761000 | 2.783619000  |
| O                 | -1.699600000 | -1.248326000 | -1.278377000 | H                 | 2.129703000  | 1.618776000  | 1.483173000  |
| C                 | -1.028394000 | -0.961947000 | 1.654272000  | H                 | 3.203047000  | 0.328776000  | 1.936679000  |
| C                 | -2.386435000 | -0.734835000 | 0.966219000  | H                 | 1.453781000  | -1.380236000 | 1.417937000  |
| C                 | -2.589067000 | -1.458981000 | -0.370086000 | H                 | -2.440484000 | -2.720116000 | 1.067431000  |
| C                 | 1.359138000  | -1.206980000 | 1.416889000  | H                 | -2.535956000 | -1.346210000 | -0.024765000 |
| C                 | 3.108364000  | -0.420722000 | -0.420739000 | H                 | -0.516845000 | -1.824823000 | 2.232436000  |
| C                 | 0.426748000  | 1.047289000  | 1.556470000  | H                 | -1.837849000 | -0.683847000 | 2.261484000  |
| C                 | -0.629492000 | 2.109179000  | 1.247806000  |                   |              |              |              |
| C                 | -0.873813000 | 2.474931000  | -0.225228000 | NTP Zn(II)        |              |              |              |
| N                 | 0.191808000  | -0.336250000 | 1.039331000  | ΔG = -2635.899421 |              |              |              |
| O                 | 4.305948000  | -0.416406000 | -0.740853000 | Zn                | 0.018624000  | -0.248619000 | -0.860741000 |
| O                 | -1.399179000 | 3.572791000  | -0.468790000 | O                 | 0.118982000  | 1.673343000  | -1.291553000 |
| O                 | -3.584863000 | -2.179784000 | -0.529726000 |                   |              |              |              |
| C                 | 2.764028000  | -0.719545000 | 1.047738000  |                   |              |              |              |
| H                 | 0.555713000  | 0.994259000  | 2.646947000  |                   |              |              |              |

|                           |              |              |              |                           |              |              |              |
|---------------------------|--------------|--------------|--------------|---------------------------|--------------|--------------|--------------|
| O                         | 1.799817000  | -1.074419000 | -1.102640000 | H                         | 1.950587000  | -2.120730000 | -0.639306000 |
| O                         | -3.488177000 | -1.656507000 | -0.997632000 | H                         | 2.147699000  | 2.591604000  | -0.815086000 |
| C                         | -1.121821000 | -0.906959000 | 1.860205000  | H                         | -0.185226000 | 3.381236000  | -0.523226000 |
| C                         | -2.434813000 | -0.893006000 | 1.068373000  | N                         | -3.083432000 | -0.693120000 | 0.105360000  |
| C                         | -2.402993000 | -1.734983000 | -0.192180000 | O                         | -2.242385000 | 1.904669000  | -0.158972000 |
| C                         | 1.300134000  | -0.617462000 | 1.803897000  | O                         | -4.990339000 | 1.504963000  | 0.540678000  |
| C                         | 2.799072000  | -0.921762000 | -0.295674000 | H                         | -4.149540000 | 1.039060000  | 0.342015000  |
| C                         | -0.118630000 | 1.364314000  | 1.702356000  | H                         | -4.743297000 | 2.440492000  | 0.472456000  |
| C                         | -0.938218000 | 2.300416000  | 0.799427000  | O                         | -3.626616000 | 4.112723000  | 0.116180000  |
| C                         | -0.320132000 | 2.647151000  | -0.560164000 | H                         | -2.945609000 | 3.393169000  | 0.005456000  |
| N                         | -0.003193000 | -0.075571000 | 1.295633000  | H                         | -3.329685000 | 4.646231000  | 0.860343000  |
| O                         | 3.936488000  | -1.338659000 | -0.541676000 | O                         | 2.935658000  | 0.067988000  | -0.873046000 |
| O                         | -0.275743000 | 3.829271000  | -0.918444000 | S                         | 4.077038000  | 0.173047000  | 0.278916000  |
| O                         | -1.375335000 | -1.627476000 | -1.068211000 | O                         | 3.511329000  | -0.777193000 | 1.461808000  |
| C                         | 2.545871000  | -0.173835000 | 1.020860000  | O                         | 4.178652000  | 1.532546000  | 0.774702000  |
| H                         | -0.535502000 | 1.400532000  | 2.715474000  | O                         | 5.218457000  | -0.519017000 | -0.269392000 |
| H                         | 0.891948000  | 1.768133000  | 1.770446000  | H                         | 2.912376000  | -0.285906000 | 2.049446000  |
| H                         | -1.938461000 | 1.899945000  | 0.617748000  |                           |              |              |              |
| H                         | -1.075741000 | 3.234862000  | 1.346180000  |                           |              |              |              |
| H                         | 1.415682000  | -0.330957000 | 2.856607000  |                           |              |              |              |
| H                         | 2.508568000  | 0.897137000  | 0.794435000  |                           |              |              |              |
| H                         | 3.418189000  | -0.321132000 | 1.658825000  |                           |              |              |              |
| H                         | 1.235683000  | -1.705719000 | 1.775526000  |                           |              |              |              |
| H                         | -3.218083000 | -1.288239000 | 1.722693000  |                           |              |              |              |
| H                         | -2.744456000 | 0.131883000  | 0.820036000  |                           |              |              |              |
| H                         | -0.766521000 | -1.938156000 | 1.900892000  |                           |              |              |              |
| H                         | -1.306756000 | -0.588404000 | 2.892561000  |                           |              |              |              |
|                           |              |              |              | 10-HBQS A1 (III)          |              |              |              |
|                           |              |              |              | $\Delta G = -1724.498528$ |              |              |              |
|                           |              |              |              | C                         | -3.494051000 | 2.883755000  | 0.174152000  |
|                           |              |              |              | C                         | -2.182145000 | 3.271695000  | -0.010707000 |
|                           |              |              |              | C                         | -1.162677000 | 2.315947000  | -0.156005000 |
|                           |              |              |              | C                         | -1.483848000 | 0.929831000  | -0.112836000 |
|                           |              |              |              | C                         | -3.769645000 | 1.529803000  | 0.213436000  |
|                           |              |              |              | C                         | 0.189321000  | 2.735509000  | -0.350338000 |
|                           |              |              |              | C                         | -0.431463000 | -0.057411000 | -0.264795000 |
|                           |              |              |              | C                         | 0.908995000  | 0.423988000  | -0.444856000 |
|                           |              |              |              | C                         | 1.182558000  | 1.827533000  | -0.489986000 |
|                           |              |              |              | C                         | 1.952866000  | -0.509604000 | -0.592170000 |
|                           |              |              |              | C                         | 1.734042000  | -1.868669000 | -0.594383000 |
|                           |              |              |              | C                         | 0.437960000  | -2.345112000 | -0.416970000 |
|                           |              |              |              | C                         | -0.628126000 | -1.474163000 | -0.251695000 |
|                           |              |              |              | H                         | 0.396736000  | 3.797747000  | -0.386095000 |
|                           |              |              |              | H                         | -4.295663000 | 3.599491000  | 0.288089000  |
|                           |              |              |              | H                         | -1.920611000 | 4.322613000  | -0.046150000 |
|                           |              |              |              | H                         | -4.784754000 | 1.180950000  | 0.359955000  |
|                           |              |              |              | H                         | 2.200351000  | 2.153333000  | -0.649284000 |
|                           |              |              |              | H                         | 2.557860000  | -2.555986000 | -0.733056000 |
|                           |              |              |              | H                         | 0.234984000  | -3.407945000 | -0.411074000 |
|                           |              |              |              | N                         | -2.814245000 | 0.582846000  | 0.078236000  |
|                           |              |              |              | O                         | -1.845392000 | -2.035688000 | -0.090278000 |
|                           |              |              |              | H                         | -4.960022000 | -2.234496000 | 1.794545000  |
|                           |              |              |              | H                         | -4.097872000 | -1.137509000 | 2.536243000  |
|                           |              |              |              | H                         | -5.494394000 | -1.643315000 | -1.142248000 |
|                           |              |              |              | H                         | -4.265230000 | -2.282158000 | -1.908834000 |
|                           |              |              |              | O                         | -4.289242000 | -1.540997000 | 1.672182000  |
|                           |              |              |              | O                         | -4.535199000 | -1.796238000 | -1.110841000 |
| 10-HBQS                   |              |              |              |                           |              |              |              |
| $\Delta G = -1482.392923$ |              |              |              |                           |              |              |              |
| C                         | -3.707604000 | -3.020999000 | 0.225199000  |                           |              |              |              |
| C                         | -2.395583000 | -3.394560000 | 0.025846000  |                           |              |              |              |
| C                         | -1.403337000 | -2.410953000 | -0.138102000 |                           |              |              |              |
| C                         | -1.779410000 | -1.028216000 | -0.099917000 |                           |              |              |              |
| C                         | -3.989918000 | -1.648916000 | 0.258491000  |                           |              |              |              |
| C                         | -0.037478000 | -2.778726000 | -0.339526000 |                           |              |              |              |
| C                         | -0.761854000 | -0.001981000 | -0.276383000 |                           |              |              |              |
| C                         | 0.596028000  | -0.432559000 | -0.451047000 |                           |              |              |              |
| C                         | 0.920055000  | -1.831531000 | -0.485746000 |                           |              |              |              |
| C                         | 1.610810000  | 0.529143000  | -0.617527000 |                           |              |              |              |
| C                         | 1.341477000  | 1.884927000  | -0.657936000 |                           |              |              |              |
| C                         | 0.038202000  | 2.320525000  | -0.493947000 |                           |              |              |              |
| C                         | -1.061841000 | 1.433537000  | -0.296794000 |                           |              |              |              |
| H                         | 0.217669000  | -3.832770000 | -0.373256000 |                           |              |              |              |
| H                         | -4.498108000 | -3.749695000 | 0.355352000  |                           |              |              |              |
| H                         | -2.110403000 | -4.441075000 | -0.006024000 |                           |              |              |              |
| H                         | -5.010380000 | -1.310108000 | 0.420345000  |                           |              |              |              |

|                           |              |              |              |                           |              |              |              |
|---------------------------|--------------|--------------|--------------|---------------------------|--------------|--------------|--------------|
| Al                        | -3.323074000 | -1.221353000 | 0.142532000  | C                         | -3.930161000 | 2.404009000  | 0.272396000  |
| O                         | 3.247370000  | -0.012873000 | -0.841663000 | C                         | -2.682138000 | 2.964672000  | 0.051720000  |
| S                         | 4.368899000  | 0.013178000  | 0.356497000  | C                         | -1.556659000 | 2.144644000  | -0.122511000 |
| O                         | 4.801791000  | -1.533346000 | 0.475019000  | C                         | -1.727032000 | 0.740170000  | -0.070303000 |
| O                         | 3.735307000  | 0.322617000  | 1.615641000  | C                         | -4.053698000 | 1.028196000  | 0.306859000  |
| O                         | 5.449467000  | 0.797530000  | -0.191028000 | C                         | -0.244355000 | 2.673901000  | -0.347989000 |
| H                         | 5.390356000  | -1.792560000 | -0.255956000 | C                         | -0.606559000 | -0.129008000 | -0.214654000 |
|                           |              |              |              | C                         | 0.683420000  | 0.431808000  | -0.428802000 |
| 10-HBQS Be (II)           |              |              |              | C                         | 0.828210000  | 1.854619000  | -0.501557000 |
| $\Delta G = -1497.006004$ |              |              |              | C                         | 1.761565000  | -0.464453000 | -0.555434000 |
| C                         | -3.816219000 | 2.571772000  | -0.191981000 | C                         | 1.592921000  | -1.832933000 | -0.486739000 |
| C                         | -2.534953000 | 3.061799000  | -0.030256000 | C                         | 0.323102000  | -2.375076000 | -0.257517000 |
| C                         | -1.454690000 | 2.177655000  | 0.123887000  | C                         | -0.755058000 | -1.526196000 | -0.123594000 |
| C                         | -1.703395000 | 0.776055000  | 0.106176000  | H                         | -0.127999000 | 3.749284000  | -0.394059000 |
| C                         | -3.995626000 | 1.193513000  | -0.205978000 | H                         | -4.809466000 | 3.015258000  | 0.417049000  |
| C                         | -0.118417000 | 2.657467000  | 0.303409000  | H                         | -2.565252000 | 4.041213000  | 0.016418000  |
| C                         | -0.612170000 | -0.152596000 | 0.283090000  | H                         | -5.008323000 | 0.552422000  | 0.483174000  |
| C                         | 0.705296000  | 0.377637000  | 0.451914000  | H                         | 1.809928000  | 2.270614000  | -0.680529000 |
| C                         | 0.916589000  | 1.796111000  | 0.458242000  | H                         | 2.445373000  | -2.487950000 | -0.608219000 |
| C                         | 1.769205000  | -0.523285000 | 0.636913000  | H                         | 0.178467000  | -3.445186000 | -0.192767000 |
| C                         | 1.576200000  | -1.889183000 | 0.694019000  | N                         | -2.985876000 | 0.212973000  | 0.132481000  |
| C                         | 0.295835000  | -2.407479000 | 0.529424000  | O                         | -1.992528000 | -2.054456000 | 0.111007000  |
| C                         | -0.807179000 | -1.572822000 | 0.317438000  | H                         | -4.542283000 | -2.555943000 | 1.232351000  |
| H                         | 0.046431000  | 3.728386000  | 0.317217000  | H                         | -3.743865000 | -1.568276000 | 2.191893000  |
| H                         | -4.668633000 | 3.227093000  | -0.306926000 | H                         | -4.773503000 | -1.307892000 | -1.459976000 |
| H                         | -2.348964000 | 4.129699000  | -0.017114000 | H                         | -3.563284000 | -2.310839000 | -1.769099000 |
| H                         | -4.983365000 | 0.765559000  | -0.323996000 | O                         | -4.086274000 | -1.695759000 | 1.287949000  |
| H                         | 1.921020000  | 2.170073000  | 0.598674000  | O                         | -4.022742000 | -1.797662000 | -1.080954000 |
| H                         | 2.418411000  | -2.547475000 | 0.863874000  | B                         | -3.150938000 | -1.305724000 | 0.116782000  |
| H                         | 0.126968000  | -3.476389000 | 0.566887000  | O                         | 3.023322000  | 0.078941000  | -0.847624000 |
| N                         | -2.985336000 | 0.322908000  | -0.070659000 | S                         | 4.185232000  | 0.154841000  | 0.313805000  |
| O                         | -1.998550000 | -2.122855000 | 0.164983000  | O                         | 4.731989000  | -1.357367000 | 0.362264000  |
| H                         | -5.118700000 | -2.511901000 | 0.661298000  | O                         | 3.573136000  | 0.376983000  | 1.600908000  |
| H                         | -4.602955000 | -1.534639000 | 1.766805000  | O                         | 5.182963000  | 1.032927000  | -0.246432000 |
| H                         | -4.535248000 | -1.495383000 | -2.197182000 | H                         | 5.312045000  | -1.547323000 | -0.396578000 |
| H                         | -3.214527000 | -2.337778000 | -2.222513000 |                           |              |              |              |
| O                         | -4.632453000 | -1.689682000 | 0.812633000  | 10-HBQS Ca (I)            |              |              |              |
| O                         | -3.858040000 | -1.906859000 | -1.644263000 | $\Delta G = -2159.907469$ |              |              |              |
| Be                        | -3.281268000 | -1.346385000 | -0.145650000 | C                         | -2.907773000 | 3.487885000  | -0.293612000 |
| O                         | 3.053413000  | 0.019173000  | 0.879986000  | C                         | -1.561265000 | 3.719997000  | -0.124374000 |
| S                         | 4.219973000  | -0.061551000 | -0.258460000 | C                         | -0.682777000 | 2.641001000  | 0.072935000  |
| O                         | 3.626487000  | 0.857022000  | -1.447234000 | C                         | -1.198098000 | 1.304510000  | 0.102956000  |
| O                         | 4.364686000  | -1.422315000 | -0.733804000 | C                         | -3.336582000 | 2.160006000  | -0.277338000 |
| O                         | 5.319655000  | 0.674367000  | 0.310700000  | C                         | 0.715463000  | 2.885558000  | 0.237343000  |
| H                         | 3.137986000  | 0.322091000  | -2.096246000 | C                         | -0.279634000 | 0.196895000  | 0.342059000  |
|                           |              |              |              | C                         | 1.118070000  | 0.505764000  | 0.477344000  |
| 10-HBQS B (III)           |              |              |              | C                         | 1.580478000  | 1.862335000  | 0.421471000  |
| $\Delta G = -1506.824275$ |              |              |              | C                         | 2.038368000  | -0.534238000 | 0.704519000  |

|                           |              |              |              |                           |              |              |              |
|---------------------------|--------------|--------------|--------------|---------------------------|--------------|--------------|--------------|
| C                         | 1.644553000  | -1.848541000 | 0.855694000  | N                         | -2.468410000 | 0.842507000  | -0.200800000 |
| C                         | 0.300305000  | -2.161919000 | 0.741020000  | O                         | -1.662208000 | -1.767753000 | -0.437008000 |
| C                         | -0.694202000 | -1.190139000 | 0.476751000  | H                         | -5.862874000 | -0.603863000 | -0.132346000 |
| H                         | 1.066758000  | 3.911029000  | 0.209401000  | H                         | -5.366678000 | -0.296423000 | 1.304710000  |
| H                         | -3.618281000 | 4.289999000  | -0.444398000 | H                         | -4.678705000 | -3.152148000 | -0.285909000 |
| H                         | -1.160860000 | 4.727757000  | -0.140999000 | H                         | -3.145028000 | -3.366175000 | -0.101989000 |
| H                         | -4.393551000 | 1.955138000  | -0.422257000 | O                         | -5.113603000 | -0.259743000 | 0.372260000  |
| H                         | 2.636684000  | 2.055961000  | 0.543534000  | O                         | -3.896419000 | -2.817745000 | 0.172375000  |
| H                         | 2.380201000  | -2.616716000 | 1.059357000  | Co                        | -3.256067000 | -0.928253000 | -0.063037000 |
| H                         | -0.032577000 | -3.186629000 | 0.855628000  | O                         | 3.475969000  | -0.255915000 | 0.920902000  |
| N                         | -2.539204000 | 1.105937000  | -0.095020000 | S                         | 4.712994000  | -0.283854000 | -0.142909000 |
| O                         | -1.923158000 | -1.583587000 | 0.382506000  | O                         | 4.344126000  | 0.913544000  | -1.163028000 |
| H                         | -4.185044000 | -2.181172000 | 2.442062000  | O                         | 4.727172000  | -1.539043000 | -0.866292000 |
| H                         | -5.663929000 | -1.947319000 | 2.055526000  | O                         | 5.845023000  | 0.175784000  | 0.620448000  |
| H                         | -4.105990000 | -2.655477000 | -3.008388000 | H                         | 3.837936000  | 0.584386000  | -1.925328000 |
| H                         | -2.722302000 | -2.976631000 | -2.401110000 |                           |              |              |              |
| O                         | -4.758250000 | -1.855234000 | 1.738526000  | 10-HBQS Co (III)          |              |              |              |
| O                         | -3.518780000 | -2.448713000 | -2.272266000 | $\Delta G = -2864.674486$ |              |              |              |
| Ca                        | -3.883297000 | -1.023400000 | -0.358245000 | C                         | -3.401812000 | 3.018408000  | -0.040533000 |
| O                         | 3.402723000  | -0.186328000 | 0.901401000  | C                         | -2.109710000 | 3.483313000  | -0.080369000 |
| S                         | 4.506802000  | -0.489255000 | -0.256174000 | C                         | -1.036773000 | 2.570316000  | -0.131039000 |
| O                         | 4.070812000  | 0.504367000  | -1.456187000 | C                         | -1.316653000 | 1.171878000  | -0.154778000 |
| O                         | 4.399001000  | -1.860705000 | -0.713265000 | C                         | -3.613275000 | 1.637519000  | -0.018237000 |
| O                         | 5.737610000  | 0.045804000  | 0.270562000  | C                         | 0.313215000  | 3.024162000  | -0.150776000 |
| H                         | 3.429311000  | 0.079071000  | -2.050337000 | C                         | -0.230362000 | 0.244063000  | -0.258507000 |
|                           |              |              |              | C                         | 1.098758000  | 0.741406000  | -0.258416000 |
| 10-HBQS Co (II)           |              |              |              | C                         | 1.349062000  | 2.143903000  | -0.198587000 |
| $\Delta G = -2864.921469$ |              |              |              | C                         | 2.172327000  | -0.188149000 | -0.330096000 |
| C                         | -2.927356000 | 3.196109000  | -0.428709000 | C                         | 1.971370000  | -1.561572000 | -0.392443000 |
| C                         | -1.620445000 | 3.495179000  | -0.112328000 | C                         | 0.676897000  | -2.047522000 | -0.394817000 |
| C                         | -0.703865000 | 2.457399000  | 0.117390000  | C                         | -0.426057000 | -1.170611000 | -0.365534000 |
| C                         | -1.135167000 | 1.100020000  | 0.017468000  | H                         | 0.497264000  | 4.090933000  | -0.119300000 |
| C                         | -3.309888000 | 1.858942000  | -0.442772000 | H                         | -4.252516000 | 3.684361000  | -0.001937000 |
| C                         | 0.655110000  | 2.755412000  | 0.451165000  | H                         | -1.899772000 | 4.545899000  | -0.068648000 |
| C                         | -0.155817000 | 0.040330000  | 0.134264000  | H                         | -4.617550000 | 1.240897000  | 0.058814000  |
| C                         | 1.200496000  | 0.395821000  | 0.436990000  | H                         | 2.370842000  | 2.494731000  | -0.200351000 |
| C                         | 1.564124000  | 1.768676000  | 0.628210000  | H                         | 2.808190000  | -2.242655000 | -0.457543000 |
| C                         | 2.166523000  | -0.622029000 | 0.523782000  | H                         | 0.480594000  | -3.109376000 | -0.463352000 |
| C                         | 1.857034000  | -1.952061000 | 0.320023000  | N                         | -2.618589000 | 0.747487000  | -0.069425000 |
| C                         | 0.554528000  | -2.301201000 | -0.006713000 | O                         | -1.607935000 | -1.709396000 | -0.498125000 |
| C                         | -0.464740000 | -1.339907000 | -0.105313000 | H                         | -4.674168000 | -1.711865000 | 1.802330000  |
| H                         | 0.938306000  | 3.795870000  | 0.559955000  | H                         | -3.913369000 | -0.428594000 | 2.274906000  |
| H                         | -3.661111000 | 3.964010000  | -0.632806000 | H                         | -4.548056000 | -3.078769000 | -0.915945000 |
| H                         | -1.283116000 | 4.522930000  | -0.043124000 | H                         | -3.237264000 | -3.586206000 | -0.249419000 |
| H                         | -4.338746000 | 1.589609000  | -0.625115000 | O                         | -4.284165000 | -0.876688000 | 1.500393000  |
| H                         | 2.585753000  | 2.005468000  | 0.889195000  | O                         | -3.925240000 | -2.906140000 | -0.194067000 |
| H                         | 2.624842000  | -2.709354000 | 0.410812000  | Co                        | -3.194238000 | -1.065886000 | -0.091962000 |
| H                         | 0.290504000  | -3.336507000 | -0.181912000 | O                         | 3.423827000  | 0.385092000  | -0.396957000 |



|                           |              |              |              |                           |              |              |              |
|---------------------------|--------------|--------------|--------------|---------------------------|--------------|--------------|--------------|
| S                         | 4.769191000  | -0.220686000 | 0.364577000  | C                         | -0.966287000 | 2.589793000  | -0.113096000 |
| O                         | 5.174384000  | -1.443017000 | -0.588518000 | C                         | -1.292569000 | 1.198738000  | -0.112720000 |
| O                         | 4.374183000  | -0.817578000 | 1.613176000  | C                         | -3.562776000 | 1.756536000  | 0.019617000  |
| O                         | 5.716135000  | 0.856645000  | 0.255299000  | C                         | 0.388459000  | 3.013000000  | -0.158530000 |
| H                         | 5.601872000  | -1.135912000 | -1.408664000 | C                         | -0.220867000 | 0.239778000  | -0.211832000 |
|                           |              |              |              | C                         | 1.116999000  | 0.716138000  | -0.253235000 |
| 10-HBQS Cr (II)           |              |              |              | C                         | 1.403660000  | 2.107943000  | -0.214965000 |
| $\Delta G = -2526.630837$ |              |              |              | C                         | 2.193231000  | -0.220975000 | -0.346016000 |
| C                         | -2.990500000 | -3.293850000 | 0.396345000  | C                         | 1.989506000  | -1.594377000 | -0.429558000 |
| C                         | -1.669231000 | -3.574759000 | 0.092320000  | C                         | 0.697415000  | -2.066156000 | -0.408616000 |
| C                         | -0.763342000 | -2.518008000 | -0.089648000 | C                         | -0.421726000 | -1.190744000 | -0.295654000 |
| C                         | -1.207992000 | -1.165914000 | 0.031068000  | H                         | 0.598009000  | 4.075669000  | -0.146414000 |
| C                         | -3.378323000 | -1.967960000 | 0.485363000  | H                         | -4.134699000 | 3.828502000  | 0.017708000  |
| C                         | 0.606846000  | -2.791516000 | -0.398876000 | H                         | -1.748390000 | 4.599921000  | -0.073307000 |
| C                         | -0.254091000 | -0.083885000 | -0.115754000 | H                         | -4.580656000 | 1.399937000  | 0.097090000  |
| C                         | 1.112913000  | -0.420961000 | -0.404336000 | H                         | 2.432568000  | 2.434952000  | -0.243654000 |
| C                         | 1.504110000  | -1.790941000 | -0.557671000 | H                         | 2.823250000  | -2.276006000 | -0.524622000 |
| C                         | 2.059386000  | 0.609919000  | -0.542729000 | H                         | 0.487762000  | -3.125254000 | -0.481216000 |
| C                         | 1.725905000  | 1.944152000  | -0.432171000 | N                         | -2.612844000 | 0.819669000  | -0.020956000 |
| C                         | 0.412006000  | 2.281528000  | -0.139155000 | O                         | -1.577995000 | -1.749941000 | -0.283060000 |
| C                         | -0.583534000 | 1.308823000  | 0.030223000  | H                         | -6.091782000 | -0.862223000 | 0.181360000  |
| H                         | 0.910379000  | -3.826777000 | -0.505168000 | H                         | -5.559194000 | -0.795776000 | 1.644442000  |
| H                         | -3.719683000 | -4.076497000 | 0.559517000  | H                         | -4.764326000 | -3.509507000 | -0.281501000 |
| H                         | -1.320347000 | -4.596215000 | -0.001202000 | H                         | -3.237123000 | -3.785345000 | -0.457290000 |
| H                         | -4.407309000 | -1.717791000 | 0.720875000  | O                         | -5.305794000 | -0.691330000 | 0.717389000  |
| H                         | 2.534280000  | -2.013734000 | -0.796704000 | O                         | -3.882256000 | -3.165755000 | -0.092005000 |
| H                         | 2.478784000  | 2.709374000  | -0.567858000 | Cr                        | -3.334511000 | -1.150248000 | 0.081043000  |
| H                         | 0.121545000  | 3.319585000  | -0.036309000 | O                         | 3.446520000  | 0.345338000  | -0.421095000 |
| N                         | -2.543325000 | -0.920324000 | 0.291569000  | S                         | 4.782964000  | -0.256607000 | 0.362296000  |
| O                         | -1.792389000 | 1.752253000  | 0.334068000  | O                         | 5.195849000  | -1.488627000 | -0.574792000 |
| H                         | -4.150456000 | 1.720006000  | -2.037767000 | O                         | 4.371353000  | -0.840937000 | 1.611476000  |
| H                         | -3.596526000 | 0.275530000  | -2.265735000 | O                         | 5.734105000  | 0.817157000  | 0.254160000  |
| H                         | -5.113045000 | 2.977489000  | 0.966770000  | H                         | 5.630508000  | -1.189760000 | -1.394204000 |
| H                         | -3.688974000 | 3.486344000  | 0.632792000  |                           |              |              |              |
| O                         | -3.965296000 | 0.875613000  | -1.605357000 | 10-HBQS Cu (II)           |              |              |              |
| O                         | -4.339050000 | 2.804516000  | 0.415187000  | $\Delta G = -3122.634709$ |              |              |              |
| Cr                        | -3.417958000 | 0.856565000  | 0.361580000  | C                         | -2.882206000 | 3.232100000  | -0.391777000 |
| O                         | 3.380137000  | 0.247025000  | -0.908626000 | C                         | -1.555570000 | 3.524776000  | -0.159418000 |
| S                         | 4.603661000  | 0.352757000  | 0.163820000  | C                         | -0.632664000 | 2.490176000  | 0.060278000  |
| O                         | 4.246212000  | -0.798696000 | 1.239343000  | C                         | -1.074397000 | 1.131372000  | 0.035284000  |
| O                         | 4.587039000  | 1.642252000  | 0.824338000  | C                         | -3.268004000 | 1.897557000  | -0.361397000 |
| O                         | 5.753010000  | -0.122470000 | -0.563570000 | C                         | 0.741531000  | 2.794615000  | 0.311162000  |
| H                         | 3.724805000  | -0.440424000 | 1.977848000  | C                         | -0.104787000 | 0.064464000  | 0.191370000  |
|                           |              |              |              | C                         | 1.264033000  | 0.430595000  | 0.427507000  |
| 10-HBQS Cr (III)          |              |              |              | C                         | 1.647752000  | 1.809340000  | 0.503763000  |
| $\Delta G = -2526.490067$ |              |              |              | C                         | 2.226457000  | -0.581967000 | 0.583413000  |
| C                         | -3.308229000 | 3.131998000  | -0.013905000 | C                         | 1.902324000  | -1.921863000 | 0.526571000  |
| C                         | -2.003388000 | 3.546934000  | -0.066499000 | C                         | 0.589045000  | -2.287413000 | 0.271602000  |

|    |              |              |              |                           |              |              |              |
|----|--------------|--------------|--------------|---------------------------|--------------|--------------|--------------|
| C  | -0.426030000 | -1.333207000 | 0.093254000  | H                         | -5.770580000 | 0.985091000  | -0.789642000 |
| H  | 1.037439000  | 3.836379000  | 0.347815000  | H                         | -5.178994000 | -0.372976000 | -1.238237000 |
| H  | -3.619408000 | 4.000984000  | -0.577991000 | H                         | -4.793034000 | 3.019510000  | 0.876538000  |
| H  | -1.206910000 | 4.550981000  | -0.146146000 | H                         | -3.328851000 | 3.403133000  | 0.488643000  |
| H  | -4.303251000 | 1.624498000  | -0.514476000 | O                         | -5.119014000 | 0.309917000  | -0.556526000 |
| H  | 2.681806000  | 2.049896000  | 0.704551000  | O                         | -4.057423000 | 2.795697000  | 0.291034000  |
| H  | 2.666043000  | -2.674451000 | 0.673178000  | Fe                        | -3.300775000 | 0.940899000  | 0.087611000  |
| H  | 0.312114000  | -3.332047000 | 0.209460000  | O                         | 3.487985000  | 0.213436000  | -0.913549000 |
| N  | -2.412420000 | 0.888887000  | -0.141810000 | S                         | 4.703634000  | 0.308051000  | 0.171984000  |
| O  | -1.626831000 | -1.803704000 | -0.170678000 | O                         | 4.319770000  | -0.835704000 | 1.245751000  |
| H  | -5.743523000 | -1.046145000 | 0.611480000  | O                         | 4.693657000  | 1.599948000  | 0.827321000  |
| H  | -5.183010000 | 0.182045000  | 1.367948000  | O                         | 5.852692000  | -0.183082000 | -0.544393000 |
| H  | -4.650054000 | -2.847525000 | -1.230813000 | H                         | 3.805640000  | -0.466819000 | 1.984258000  |
| H  | -3.365822000 | -3.358749000 | -0.525860000 |                           |              |              |              |
| O  | -5.109052000 | -0.319249000 | 0.544057000  |                           |              |              |              |
| O  | -4.101253000 | -2.734058000 | -0.442500000 |                           |              |              |              |
| Cu | -3.241938000 | -0.894314000 | -0.058232000 |                           |              |              |              |
| O  | 3.547279000  | -0.191263000 | 0.908454000  |                           |              |              |              |
| S  | 4.755563000  | -0.329031000 | -0.180776000 |                           |              |              |              |
| O  | 4.358671000  | 0.765555000  | -1.300099000 |                           |              |              |              |
| O  | 4.746295000  | -1.648363000 | -0.779064000 |                           |              |              |              |
| O  | 5.907909000  | 0.196692000  | 0.505146000  |                           |              |              |              |
| H  | 3.839664000  | 0.363390000  | -2.017534000 |                           |              |              |              |
|    |              |              |              | 10-HBQS Fe(III)           |              |              |              |
|    |              |              |              | $\Delta G = -2745.638817$ |              |              |              |
|    |              |              |              | C                         | -3.353222000 | -3.046169000 | 0.085854000  |
|    |              |              |              | C                         | -2.050224000 | -3.487959000 | 0.106422000  |
|    |              |              |              | C                         | -0.992196000 | -2.559349000 | 0.145055000  |
|    |              |              |              | C                         | -1.291682000 | -1.166670000 | 0.169353000  |
|    |              |              |              | C                         | -3.586240000 | -1.673176000 | 0.051799000  |
|    |              |              |              | C                         | 0.364888000  | -2.997501000 | 0.163824000  |
|    |              |              |              | C                         | -0.218435000 | -0.220649000 | 0.303272000  |
|    |              |              |              | C                         | 1.120220000  | -0.705757000 | 0.317517000  |
|    |              |              |              | C                         | 1.386928000  | -2.105364000 | 0.230054000  |
|    |              |              |              | C                         | 2.178904000  | 0.226414000  | 0.453460000  |
|    |              |              |              | C                         | 1.962264000  | 1.584347000  | 0.602683000  |
|    |              |              |              | C                         | 0.658749000  | 2.058793000  | 0.607140000  |
|    |              |              |              | C                         | -0.427470000 | 1.183308000  | 0.467920000  |
|    |              |              |              | H                         | 0.561508000  | -4.061850000 | 0.124584000  |
|    |              |              |              | H                         | -4.191904000 | -3.728018000 | 0.068215000  |
|    |              |              |              | H                         | -1.822608000 | -4.547088000 | 0.096497000  |
|    |              |              |              | H                         | -4.597143000 | -1.292078000 | -0.004379000 |
|    |              |              |              | H                         | 2.413328000  | -2.442730000 | 0.240646000  |
|    |              |              |              | H                         | 2.792954000  | 2.265987000  | 0.725175000  |
|    |              |              |              | H                         | 0.451448000  | 3.112983000  | 0.735079000  |
|    |              |              |              | N                         | -2.601535000 | -0.763661000 | 0.075072000  |
|    |              |              |              | O                         | -1.627858000 | 1.728181000  | 0.539675000  |
|    |              |              |              | H                         | -5.263507000 | 1.484282000  | -1.570168000 |
|    |              |              |              | H                         | -4.567172000 | 0.181372000  | -2.072868000 |
|    |              |              |              | H                         | -4.624336000 | 3.244902000  | 0.473355000  |
|    |              |              |              | H                         | -3.096821000 | 3.579023000  | 0.450319000  |
|    |              |              |              | O                         | -4.671649000 | 0.764609000  | -1.306775000 |
|    |              |              |              | O                         | -3.776864000 | 2.999973000  | 0.074667000  |
|    |              |              |              | Fe                        | -3.170351000 | 1.091865000  | -0.042405000 |
|    |              |              |              | O                         | 3.456215000  | -0.322223000 | 0.515412000  |
|    |              |              |              | S                         | 4.694104000  | 0.201824000  | -0.441732000 |
|    |              |              |              | O                         | 5.190818000  | 1.515738000  | 0.336613000  |
|    |              |              |              |                           |              |              |              |

10-HBQS Fe(II)

$\Delta G = -2745.870268$

|   |              |              |              |
|---|--------------|--------------|--------------|
| C | -2.936917000 | -3.193932000 | 0.444114000  |
| C | -1.622168000 | -3.496847000 | 0.162039000  |
| C | -0.700750000 | -2.466349000 | -0.083304000 |
| C | -1.135126000 | -1.106931000 | -0.039521000 |
| C | -3.316478000 | -1.857493000 | 0.416416000  |
| C | 0.665813000  | -2.775507000 | -0.369645000 |
| C | -0.159690000 | -0.046357000 | -0.186866000 |
| C | 1.204092000  | -0.414135000 | -0.440978000 |
| C | 1.576554000  | -1.792818000 | -0.558416000 |
| C | 2.170919000  | 0.599331000  | -0.567909000 |
| C | 1.854749000  | 1.937682000  | -0.457885000 |
| C | 0.543136000  | 2.300554000  | -0.184439000 |
| C | -0.475354000 | 1.346392000  | -0.045665000 |
| H | 0.953569000  | -3.818440000 | -0.430862000 |
| H | -3.671189000 | -3.957491000 | 0.661299000  |
| H | -1.281329000 | -4.525419000 | 0.135072000  |
| H | -4.344976000 | -1.583036000 | 0.607527000  |
| H | 2.605524000  | -2.036215000 | -0.781168000 |
| H | 2.622559000  | 2.690641000  | -0.578590000 |
| H | 0.271961000  | 3.343862000  | -0.084079000 |
| N | -2.469895000 | -0.847557000 | 0.157003000  |
| O | -1.684129000 | 1.806953000  | 0.211980000  |

|                           |              |              |              |                           |              |              |              |
|---------------------------|--------------|--------------|--------------|---------------------------|--------------|--------------|--------------|
| O                         | 4.166798000  | 0.677180000  | -1.695336000 | C                         | -3.783473000 | 2.074255000  | -0.298869000 |
| O                         | 5.672179000  | -0.850599000 | -0.338153000 | C                         | 0.241972000  | 2.859559000  | 0.362402000  |
| H                         | 5.686419000  | 1.286685000  | 1.143339000  | C                         | -0.699244000 | 0.148781000  | 0.231271000  |
|                           |              |              |              | C                         | 0.685874000  | 0.471400000  | 0.435635000  |
| 10-HBQS K (I)             |              |              |              | C                         | 1.118376000  | 1.838373000  | 0.507150000  |
| $\Delta G = -2082.298144$ |              |              |              | C                         | 1.622213000  | -0.567103000 | 0.593674000  |
| C                         | -2.591321000 | -3.925840000 | -0.002468000 | C                         | 1.252757000  | -1.896890000 | 0.595369000  |
| C                         | -1.231955000 | -4.032874000 | 0.195542000  | C                         | -0.078736000 | -2.225063000 | 0.399101000  |
| C                         | -0.445178000 | -2.871440000 | 0.302704000  | C                         | -1.092667000 | -1.253929000 | 0.207625000  |
| C                         | -1.078737000 | -1.588882000 | 0.220973000  | H                         | 0.576782000  | 3.889506000  | 0.419587000  |
| C                         | -3.125268000 | -2.635643000 | -0.112987000 | H                         | -4.108775000 | 4.206200000  | -0.377589000 |
| C                         | 0.969595000  | -2.967112000 | 0.476101000  | H                         | -1.676152000 | 4.686386000  | 0.023694000  |
| C                         | -0.277016000 | -0.380059000 | 0.374079000  | H                         | -4.828646000 | 1.830094000  | -0.468170000 |
| C                         | 1.144650000  | -0.541366000 | 0.502192000  | H                         | 2.165144000  | 2.041577000  | 0.684140000  |
| C                         | 1.732018000  | -1.850584000 | 0.552127000  | H                         | 1.998162000  | -2.667875000 | 0.746279000  |
| C                         | 1.965733000  | 0.595936000  | 0.613607000  | H                         | -0.380935000 | -3.265826000 | 0.396111000  |
| C                         | 1.447001000  | 1.874266000  | 0.657658000  | N                         | -2.959036000 | 1.039616000  | -0.149028000 |
| C                         | 0.075650000  | 2.048773000  | 0.572758000  | O                         | -2.311799000 | -1.656926000 | 0.030396000  |
| C                         | -0.840146000 | 0.969084000  | 0.435280000  | H                         | -4.845379000 | -3.000715000 | -0.255846000 |
| H                         | 1.421311000  | -3.951502000 | 0.536705000  | H                         | -6.157475000 | -2.201472000 | 0.050258000  |
| H                         | -3.230190000 | -4.795892000 | -0.087545000 | H                         | -3.126535000 | -4.635628000 | -0.679066000 |
| H                         | -0.751369000 | -5.003058000 | 0.266233000  | H                         | -2.836308000 | -3.264537000 | 0.027836000  |
| H                         | -4.191004000 | -2.517268000 | -0.298750000 | O                         | -5.309776000 | -2.146116000 | -0.401945000 |
| H                         | 2.802779000  | -1.934343000 | 0.678900000  | O                         | -3.429815000 | -4.064136000 | 0.034431000  |
| H                         | 2.107670000  | 2.726442000  | 0.765827000  | Li                        | -3.896089000 | -0.757246000 | -0.214690000 |
| H                         | -0.342611000 | 3.047599000  | 0.618597000  | O                         | 2.970279000  | -0.214543000 | 0.878760000  |
| N                         | -2.418543000 | -1.516468000 | -0.014057000 | S                         | 4.125181000  | -0.373358000 | -0.256627000 |
| O                         | -2.103693000 | 1.221976000  | 0.388930000  | O                         | 3.704569000  | 0.719597000  | -1.372792000 |
| H                         | -4.714433000 | 3.202218000  | 0.183008000  | O                         | 4.078431000  | -1.696061000 | -0.848464000 |
| H                         | -5.805207000 | 3.552839000  | -0.870652000 | O                         | 5.318819000  | 0.140597000  | 0.368318000  |
| H                         | -3.307988000 | 3.515569000  | 2.067688000  | H                         | 3.095739000  | 0.336757000  | -2.027169000 |
| H                         | -2.713798000 | 2.655211000  | 0.889502000  |                           |              |              |              |
| O                         | -5.413969000 | 2.815690000  | -0.391439000 | 10-HBQS Mg (II)           |              |              |              |
| O                         | -3.230709000 | 3.488551000  | 1.108185000  | $\Delta G = -1682.354643$ |              |              |              |
| O                         | 3.366277000  | 0.411352000  | 0.789417000  | C                         | -3.279300000 | 3.057366000  | -0.357094000 |
| S                         | 4.371853000  | 0.536279000  | -0.487280000 | C                         | -1.955375000 | 3.393998000  | -0.176845000 |
| O                         | 4.453930000  | 2.131390000  | -0.741510000 | C                         | -0.993918000 | 2.392654000  | 0.037920000  |
| O                         | 3.758847000  | 0.008692000  | -1.685449000 | C                         | -1.394802000 | 1.019479000  | 0.073975000  |
| O                         | 5.644656000  | 0.052543000  | 0.002761000  | C                         | -3.608712000 | 1.706092000  | -0.313459000 |
| H                         | 4.989371000  | 2.565163000  | -0.054969000 | C                         | 0.376975000  | 2.752703000  | 0.219113000  |
| K                         | -4.081959000 | 0.513934000  | -1.120644000 | C                         | -0.389892000 | -0.012569000 | 0.297023000  |
|                           |              |              |              | C                         | 0.975644000  | 0.413525000  | 0.450376000  |
| 10-HBQS Li (I)            |              |              |              | C                         | 1.321047000  | 1.804788000  | 0.414931000  |
| $\Delta G = -1489.900444$ |              |              |              | C                         | 1.980499000  | -0.547166000 | 0.662863000  |
| C                         | -3.384386000 | 3.412421000  | -0.248275000 | C                         | 1.703187000  | -1.895101000 | 0.768214000  |
| C                         | -2.048253000 | 3.668781000  | -0.028025000 | C                         | 0.393782000  | -2.321571000 | 0.622121000  |
| C                         | -1.144768000 | 2.603480000  | 0.132857000  | C                         | -0.675563000 | -1.433109000 | 0.379685000  |
| C                         | -1.630110000 | 1.258335000  | 0.067350000  | H                         | 0.641334000  | 3.803700000  | 0.196800000  |

|                           |              |              |              |                           |              |              |              |
|---------------------------|--------------|--------------|--------------|---------------------------|--------------|--------------|--------------|
| H                         | -4.046571000 | 3.800825000  | -0.526211000 | H                         | -4.824936000 | -3.202509000 | -0.771908000 |
| H                         | -1.636512000 | 4.430163000  | -0.198574000 | H                         | -3.308025000 | -3.469536000 | -0.487644000 |
| H                         | -4.640320000 | 1.399335000  | -0.447707000 | O                         | -5.289706000 | -0.299965000 | 0.337828000  |
| H                         | 2.355152000  | 2.086052000  | 0.553939000  | O                         | -4.049836000 | -2.877120000 | -0.298379000 |
| H                         | 2.500648000  | -2.602151000 | 0.958407000  | Mn                        | -3.357608000 | -0.953236000 | -0.074935000 |
| H                         | 0.150694000  | -3.374605000 | 0.694783000  | O                         | 3.500922000  | -0.208692000 | 0.907246000  |
| N                         | -2.723348000 | 0.723209000  | -0.106327000 | S                         | 4.686699000  | -0.316880000 | -0.207934000 |
| O                         | -1.863385000 | -1.947951000 | 0.249541000  | O                         | 4.235870000  | 0.760179000  | -1.324700000 |
| H                         | -6.181896000 | -1.420948000 | 0.722926000  | O                         | 4.703181000  | -1.639222000 | -0.800189000 |
| H                         | -5.495705000 | -0.387622000 | 1.655267000  | O                         | 5.840952000  | 0.244129000  | 0.446939000  |
| H                         | -5.033873000 | -2.665828000 | -1.964310000 | H                         | 3.693505000  | 0.345235000  | -2.017133000 |
| H                         | -3.718317000 | -3.420614000 | -1.623205000 |                           |              |              |              |
| O                         | -5.408023000 | -0.850753000 | 0.812544000  | 10-HBQS Na (I)            |              |              |              |
| O                         | -4.307731000 | -2.714435000 | -1.330753000 | $\Delta G = -1644.661552$ |              |              |              |
| Mg                        | -3.588122000 | -1.212380000 | -0.107749000 | C                         | -2.941814000 | -3.727424000 | 0.262370000  |
| O                         | 3.304382000  | -0.084728000 | 0.883846000  | C                         | -1.587176000 | -3.890918000 | 0.075058000  |
| S                         | 4.449621000  | -0.280643000 | -0.258712000 | C                         | -0.762638000 | -2.765566000 | -0.101971000 |
| O                         | 3.917758000  | 0.643603000  | -1.474056000 | C                         | -1.346161000 | -1.456118000 | -0.084320000 |
| O                         | 4.495331000  | -1.661317000 | -0.697009000 | C                         | -3.436029000 | -2.418709000 | 0.261753000  |
| O                         | 5.607569000  | 0.390963000  | 0.275457000  | C                         | 0.641707000  | -2.930651000 | -0.302664000 |
| H                         | 3.343680000  | 0.138494000  | -2.074970000 | C                         | -0.490261000 | -0.286955000 | -0.262816000 |
|                           |              |              |              | C                         | 0.917087000  | -0.520654000 | -0.445294000 |
| 10-HBQS Mn (II)           |              |              |              | C                         | 1.445516000  | -1.855149000 | -0.469233000 |
| $\Delta G = -2633.170148$ |              |              |              | C                         | 1.788043000  | 0.570008000  | -0.626823000 |
| C                         | -2.910098000 | 3.232453000  | -0.410398000 | C                         | 1.334486000  | 1.872688000  | -0.675848000 |
| C                         | -1.590747000 | 3.518271000  | -0.135394000 | C                         | -0.015396000 | 2.119135000  | -0.495438000 |
| C                         | -0.682216000 | 2.475709000  | 0.106769000  | C                         | -0.974062000 | 1.093252000  | -0.270330000 |
| C                         | -1.132133000 | 1.119031000  | 0.070074000  | H                         | 1.049083000  | -3.935698000 | -0.322129000 |
| C                         | -3.301698000 | 1.899040000  | -0.384447000 | H                         | -3.609719000 | -4.567732000 | 0.403175000  |
| C                         | 0.688345000  | 2.776658000  | 0.379818000  | H                         | -1.139284000 | -4.878930000 | 0.060955000  |
| C                         | -0.162788000 | 0.047610000  | 0.225957000  | H                         | -4.501986000 | -2.258710000 | 0.402836000  |
| C                         | 1.207585000  | 0.411783000  | 0.462708000  | H                         | 2.506493000  | -1.988289000 | -0.626898000 |
| C                         | 1.592716000  | 1.788460000  | 0.563684000  | H                         | 2.029924000  | 2.685164000  | -0.847588000 |
| C                         | 2.175398000  | -0.600000000 | 0.594135000  | H                         | -0.381443000 | 3.138680000  | -0.527773000 |
| C                         | 1.857549000  | -1.940334000 | 0.516851000  | N                         | -2.691951000 | -1.329209000 | 0.097211000  |
| C                         | 0.543192000  | -2.303392000 | 0.266745000  | O                         | -2.206802000 | 1.428660000  | -0.091000000 |
| C                         | -0.481390000 | -1.353000000 | 0.112032000  | H                         | -4.780702000 | 3.202055000  | 0.273562000  |
| H                         | 0.984560000  | 3.817830000  | 0.432823000  | H                         | -6.234248000 | 2.843486000  | -0.163329000 |
| H                         | -3.636711000 | 4.004914000  | -0.622653000 | H                         | -2.780244000 | 4.368633000  | 0.805179000  |
| H                         | -1.234796000 | 4.541904000  | -0.111605000 | H                         | -2.671733000 | 3.014574000  | 0.009739000  |
| H                         | -4.334035000 | 1.636999000  | -0.572873000 | O                         | -5.500431000 | 2.538975000  | 0.379962000  |
| H                         | 2.625810000  | 2.025133000  | 0.774071000  | O                         | -3.158028000 | 3.889512000  | 0.059973000  |
| H                         | 2.626334000  | -2.691614000 | 0.643060000  | Na                        | -4.241116000 | 0.560553000  | 0.113502000  |
| H                         | 0.268285000  | -3.347934000 | 0.190080000  | O                         | 3.162202000  | 0.295596000  | -0.879923000 |
| N                         | -2.471006000 | 0.875893000  | -0.129181000 | S                         | 4.280416000  | 0.576293000  | 0.267439000  |
| O                         | -1.682751000 | -1.821942000 | -0.136026000 | O                         | 3.892589000  | -0.475627000 | 1.434671000  |
| H                         | -6.030338000 | -0.919826000 | 0.333218000  | O                         | 4.151493000  | 1.924640000  | 0.784998000  |
| H                         | -5.470953000 | 0.336455000  | 1.042164000  | O                         | 5.515503000  | 0.095231000  | -0.301451000 |

|                           |              |              |              |                           |              |              |              |
|---------------------------|--------------|--------------|--------------|---------------------------|--------------|--------------|--------------|
| H                         | 3.231105000  | -0.099057000 | 2.039739000  | C                         | -0.216419000 | 0.140735000  | -0.384955000 |
|                           |              |              |              | C                         | 1.150570000  | 0.536607000  | -0.485552000 |
| 10-HBQS Ni (II)           |              |              |              | C                         | 1.502239000  | 1.922460000  | -0.440104000 |
| $\Delta G = -2990.453579$ |              |              |              | C                         | 2.130128000  | -0.468252000 | -0.644270000 |
| C                         | -2.944437000 | 3.164874000  | -0.463920000 | C                         | 1.819795000  | -1.807299000 | -0.732013000 |
| C                         | -1.644760000 | 3.482332000  | -0.134095000 | C                         | 0.483549000  | -2.201007000 | -0.646423000 |
| C                         | -0.716576000 | 2.457156000  | 0.105808000  | C                         | -0.502428000 | -1.244556000 | -0.479039000 |
| C                         | -1.133218000 | 1.097245000  | 0.003180000  | H                         | 0.812018000  | 3.921339000  | -0.257524000 |
| C                         | -3.315062000 | 1.824020000  | -0.474262000 | H                         | -3.914135000 | 3.887641000  | 0.323577000  |
| C                         | 0.638719000  | 2.762285000  | 0.450073000  | H                         | -1.510313000 | 4.555830000  | 0.055801000  |
| C                         | -0.148416000 | 0.049190000  | 0.116801000  | H                         | -4.491933000 | 1.502233000  | 0.269200000  |
| C                         | 1.200445000  | 0.406134000  | 0.435666000  | H                         | 2.540719000  | 2.203943000  | -0.542652000 |
| C                         | 1.553126000  | 1.780602000  | 0.635152000  | H                         | 2.600476000  | -2.542928000 | -0.871667000 |
| C                         | 2.163635000  | -0.615064000 | 0.521911000  | H                         | 0.202850000  | -3.243122000 | -0.719400000 |
| C                         | 1.851807000  | -1.941857000 | 0.302756000  | N                         | -2.556535000 | 0.828906000  | -0.049175000 |
| C                         | 0.551412000  | -2.288572000 | -0.044118000 | O                         | -1.786065000 | -1.665560000 | -0.427780000 |
| C                         | -0.456707000 | -1.320844000 | -0.150061000 | H                         | -3.549361000 | -2.094428000 | 2.348091000  |
| H                         | 0.914820000  | 3.804319000  | 0.560794000  | H                         | -3.183195000 | -0.576442000 | 2.501467000  |
| H                         | -3.685517000 | 3.922768000  | -0.678102000 | H                         | -5.753227000 | -2.318770000 | 0.445785000  |
| H                         | -1.323202000 | 4.514946000  | -0.063655000 | H                         | -5.531580000 | -2.383573000 | -1.106993000 |
| H                         | -4.339428000 | 1.544742000  | -0.663393000 | O                         | -3.475711000 | -1.253350000 | 1.874661000  |
| H                         | 2.570771000  | 2.023794000  | 0.905946000  | O                         | -5.119973000 | -2.142678000 | -0.264614000 |
| H                         | 2.616722000  | -2.701767000 | 0.395253000  | V                         | -3.372890000 | -1.073308000 | -0.132497000 |
| H                         | 0.290369000  | -3.321331000 | -0.236816000 | O                         | 3.460261000  | -0.047729000 | -0.809419000 |
| N                         | -2.460455000 | 0.822882000  | -0.217233000 | S                         | 4.543270000  | -0.199887000 | 0.417224000  |
| O                         | -1.652000000 | -1.727606000 | -0.533945000 | O                         | 4.924954000  | -1.761424000 | 0.358296000  |
| H                         | -5.752088000 | -0.601611000 | 0.066519000  | O                         | 3.873958000  | -0.021726000 | 1.682486000  |
| H                         | -5.130553000 | -0.378732000 | 1.473523000  | O                         | 5.662393000  | 0.607350000  | -0.002783000 |
| H                         | -4.628131000 | -3.073361000 | -0.282339000 | H                         | 5.532389000  | -1.948319000 | -0.379473000 |
| H                         | -3.097559000 | -3.327692000 | -0.126834000 |                           |              |              |              |
| O                         | -4.965577000 | -0.275434000 | 0.525744000  | 10-HBQS V (III)           |              |              |              |
| O                         | -3.832423000 | -2.772025000 | 0.177573000  | $\Delta G = -2425.986245$ |              |              |              |
| Ni                        | -3.200115000 | -0.924216000 | -0.063273000 | C                         | -2.944267000 | 3.300964000  | -0.384542000 |
| O                         | 3.468830000  | -0.254010000 | 0.931149000  | C                         | -1.615193000 | 3.569904000  | -0.128825000 |
| S                         | 4.714255000  | -0.275761000 | -0.125213000 | C                         | -0.711531000 | 2.510693000  | 0.053024000  |
| O                         | 4.344574000  | 0.920589000  | -1.145122000 | C                         | -1.170611000 | 1.159529000  | -0.034815000 |
| O                         | 4.737131000  | -1.530396000 | -0.848843000 | C                         | -3.337343000 | 1.970462000  | -0.444351000 |
| O                         | 5.837947000  | 0.187702000  | 0.647460000  | C                         | 0.662518000  | 2.789271000  | 0.333578000  |
| H                         | 3.854474000  | 0.588427000  | -1.916679000 | C                         | -0.218933000 | 0.073410000  | 0.135865000  |
|                           |              |              |              | C                         | 1.151914000  | 0.416711000  | 0.399237000  |
| 10-HBQS V (II)            |              |              |              | C                         | 1.554846000  | 1.787904000  | 0.506676000  |
| $\Delta G = -2426.183701$ |              |              |              | C                         | 2.099039000  | -0.609872000 | 0.566851000  |
| C                         | -3.131815000 | 3.156246000  | 0.174863000  | C                         | 1.762009000  | -1.945885000 | 0.505340000  |
| C                         | -1.810965000 | 3.515377000  | 0.028397000  | C                         | 0.444802000  | -2.290139000 | 0.238812000  |
| C                         | -0.833280000 | 2.520826000  | -0.151568000 | C                         | -0.557230000 | -1.324952000 | 0.050163000  |
| C                         | -1.229188000 | 1.154313000  | -0.196636000 | H                         | 0.971133000  | 3.825658000  | 0.408361000  |
| C                         | -3.457847000 | 1.803047000  | 0.136904000  | H                         | -3.673605000 | 4.086281000  | -0.531571000 |
| C                         | 0.546771000  | 2.871414000  | -0.285757000 | H                         | -1.253672000 | 4.589555000  | -0.063118000 |

|   |              |              |              |    |              |              |              |
|---|--------------|--------------|--------------|----|--------------|--------------|--------------|
| H | -4.378026000 | 1.731235000  | -0.633202000 | O  | -4.984493000 | -0.986113000 | 1.107875000  |
| H | 2.589349000  | 2.010137000  | 0.725822000  | O  | -4.300536000 | -1.960572000 | -1.511937000 |
| H | 2.514990000  | -2.707286000 | 0.661778000  | Zn | -3.246016000 | -0.906209000 | -0.006479000 |
| H | 0.151560000  | -3.330927000 | 0.180387000  | O  | 3.589297000  | -0.149105000 | 0.891785000  |
| N | -2.506068000 | 0.925889000  | -0.278927000 | S  | 4.767288000  | -0.363091000 | -0.214874000 |
| O | -1.771368000 | -1.773617000 | -0.196582000 | O  | 4.277498000  | 0.557773000  | -1.449331000 |
| H | -5.195604000 | -1.247913000 | 1.711079000  | O  | 4.812852000  | -1.747197000 | -0.641250000 |
| H | -4.525217000 | 0.133793000  | 1.966329000  | O  | 5.914226000  | 0.301040000  | 0.350488000  |
| H | -5.071332000 | -3.190187000 | -1.008488000 | H  | 3.711598000  | 0.056140000  | -2.061065000 |
| H | -3.718572000 | -3.634677000 | -0.395605000 |    |              |              |              |
| O | -4.715412000 | -0.525019000 | 1.286240000  |    |              |              |              |
| O | -4.371468000 | -2.922161000 | -0.399515000 |    |              |              |              |
| V | -3.470921000 | -0.933419000 | -0.374016000 |    |              |              |              |
| O | 3.420762000  | -0.236950000 | 0.918877000  |    |              |              |              |
| S | 4.644292000  | -0.372869000 | -0.149954000 |    |              |              |              |
| O | 4.288178000  | 0.750066000  | -1.255952000 |    |              |              |              |
| O | 4.626252000  | -1.679440000 | -0.776040000 |    |              |              |              |
| O | 5.793927000  | 0.120552000  | 0.564845000  |    |              |              |              |
| H | 3.766890000  | 0.372202000  | -1.984710000 |    |              |              |              |

10-HBQS Zn(II)

$\Delta G = -3261.512847$

|   |              |              |              |
|---|--------------|--------------|--------------|
| C | -2.834633000 | 3.307211000  | -0.288732000 |
| C | -1.490648000 | 3.566604000  | -0.132670000 |
| C | -0.580678000 | 2.512535000  | 0.049025000  |
| C | -1.046908000 | 1.159224000  | 0.059360000  |
| C | -3.239418000 | 1.978899000  | -0.250005000 |
| C | 0.804389000  | 2.805675000  | 0.236957000  |
| C | -0.089350000 | 0.069718000  | 0.232475000  |
| C | 1.291916000  | 0.437601000  | 0.422987000  |
| C | 1.699293000  | 1.812082000  | 0.427657000  |
| C | 2.260090000  | -0.562555000 | 0.620106000  |
| C | 1.940325000  | -1.903918000 | 0.656453000  |
| C | 0.624157000  | -2.276945000 | 0.448510000  |
| C | -0.409731000 | -1.345445000 | 0.223204000  |
| H | 1.116569000  | 3.843473000  | 0.233321000  |
| H | -3.563463000 | 4.093711000  | -0.429582000 |
| H | -1.115766000 | 4.583783000  | -0.142622000 |
| H | -4.289301000 | 1.730644000  | -0.352632000 |
| H | 2.743038000  | 2.041892000  | 0.585566000  |
| H | 2.707801000  | -2.645458000 | 0.836912000  |
| H | 0.344267000  | -3.323051000 | 0.457693000  |
| N | -2.397023000 | 0.949410000  | -0.086298000 |
| O | -1.596595000 | -1.858144000 | 0.007828000  |
| H | -5.541952000 | -1.758395000 | 0.942749000  |
| H | -4.924049000 | -0.878083000 | 2.066305000  |
| H | -4.820457000 | -1.450901000 | -2.147347000 |
| H | -3.756063000 | -2.569471000 | -2.028483000 |
